# Supplementary material for: Halogenated and Nonhalogenated Metabolites from the Marine-Alga-Endophytic Fungus Trichoderma asperellum cf44-2
Source: PubMed Central journal article supplement (PMC6117674; doi:10.3390/md16080266), 2018-08-02
Supplement: marinedrugs-16-00266-s001.pdf [file marinedrugs-16-00266-s001.pdf]

# Supporting Information

## Halogenated and Nonhalogenated Metabolites from the Marine-Alga-Endophytic Fungus *Trichoderma asperellum* cf44-2

Yin-Ping Song<sup>1,2</sup>, Feng-Ping Miao<sup>1</sup>, Sheng-Tao Fang<sup>1</sup>, Xiu-Li Yin<sup>1</sup> and Nai-Yun Ji<sup>1,\*</sup>

<sup>1</sup> Yantai Institute of Coastal Zone Research, Chinese Academy of Sciences, Yantai 264003, China; ypsong@yic.ac.cn (Y.-P.S.); fpmiao@yic.ac.cn (F.-P.M.); stfang@yic.ac.cn (S.-T.F.); xlyin@yic.ac.cn (X.-L.Y.)

<sup>2</sup> University of Chinese Academy of Sciences, Beijing 100049, China

\* Correspondence: nyji@yic.ac.cn; Tel.: +86-535-210-9176

## List of Supporting Information

- Figure S1.**  $^1\text{H}$  NMR spectrum of compound **1** in  $\text{CDCl}_3$ .
- Figure S2.**  $^{13}\text{C}$  NMR and DEPT spectra of compound **1** in  $\text{CDCl}_3$ .
- Figure S3.** HSQC spectrum of compound **1** in  $\text{CDCl}_3$ .
- Figure S4.** HMBC spectrum of compound **1** in  $\text{CDCl}_3$ .
- Figure S5.** COSY spectrum of compound **1** in  $\text{CDCl}_3$ .
- Figure S6.** NOESY spectrum of compound **1** in  $\text{CDCl}_3$ .
- Figure S7.** EIMS spectrum of compound **1**.
- Figure S8.** HREIMS spectrum of compound **1**.
- Figure S9.**  $^1\text{H}$  NMR spectrum of compound **2** in  $\text{CD}_3\text{OD}$ .
- Figure S10.**  $^{13}\text{C}$  NMR and DEPT spectra of compound **2** in  $\text{CD}_3\text{OD}$ .
- Figure S11.** HSQC spectrum of compound **2** in  $\text{CD}_3\text{OD}$ .
- Figure S12.** HMBC spectrum of compound **2** in  $\text{CD}_3\text{OD}$ .
- Figure S13.** COSY spectrum of compound **2** in  $\text{CD}_3\text{OD}$ .
- Figure S14.** NOESY spectrum of compound **2** in  $\text{CD}_3\text{OD}$ .
- Figure S15.** EIMS spectrum of compound **2**.
- Figure S16.** HREIMS spectrum of compound **2**.
- Figure S17.**  $^1\text{H}$  NMR spectrum of compound **3** in  $\text{CDCl}_3$ .
- Figure S18.**  $^{13}\text{C}$  NMR and DEPT spectra of compound **3** in  $\text{CDCl}_3$ .
- Figure S19.** HSQC spectrum of compound **3** in  $\text{CDCl}_3$ .
- Figure S20.** HMBC spectrum of compound **3** in  $\text{CDCl}_3$ .
- Figure S21.** COSY spectrum of compound **3** in  $\text{CDCl}_3$ .
- Figure S22.** NOESY spectrum of compound **3** in  $\text{CDCl}_3$ .
- Figure S23.** EIMS spectrum of compound **3**.
- Figure S24.** HREIMS spectrum of compound **3**.
- Figure S25.**  $^1\text{H}$  NMR spectrum of compound **4** in  $\text{CDCl}_3$ .
- Figure S26.**  $^{13}\text{C}$  NMR and DEPT spectra of compound **4** in  $\text{CDCl}_3$ .
- Figure S27.** HSQC spectrum of compound **4** in  $\text{CDCl}_3$ .
- Figure S28.** HMBC spectrum of compound **4** in  $\text{CDCl}_3$ .
- Figure S29.** COSY spectrum of compound **4** in  $\text{CDCl}_3$ .
- Figure S30.** NOESY spectrum of compound **4** in  $\text{CDCl}_3$ .
- Figure S31.** EIMS spectrum of compound **4**.
- Figure S32.** HREIMS spectrum of compound **4**.
- Figure S33.**  $^1\text{H}$  NMR spectrum of compound **5** in  $\text{CDCl}_3$ .
- Figure S34.**  $^{13}\text{C}$  NMR and DEPT spectra of compound **5** in  $\text{CDCl}_3$ .

**Figure S35.** HSQC spectrum of compound **5** in CDCl<sub>3</sub>.

**Figure S36.** HMBC spectrum of compound **5** in CDCl<sub>3</sub>.

**Figure S37.** COSY spectrum of compound **5** in CDCl<sub>3</sub>.

**Figure S38.** <sup>1</sup>H NMR spectrum of compound **6** in CD<sub>3</sub>OD.

**Figure S39.** <sup>13</sup>C NMR and DEPT spectra of compound **6** in CD<sub>3</sub>OD.

**Figure S40.** HSQC spectrum of compound **6** in CD<sub>3</sub>OD.

**Figure S41.** HMBC spectrum of compound **6** in CD<sub>3</sub>OD.

**Figure S42.** COSY spectrum of compound **6** in CD<sub>3</sub>OD.

**Figure S43.** EIMS spectrum of compound **6**.

**Figure S44.** HREIMS spectrum of compound **6**.

**Figure S45.** <sup>1</sup>H NMR spectrum of compound **7** in CD<sub>3</sub>OD.

**Figure S46.** <sup>13</sup>C NMR and DEPT spectra of compound **7** in CD<sub>3</sub>OD.

**Figure S47.** HSQC spectrum of compound **7** in CD<sub>3</sub>OD.

**Figure S48.** HMBC spectrum of compound **7** in CD<sub>3</sub>OD.

**Figure S49.** COSY spectrum of compound **7** in CD<sub>3</sub>OD.

**Figure S50.** NOESY spectrum of compound **7** in CD<sub>3</sub>OD.

**Figure S51.** EIMS spectrum of compound **7**.

**Figure S52.** HREIMS spectrum of compound **7**.

**Figure S53.** <sup>1</sup>H NMR spectrum of compound **8** in CD<sub>3</sub>OD.

**Figure S54.** <sup>13</sup>C NMR and DEPT spectra of compound **8** in CD<sub>3</sub>OD.

**Figure S55.** HSQC spectrum of compound **8** in CD<sub>3</sub>OD.

**Figure S56.** HMBC spectrum of compound **8** in CD<sub>3</sub>OD.

**Figure S57.** COSY spectrum of compound **8** in CD<sub>3</sub>OD.

**Figure S58.** EIMS spectrum of compound **8**.

**Figure S59.** HREIMS spectrum of compound **8**.

**Figure S60.** Energy-minimized conformers with populations of  
(3*S*,7*S*)-1-hydroxy-3-*p*-menthen-9-oic acid.

**Figure S61.** Energy-minimized conformers with populations of  
(3*S*,7*R*)-1-hydroxy-3-*p*-menthen-9-oic acid.

**Figure S62.** Energy-minimized conformers with populations of compound **5**.

**Figure S63.** Energy-minimized conformers with populations of  
(3*S*,6*R*)-3-hydroxytrichodenone C.

**Figure S64.** Energy-minimized conformers with populations of  
(3*S*,6*S*)-3-hydroxytrichodenone C.

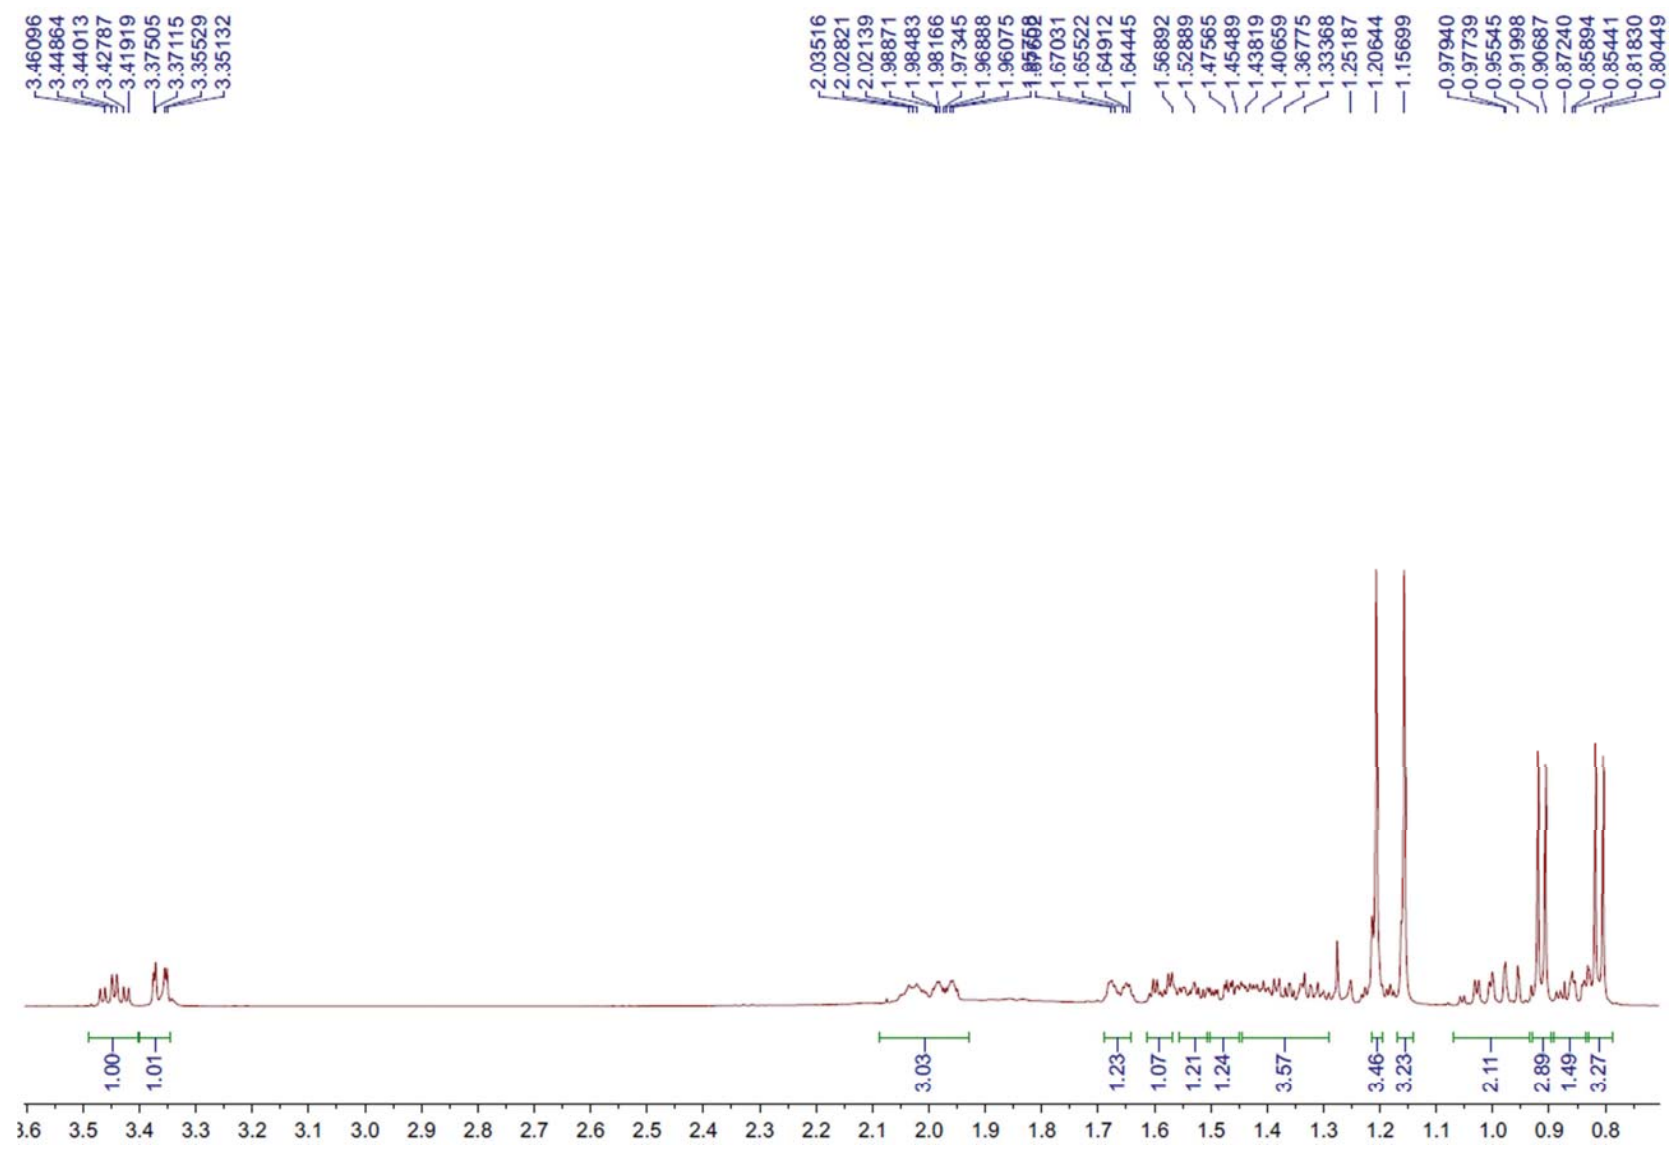

**Figure S1.**  $^1\text{H}$  NMR spectrum of compound **1** in  $\text{CDCl}_3$ .

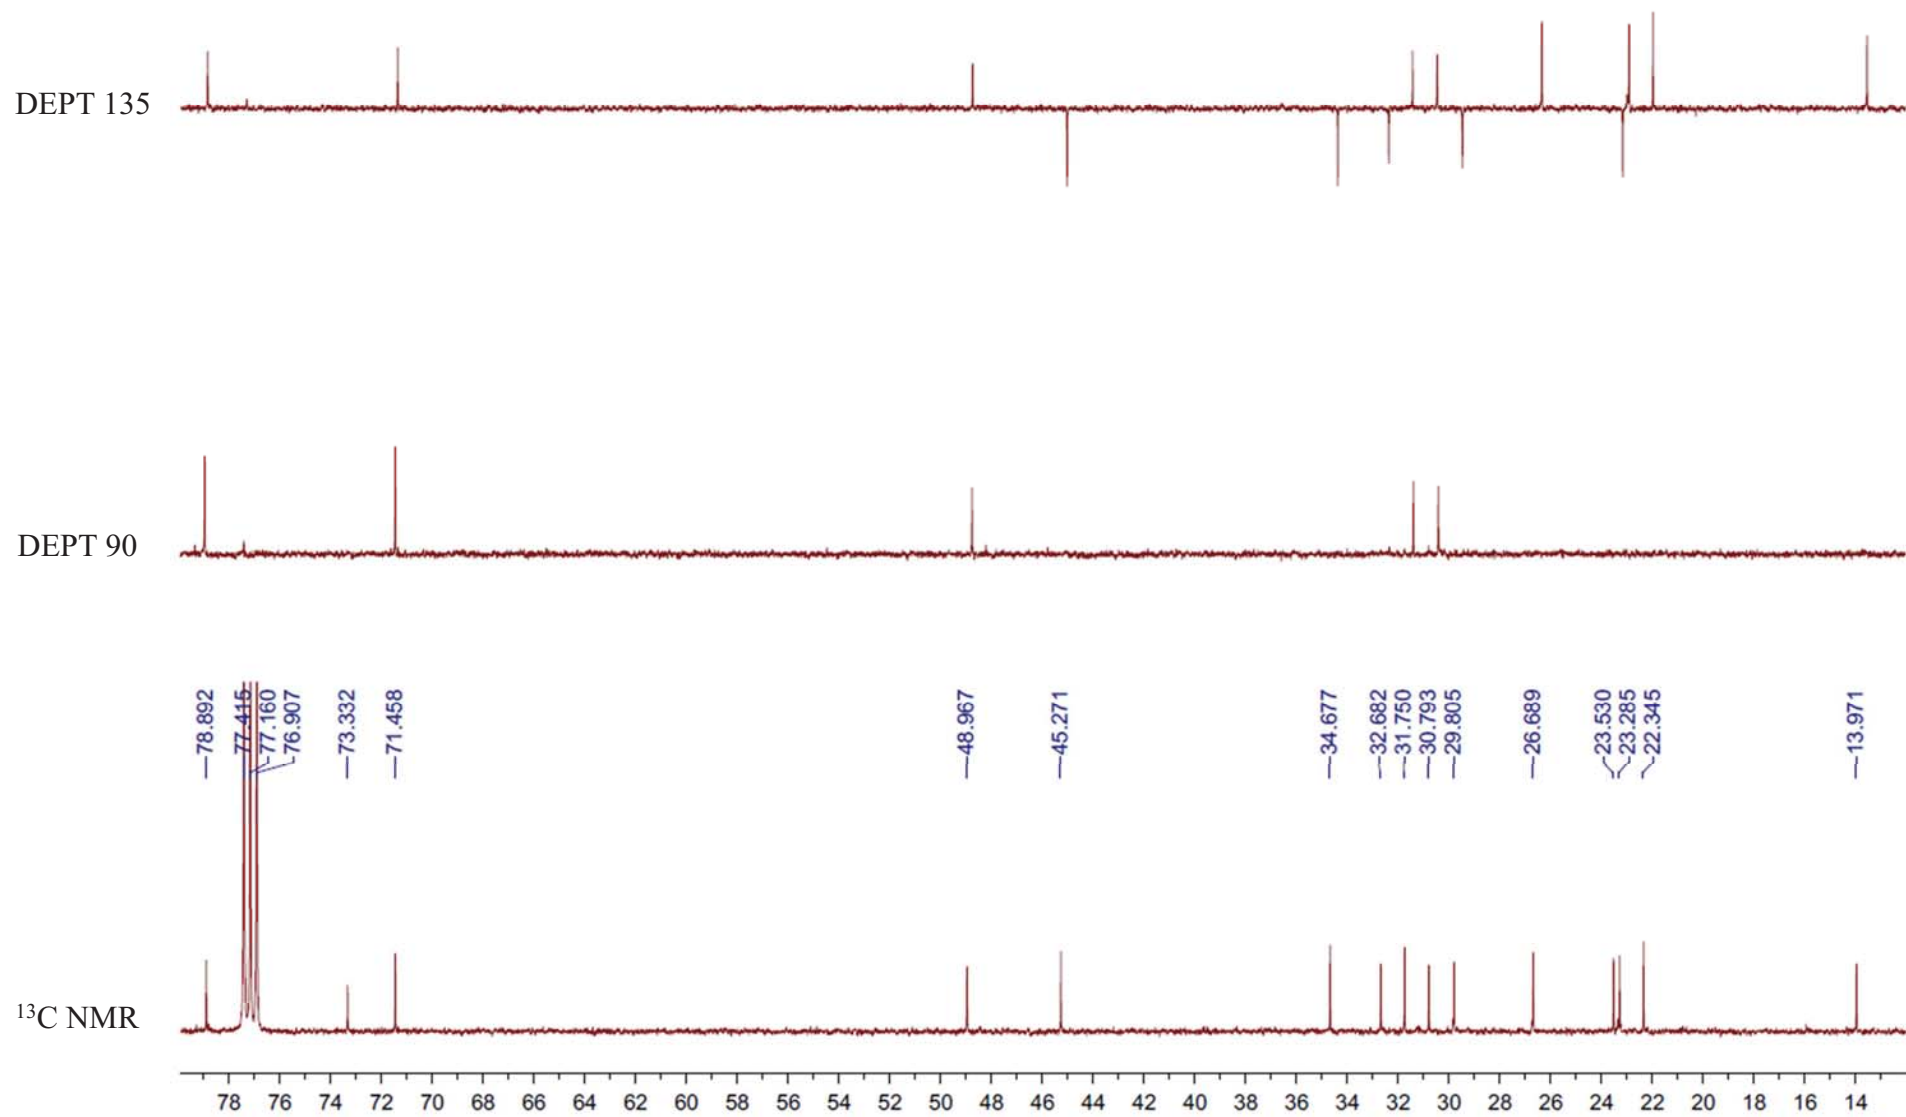

**Figure S2.**  $^{13}\text{C}$  NMR and DEPT spectra of compound **1** in  $\text{CDCl}_3$ .

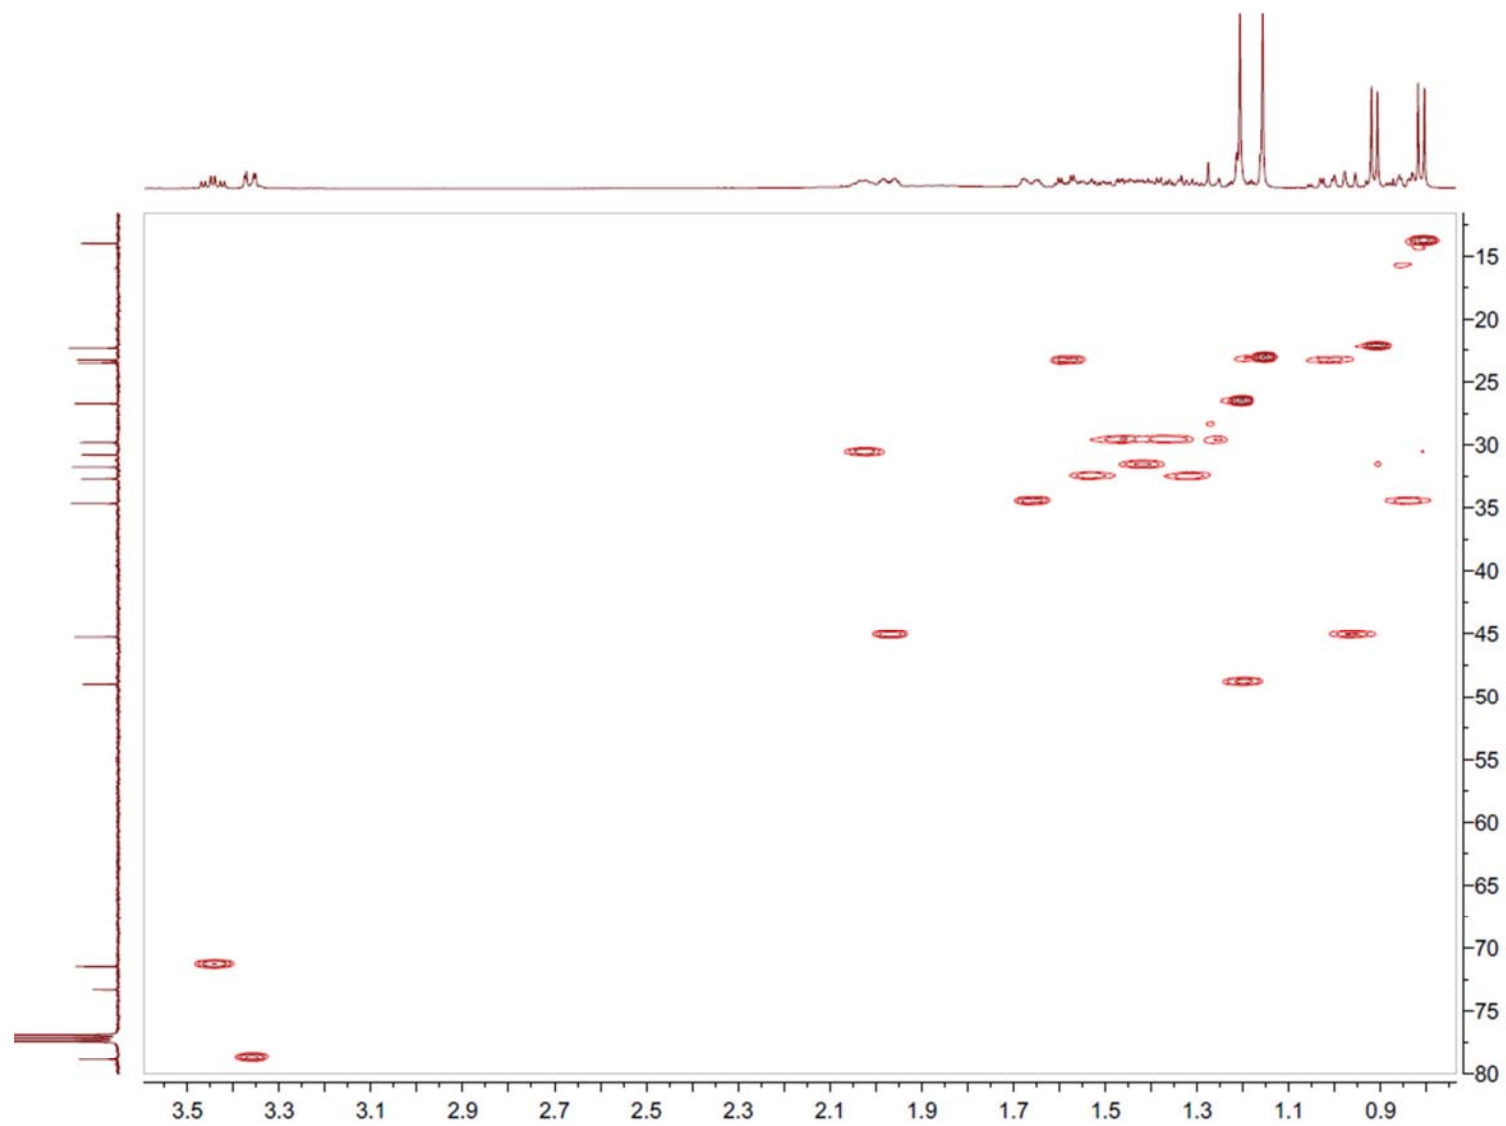

**Figure S3.** HSQC spectrum of compound **1** in  $\text{CDCl}_3$ .

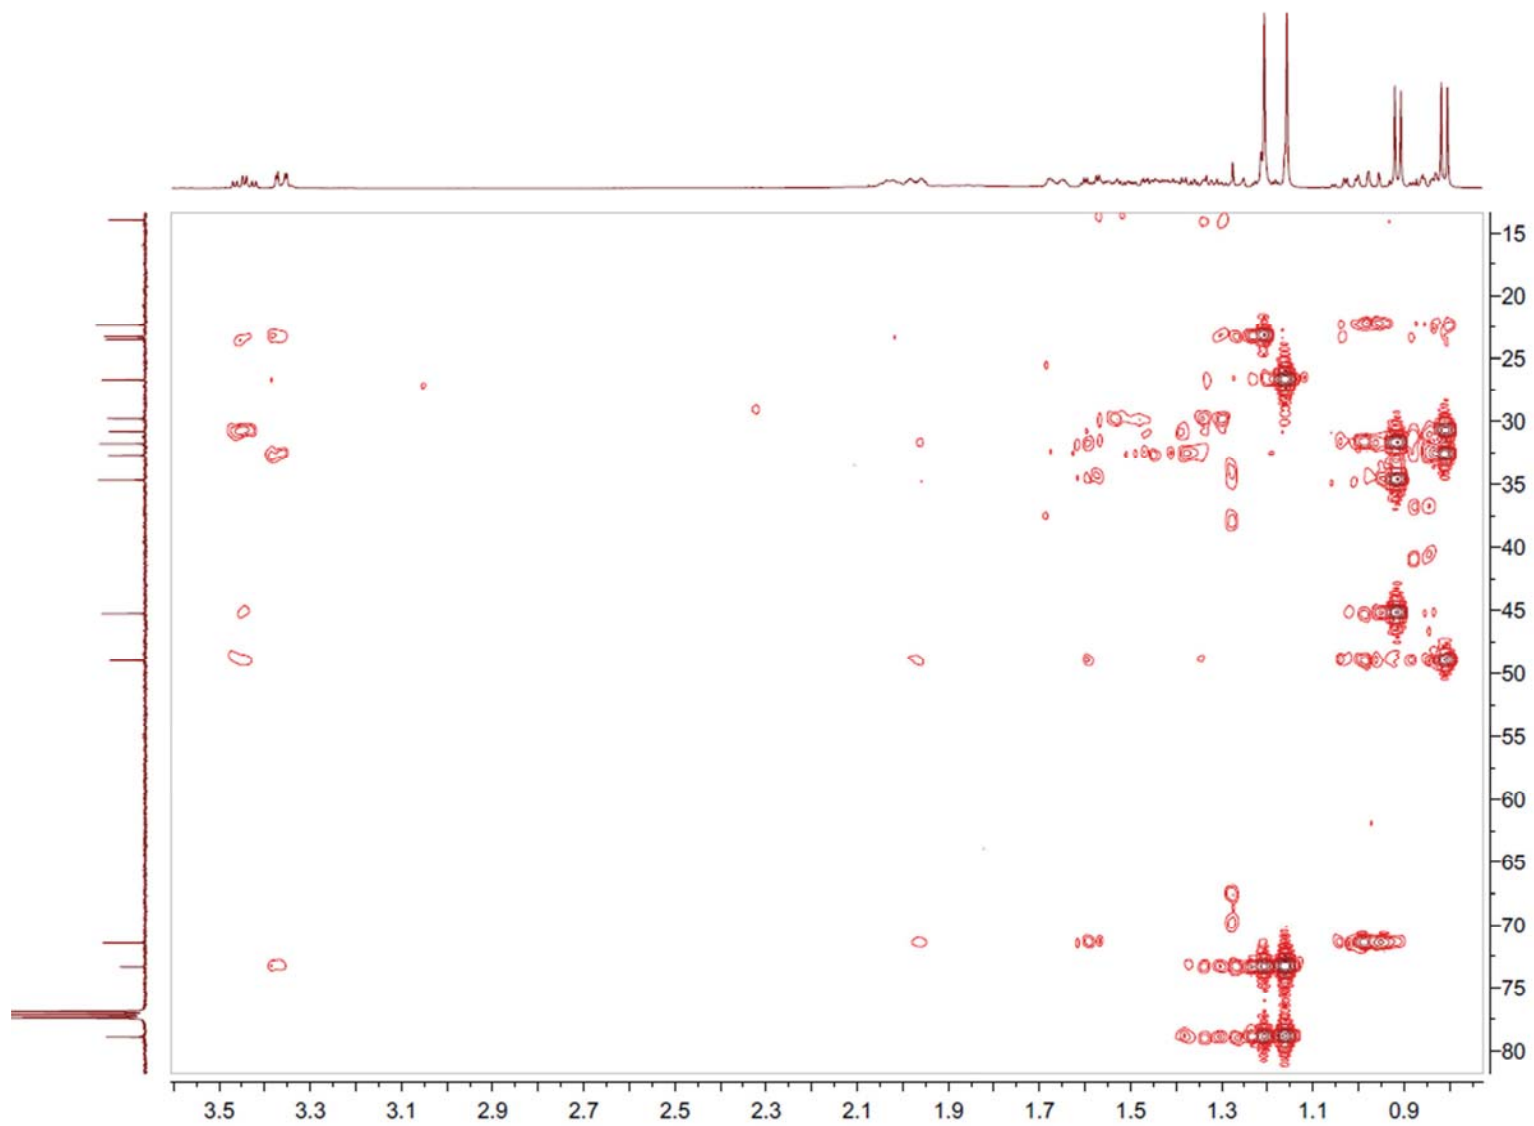

**Figure S4.** HMBC spectrum of compound 1 in CDCl<sub>3</sub>.

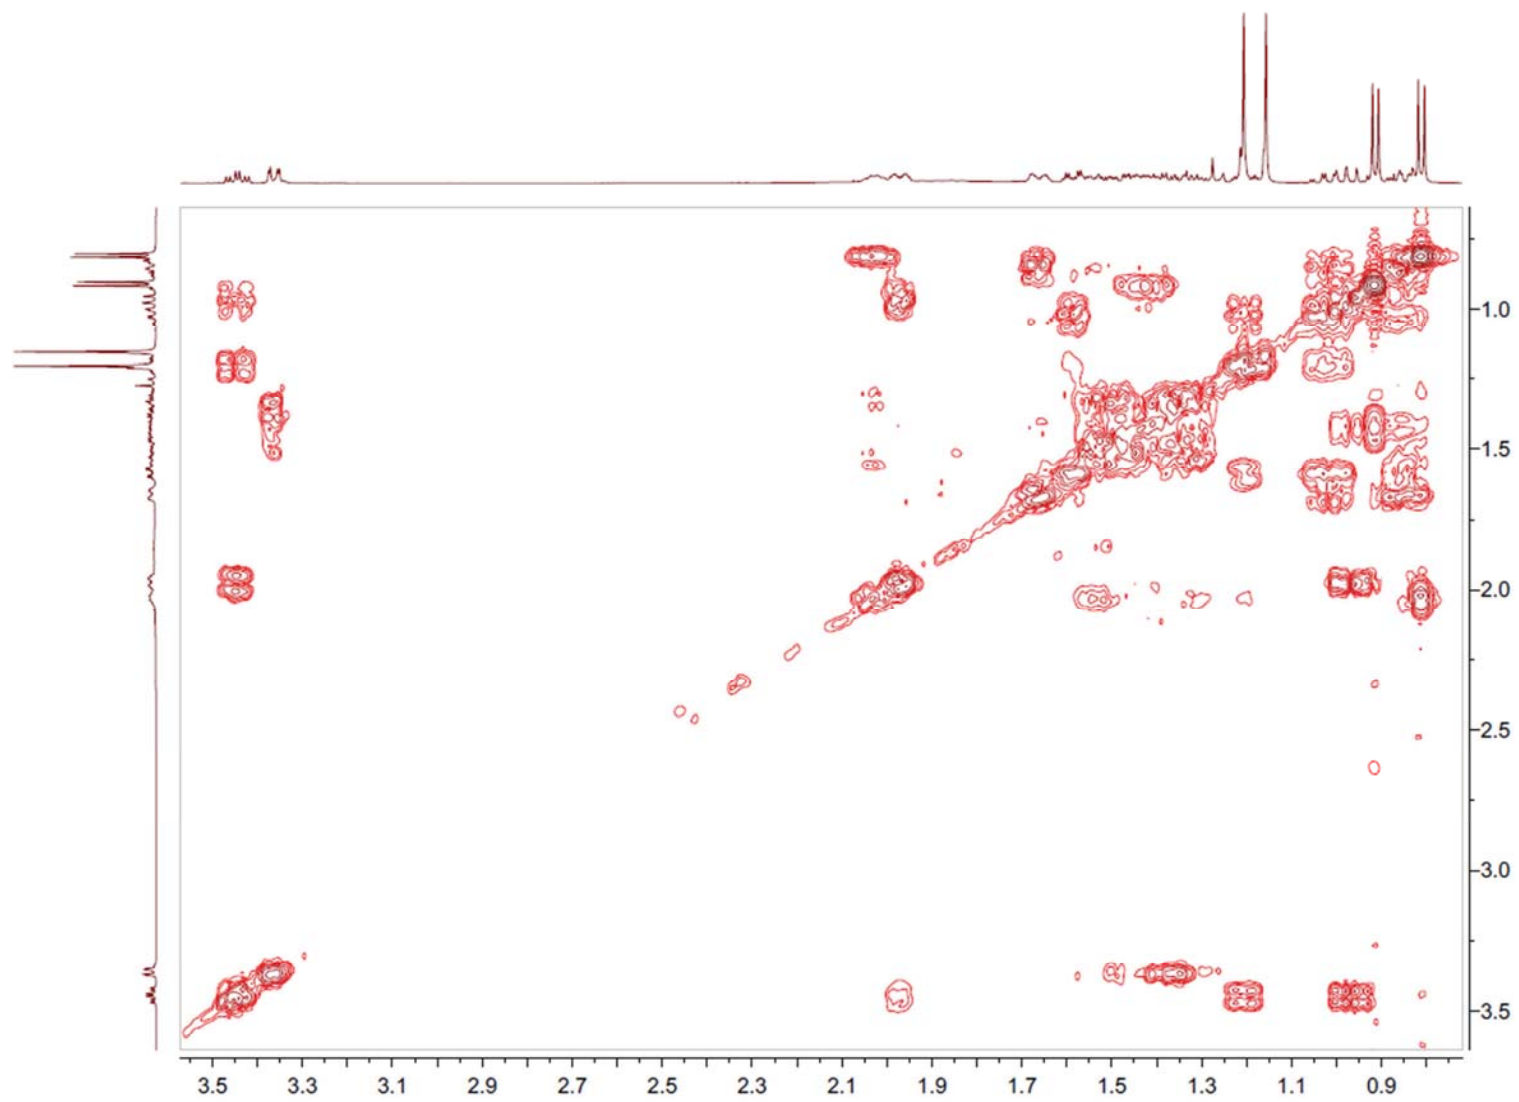

Figure S5. COSY spectrum of compound 1 in  $\text{CDCl}_3$ .



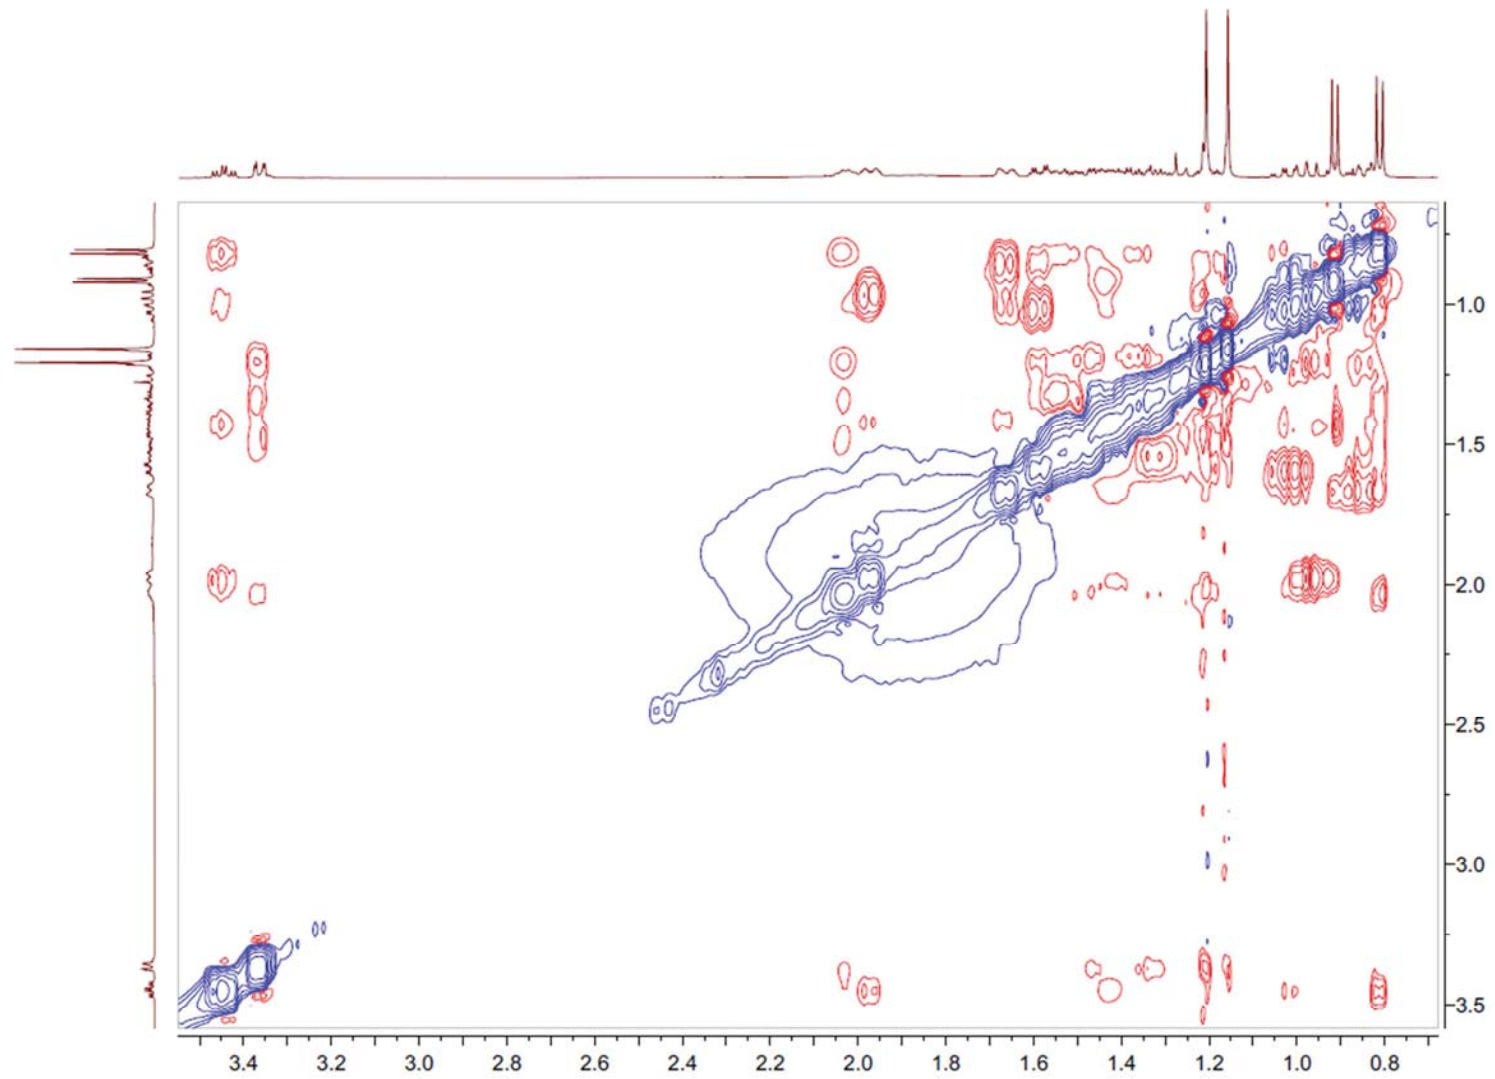

**Figure S6.** NOESY spectrum of compound **1** in  $\text{CDCl}_3$ .

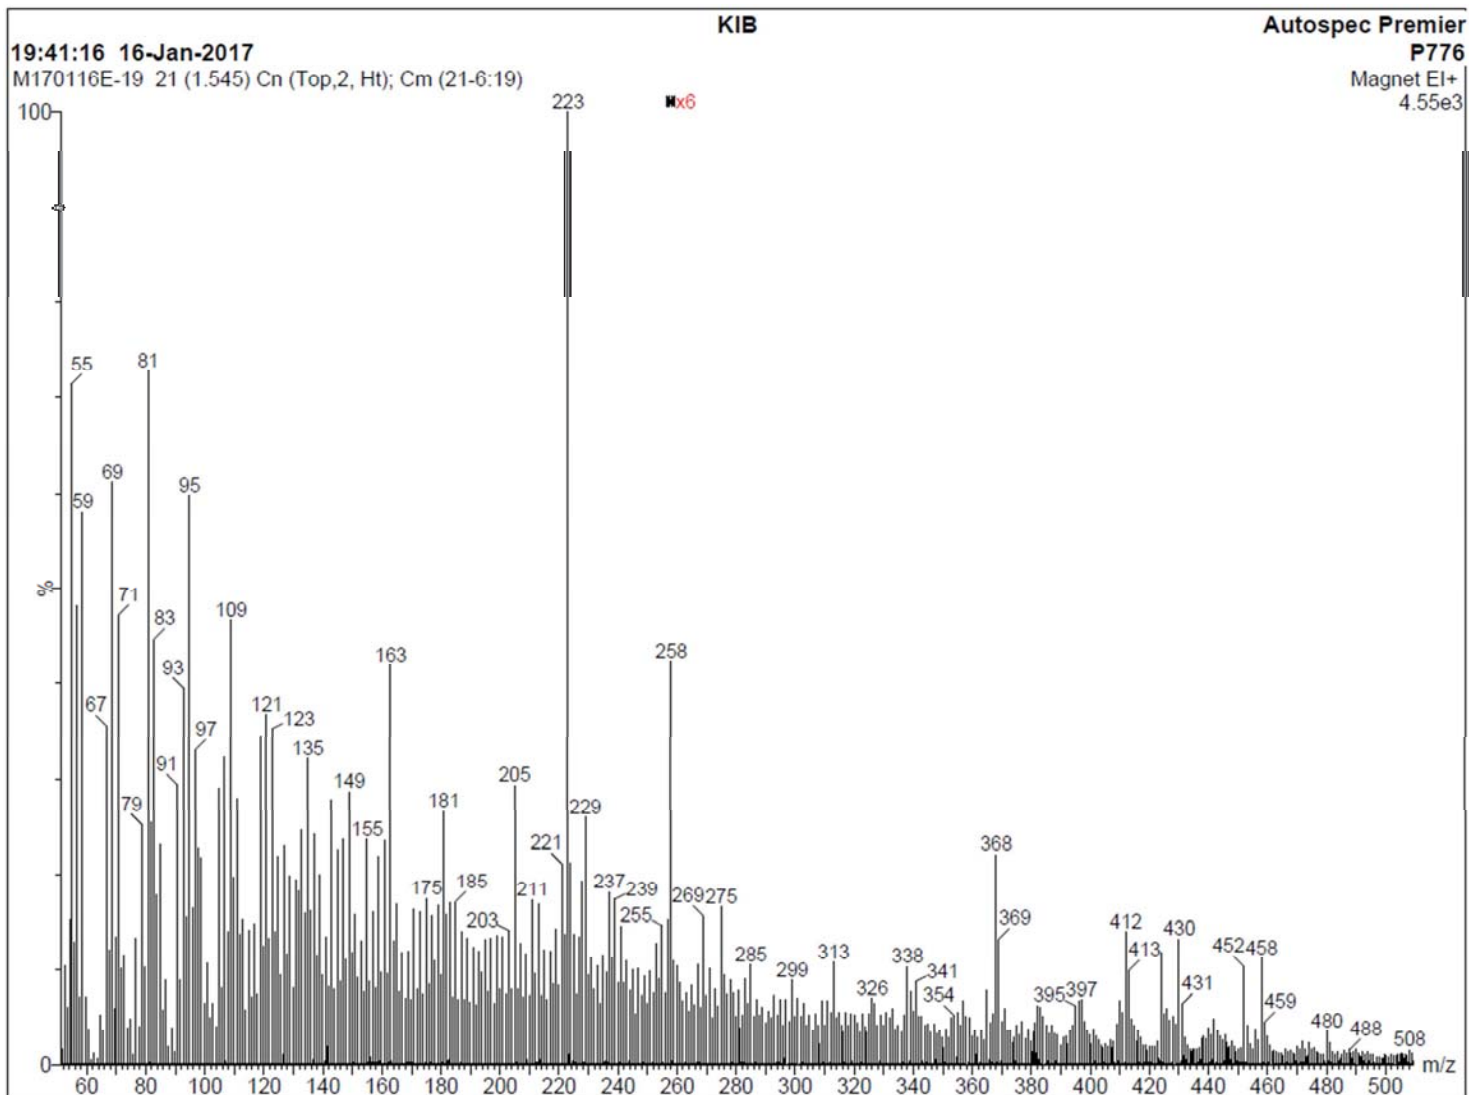

Figure S7. EIMS spectrum of compound 1.

### Single Mass Analysis

Tolerance = 10.0 PPM / DBE: min = -10.0, max = 120.0

Selected filters: None

Monoisotopic Mass, Odd and Even Electron Ions

28 formula(e) evaluated with 1 results within limits (up to 51 closest results for each mass)

Elements Used:

C: 0-200 H: 0-400 O: 0-5

19:36:21 16-Jan-2017

Voltage EI+

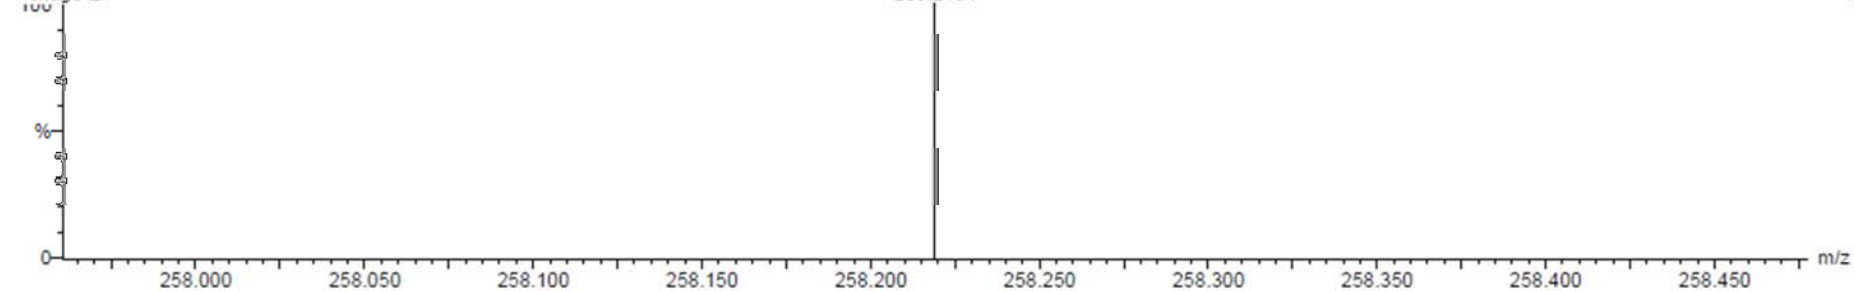

|          |            |      |      |       |           |            |
|----------|------------|------|------|-------|-----------|------------|
| Minimum: |            |      |      | -10.0 |           |            |
| Maximum: | 200.0      | 10.0 |      | 120.0 |           |            |
| Mass     | Calc. Mass | mDa  | PPM  | DBE   | i-FIT     | Formula    |
| 258.2191 | 258.2195   | -0.4 | -1.5 | 1.0   | 5546026.0 | C15 H30 O3 |

Figure S8. HREIMS spectrum of compound 1.

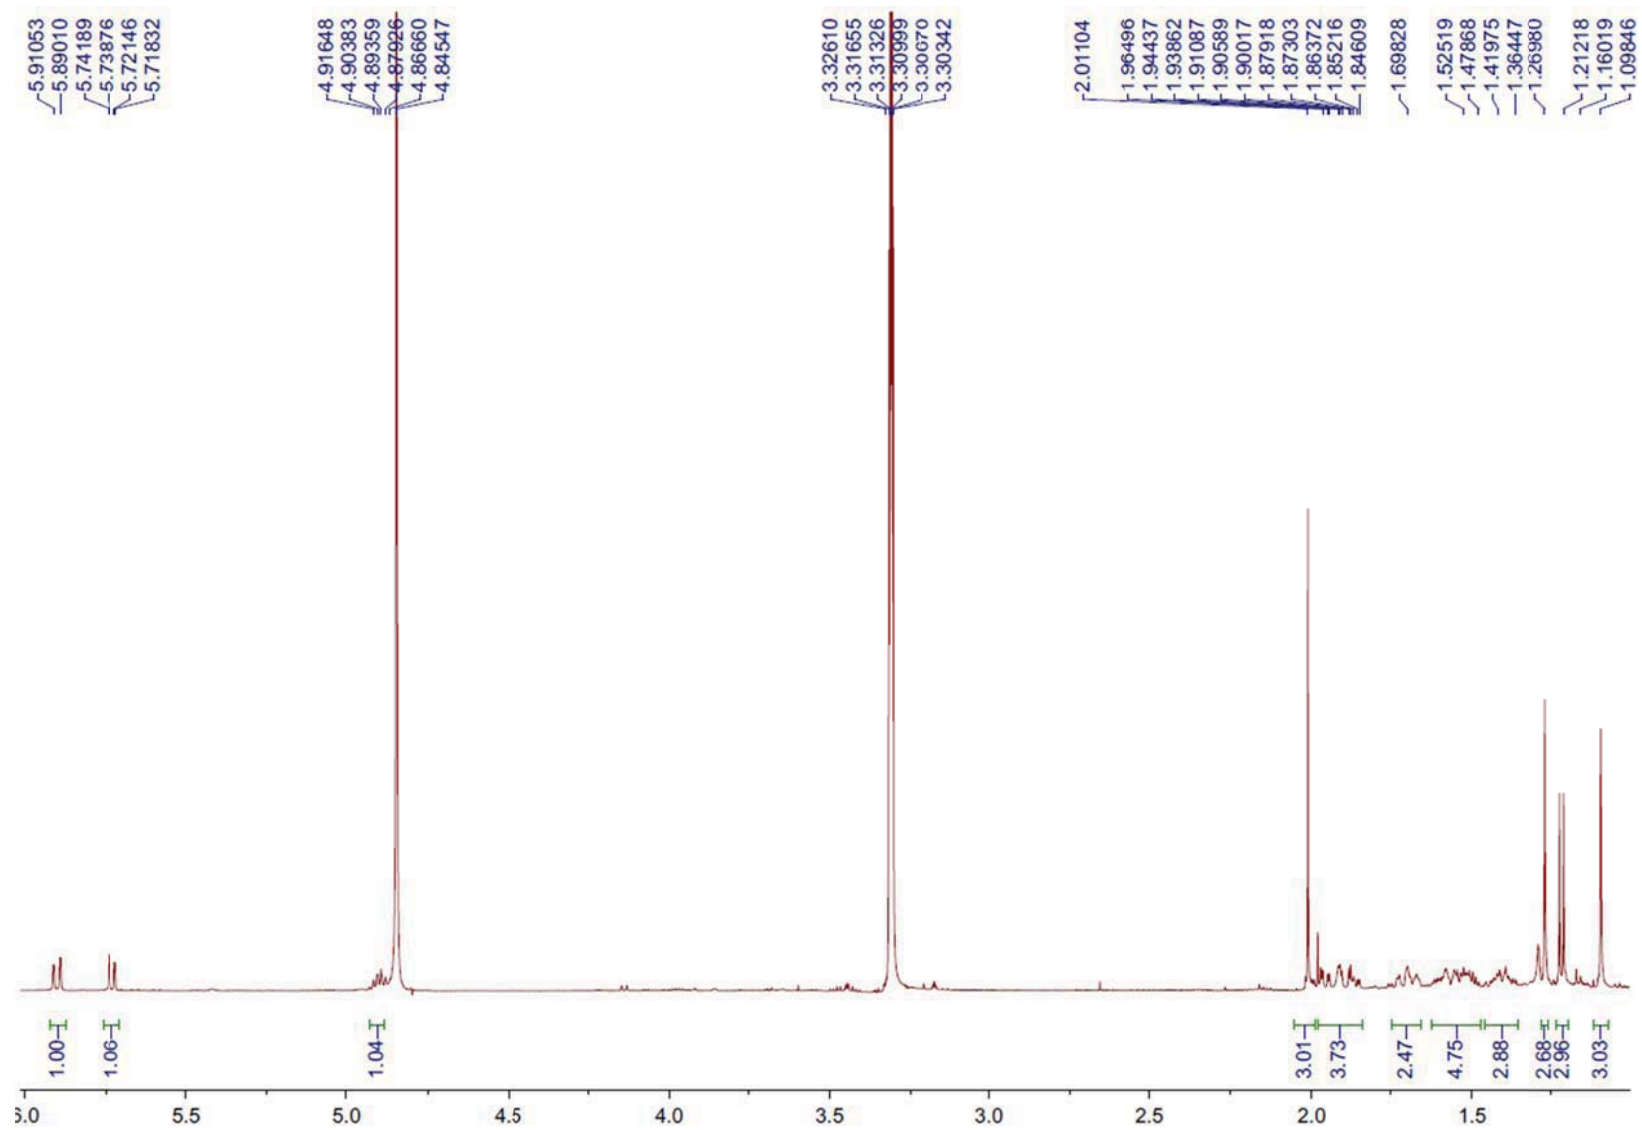

Figure S8.  $^1\text{H}$  NMR spectrum of compound **2** in  $\text{CD}_3\text{OD}$ .

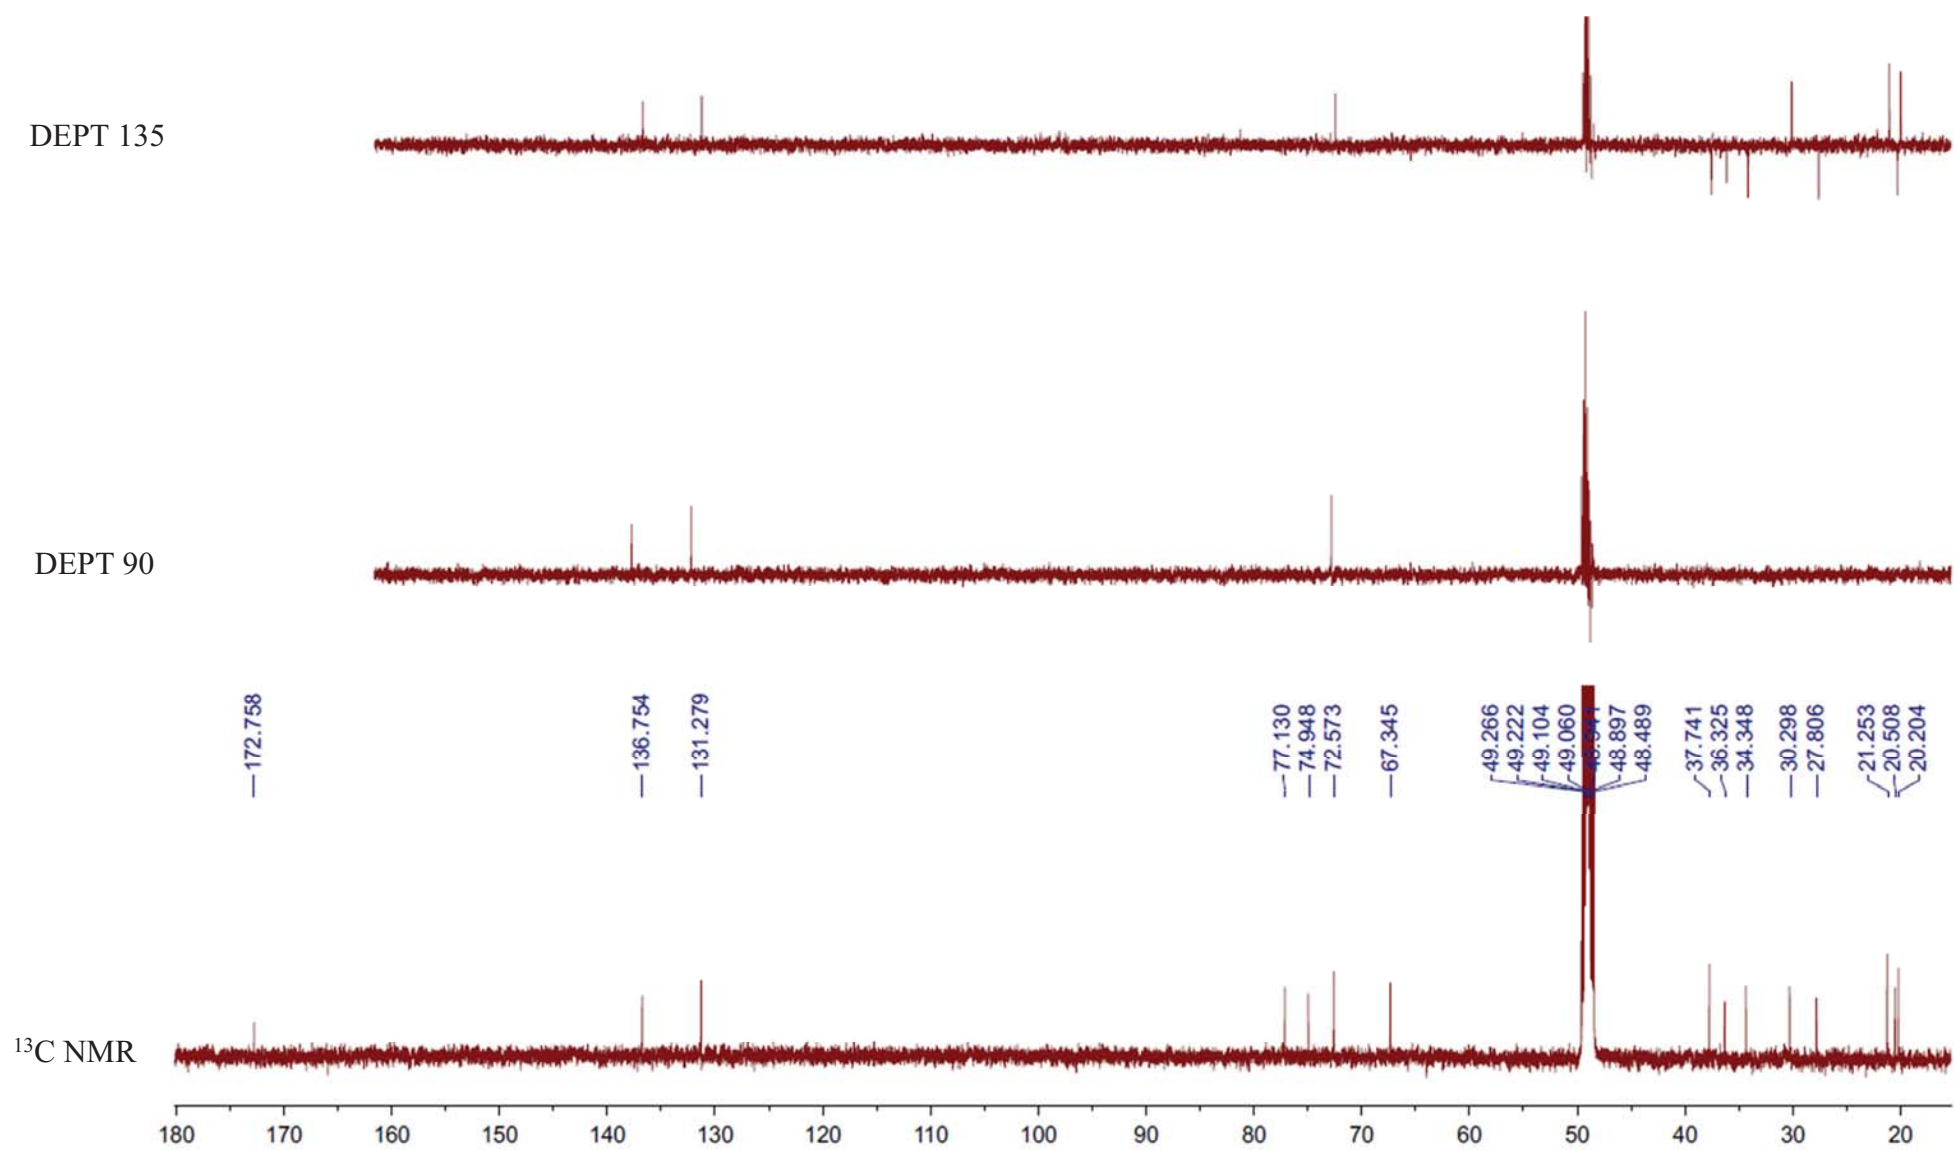

Figure S10.  $^{13}\text{C}$  NMR and DEPT spectra of compound **2** in  $\text{CD}_3\text{OD}$ .

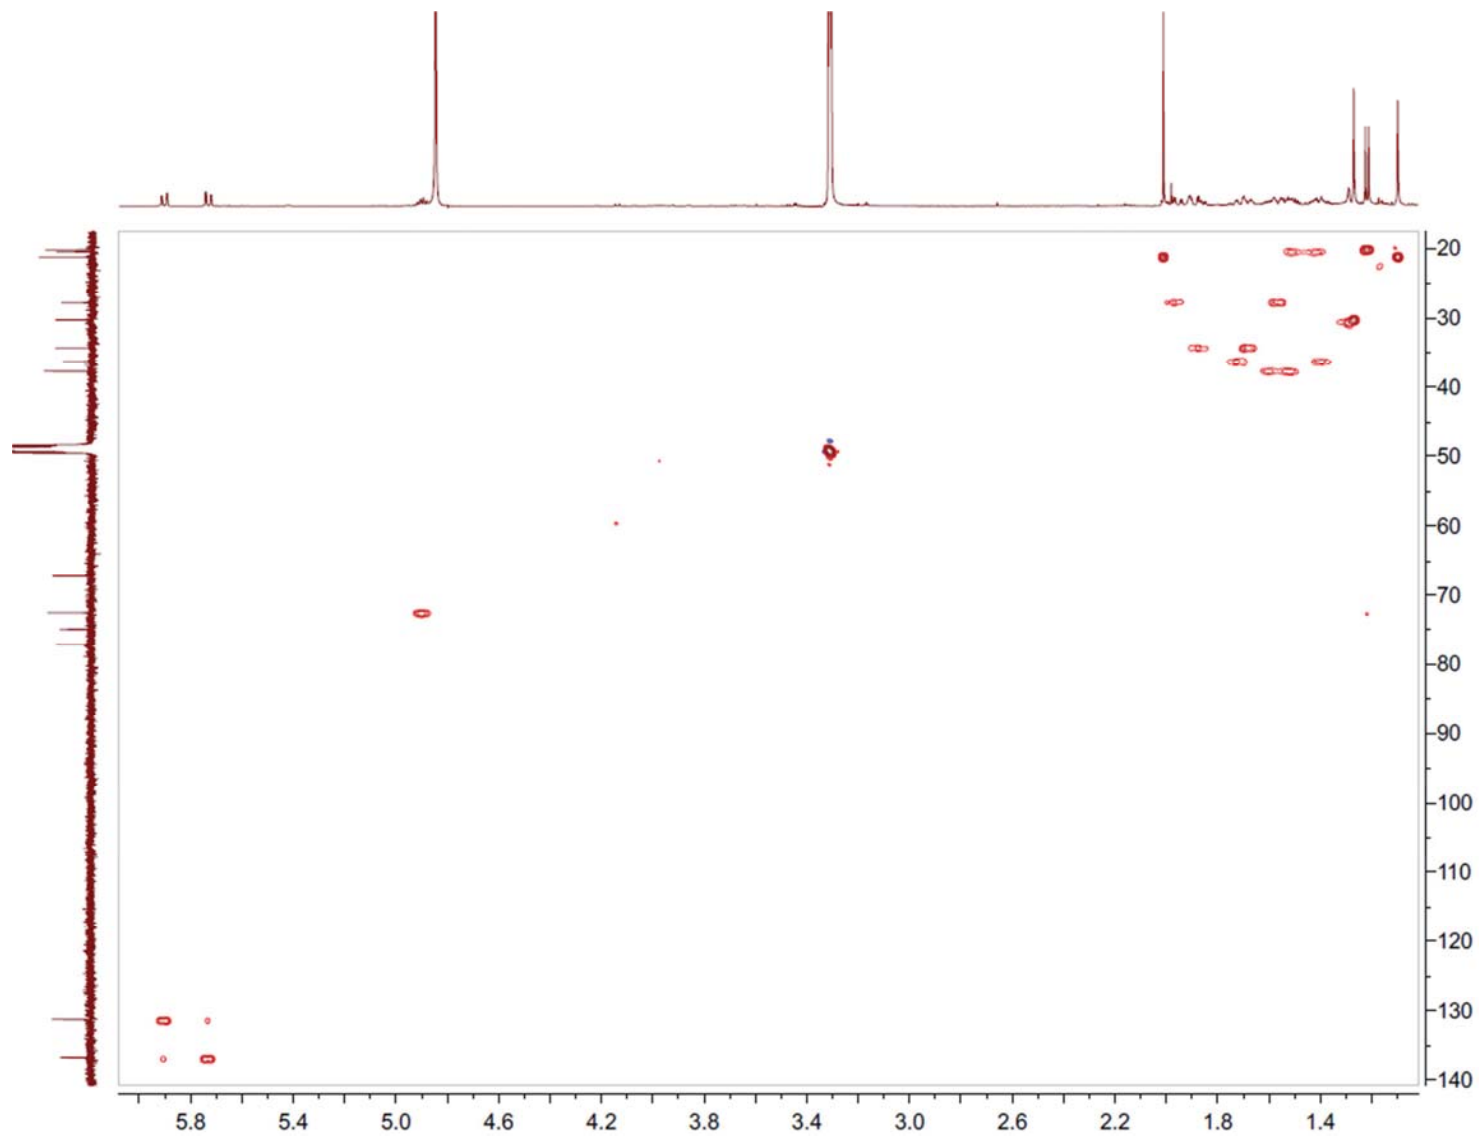

**Figure S11.** HSQC spectrum of compound **2** in CD<sub>3</sub>OD.

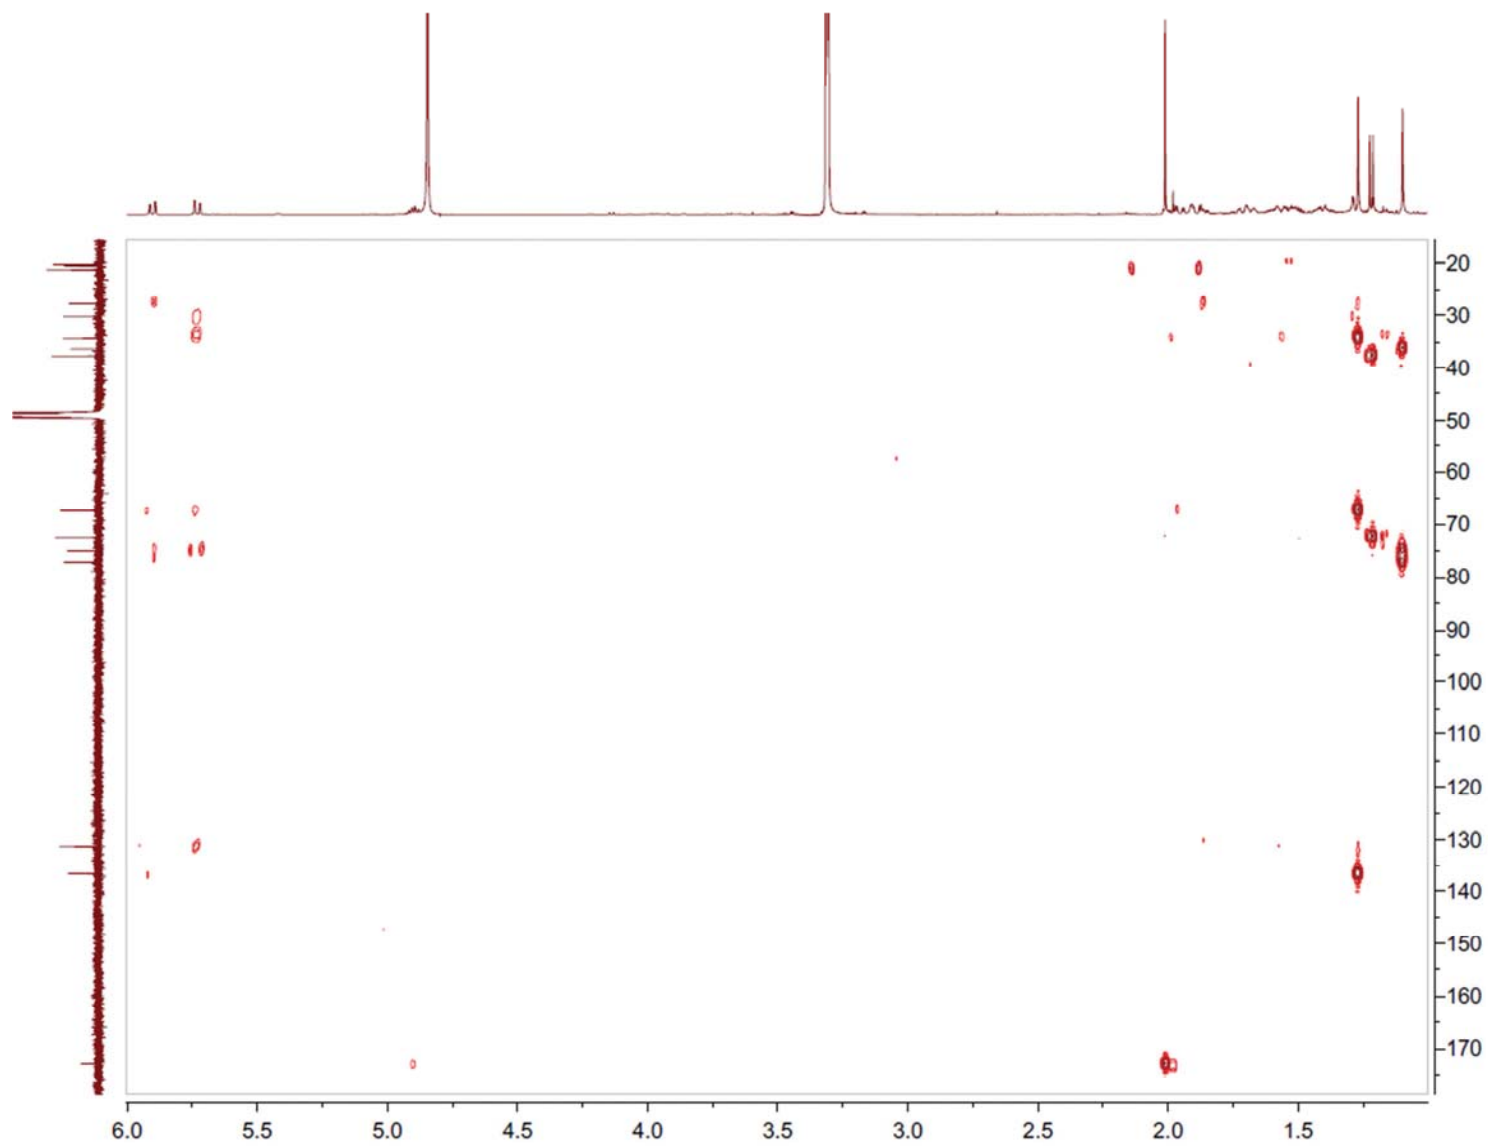

**Figure S12.** HMBC spectrum of compound **2** in CD<sub>3</sub>OD.

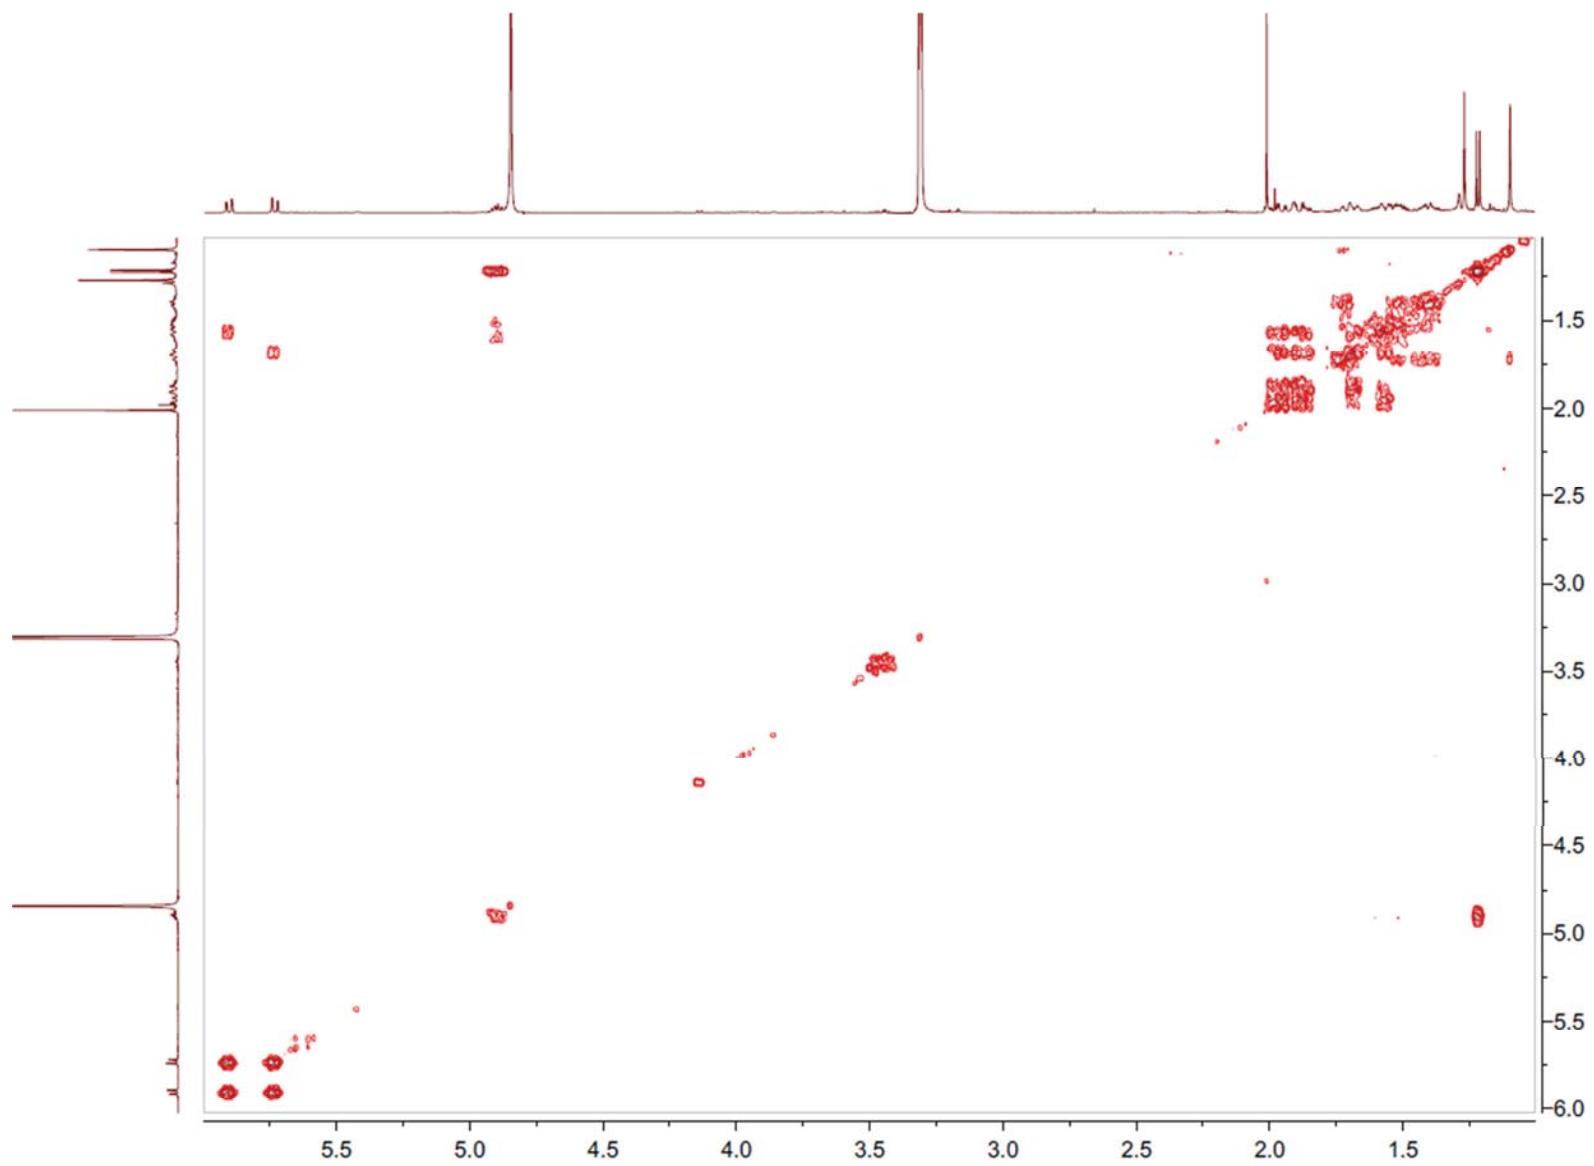

**Figure S13.** COSY spectrum of compound **2** in CD<sub>3</sub>OD.



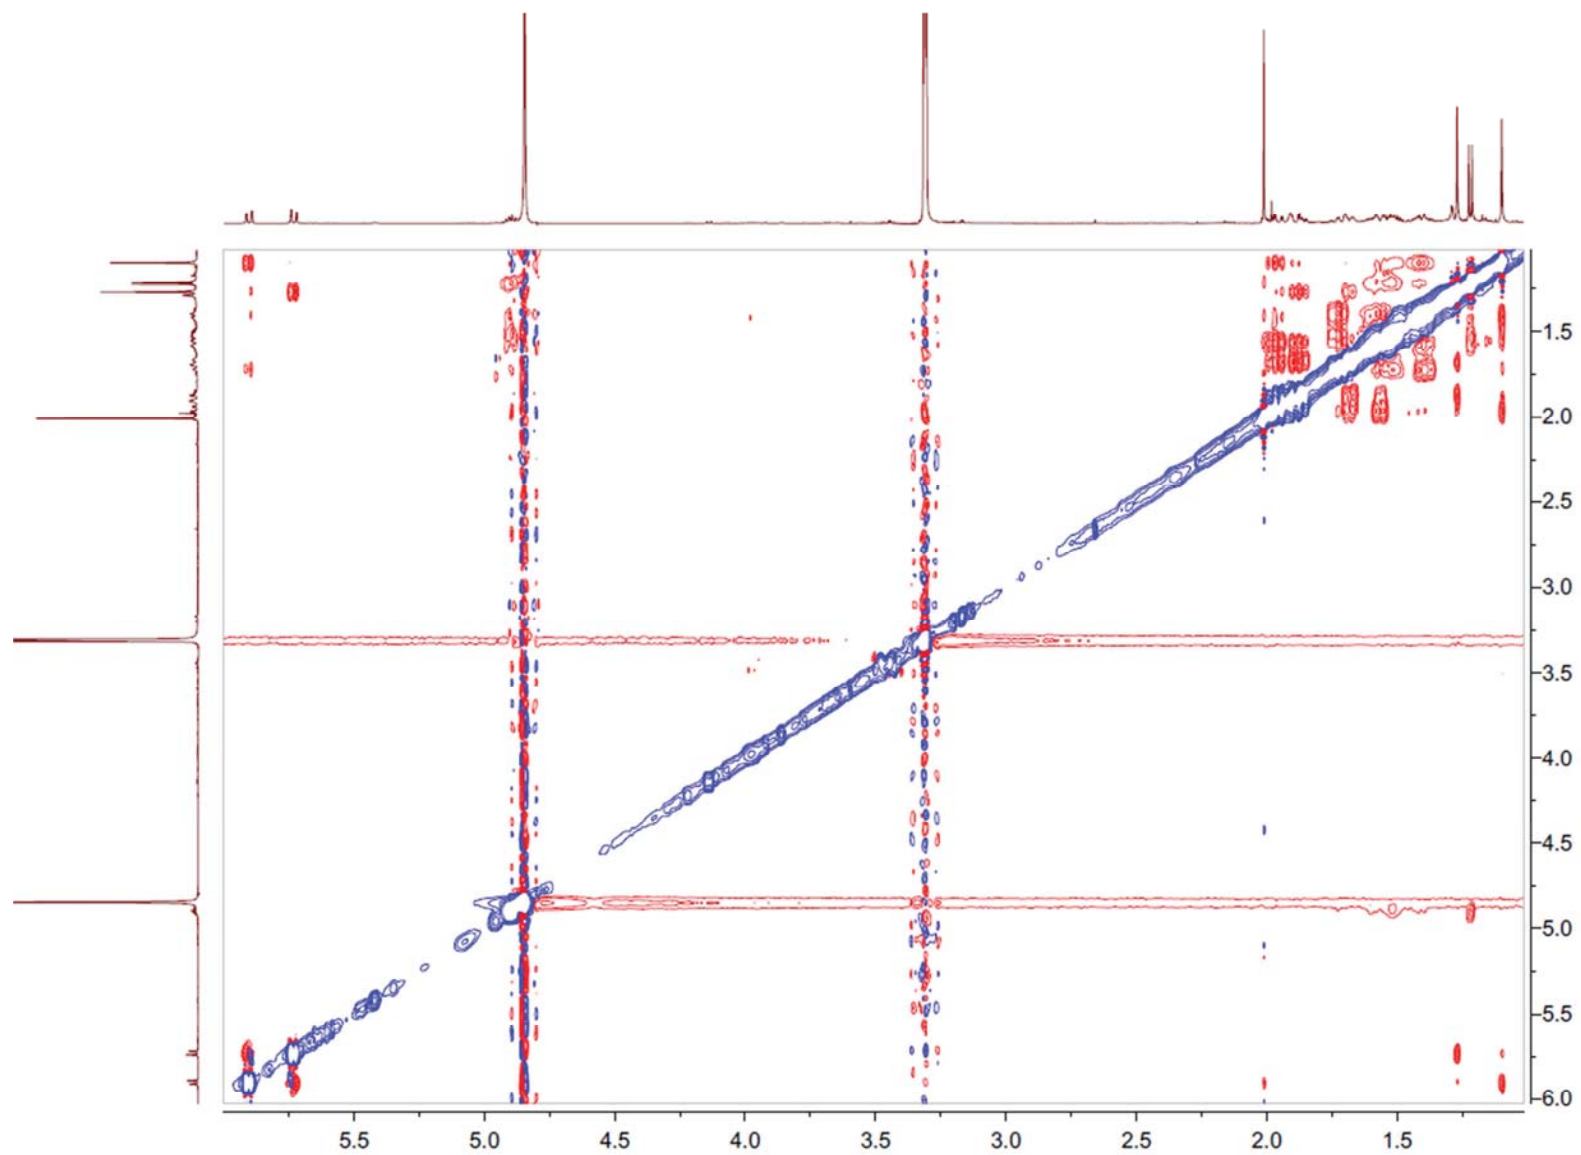

Figure S14. NOESY spectrum of compound 2 in CD<sub>3</sub>OD.

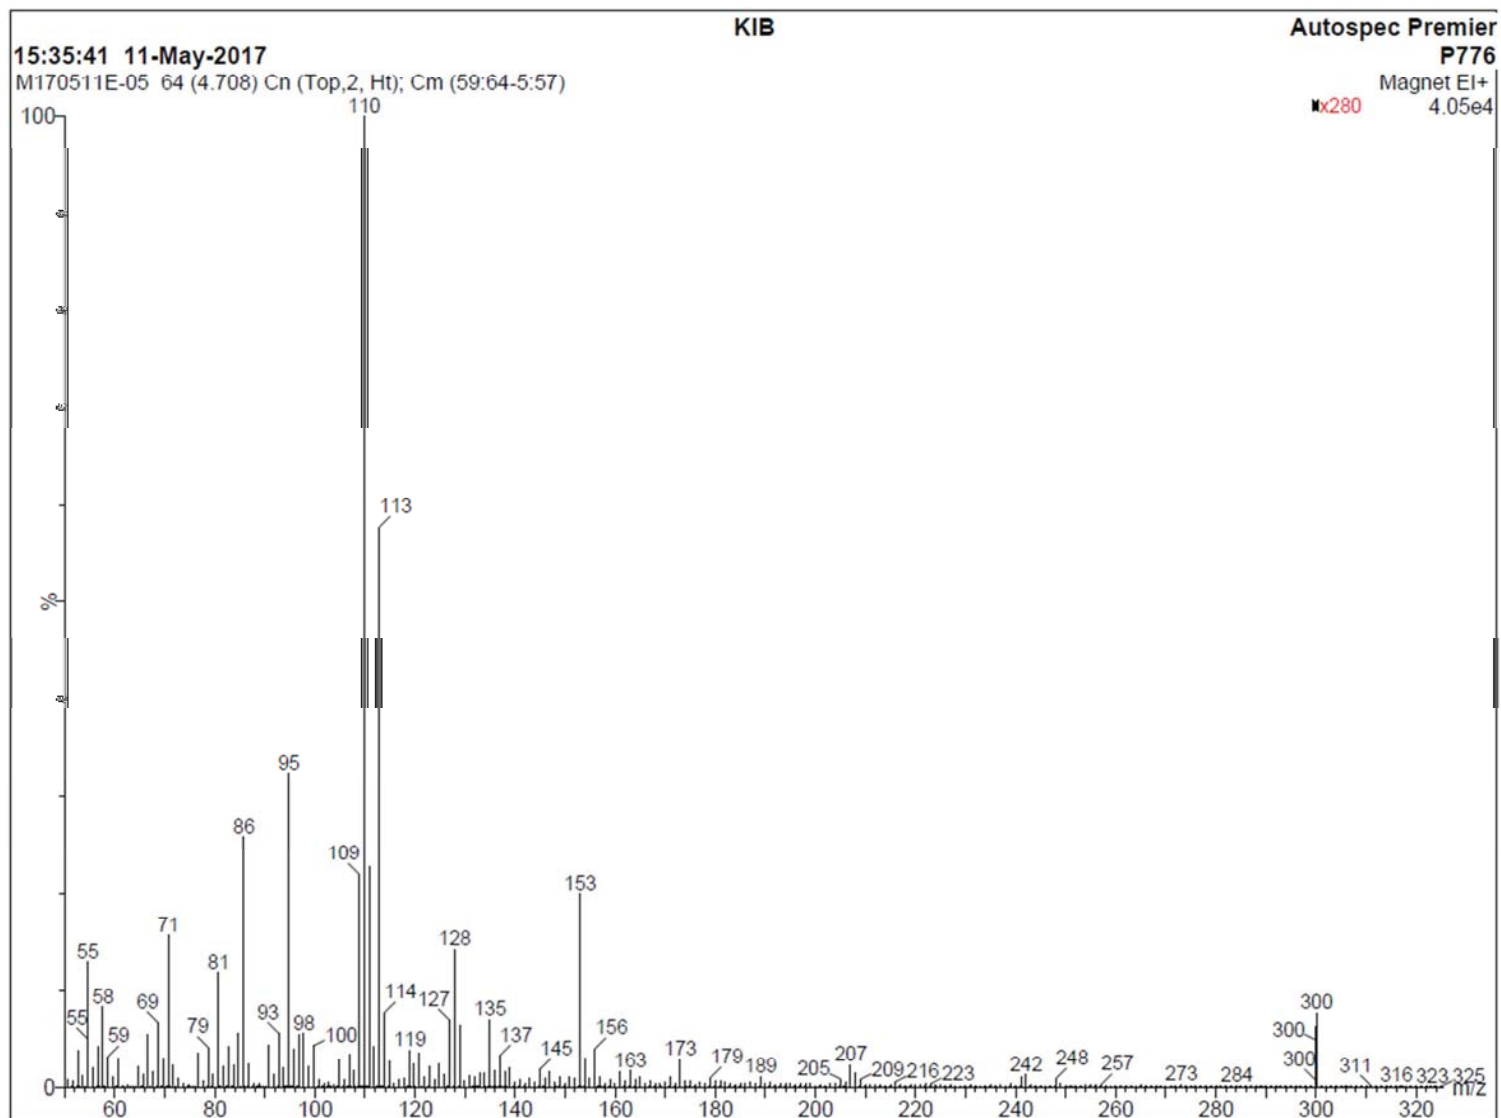

Figure S15. EIMS spectrum of compound 2.

### Single Mass Analysis

Tolerance = 10.0 PPM / DBE: min = -10.0, max = 120.0

Selected filters: None

Monoisotopic Mass, Odd and Even Electron Ions

15 formula(e) evaluated with 1 results within limits (up to 51 closest results for each mass)

Elements Used:

C: 0-200 H: 0-400 O: 4-6

17:38:53 11-May-2017

Voltage EI+

KIB  
M170511EA-05AFAMMA 25 (2.296)

Autospec Premier  
P776  
1

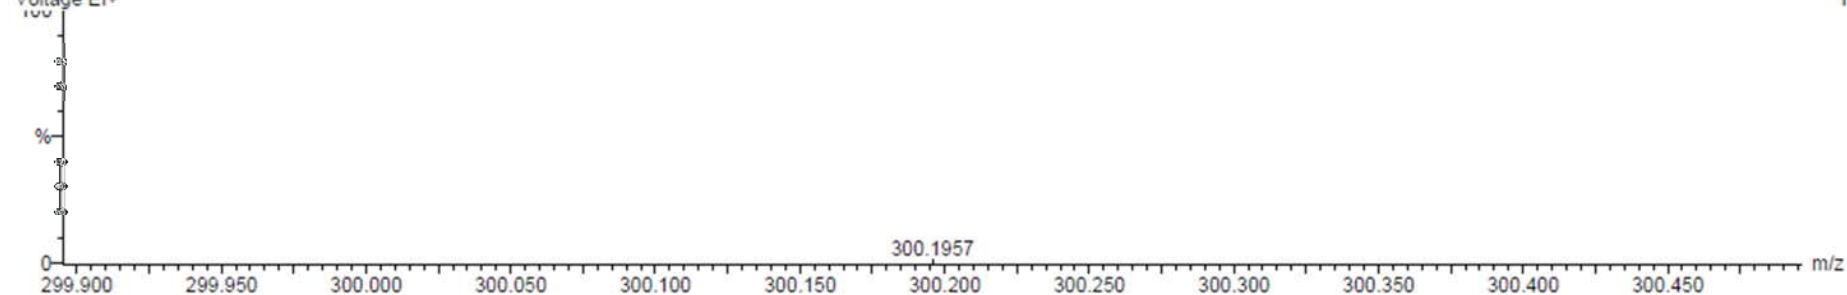

|          |            |      |     |       |           |            |
|----------|------------|------|-----|-------|-----------|------------|
| Minimum: |            |      |     | -10.0 |           |            |
| Maximum: | 10.0       | 10.0 |     | 120.0 |           |            |
| Mass     | Calc. Mass | mDa  | PPM | DBE   | i-FIT     | Formula    |
| 300.1957 | 300.1937   | 2.0  | 6.7 | 3.0   | 5546026.0 | C16 H28 O5 |

Figure S16. HREIMS spectrum of compound 2.

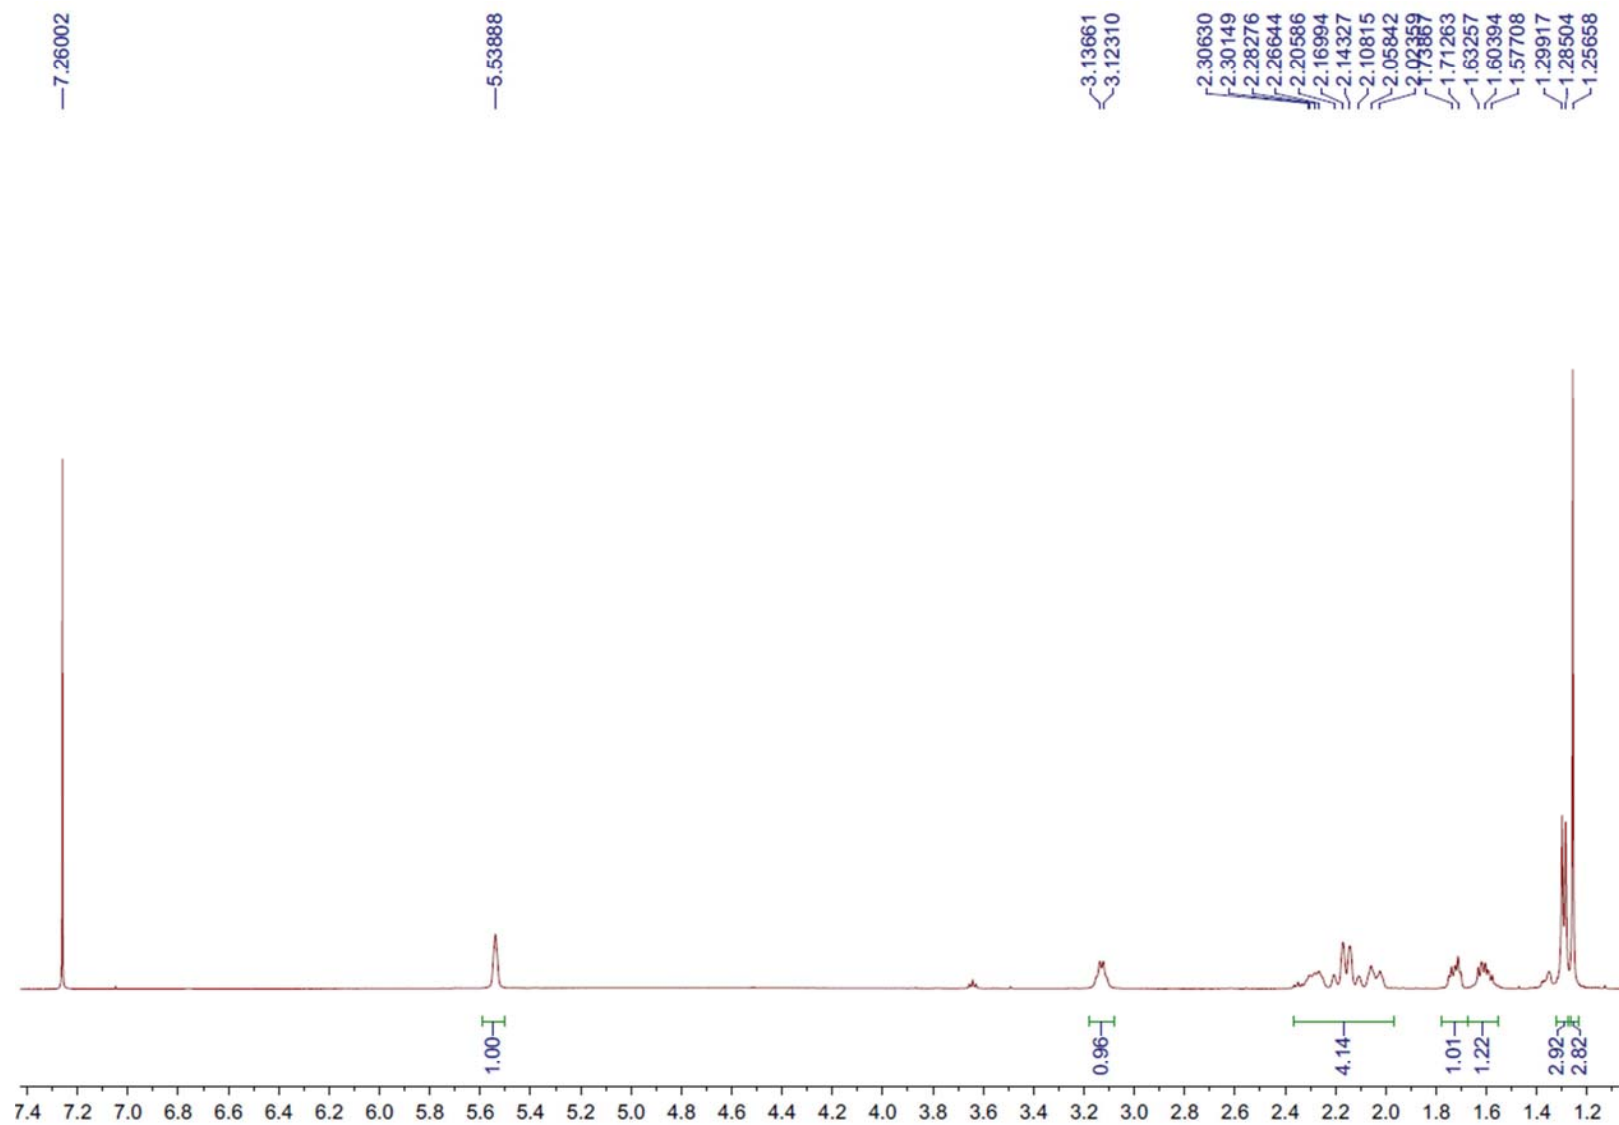

**Figure S17.**  $^1\text{H}$  NMR spectrum of compound **3** in  $\text{CDCl}_3$ .

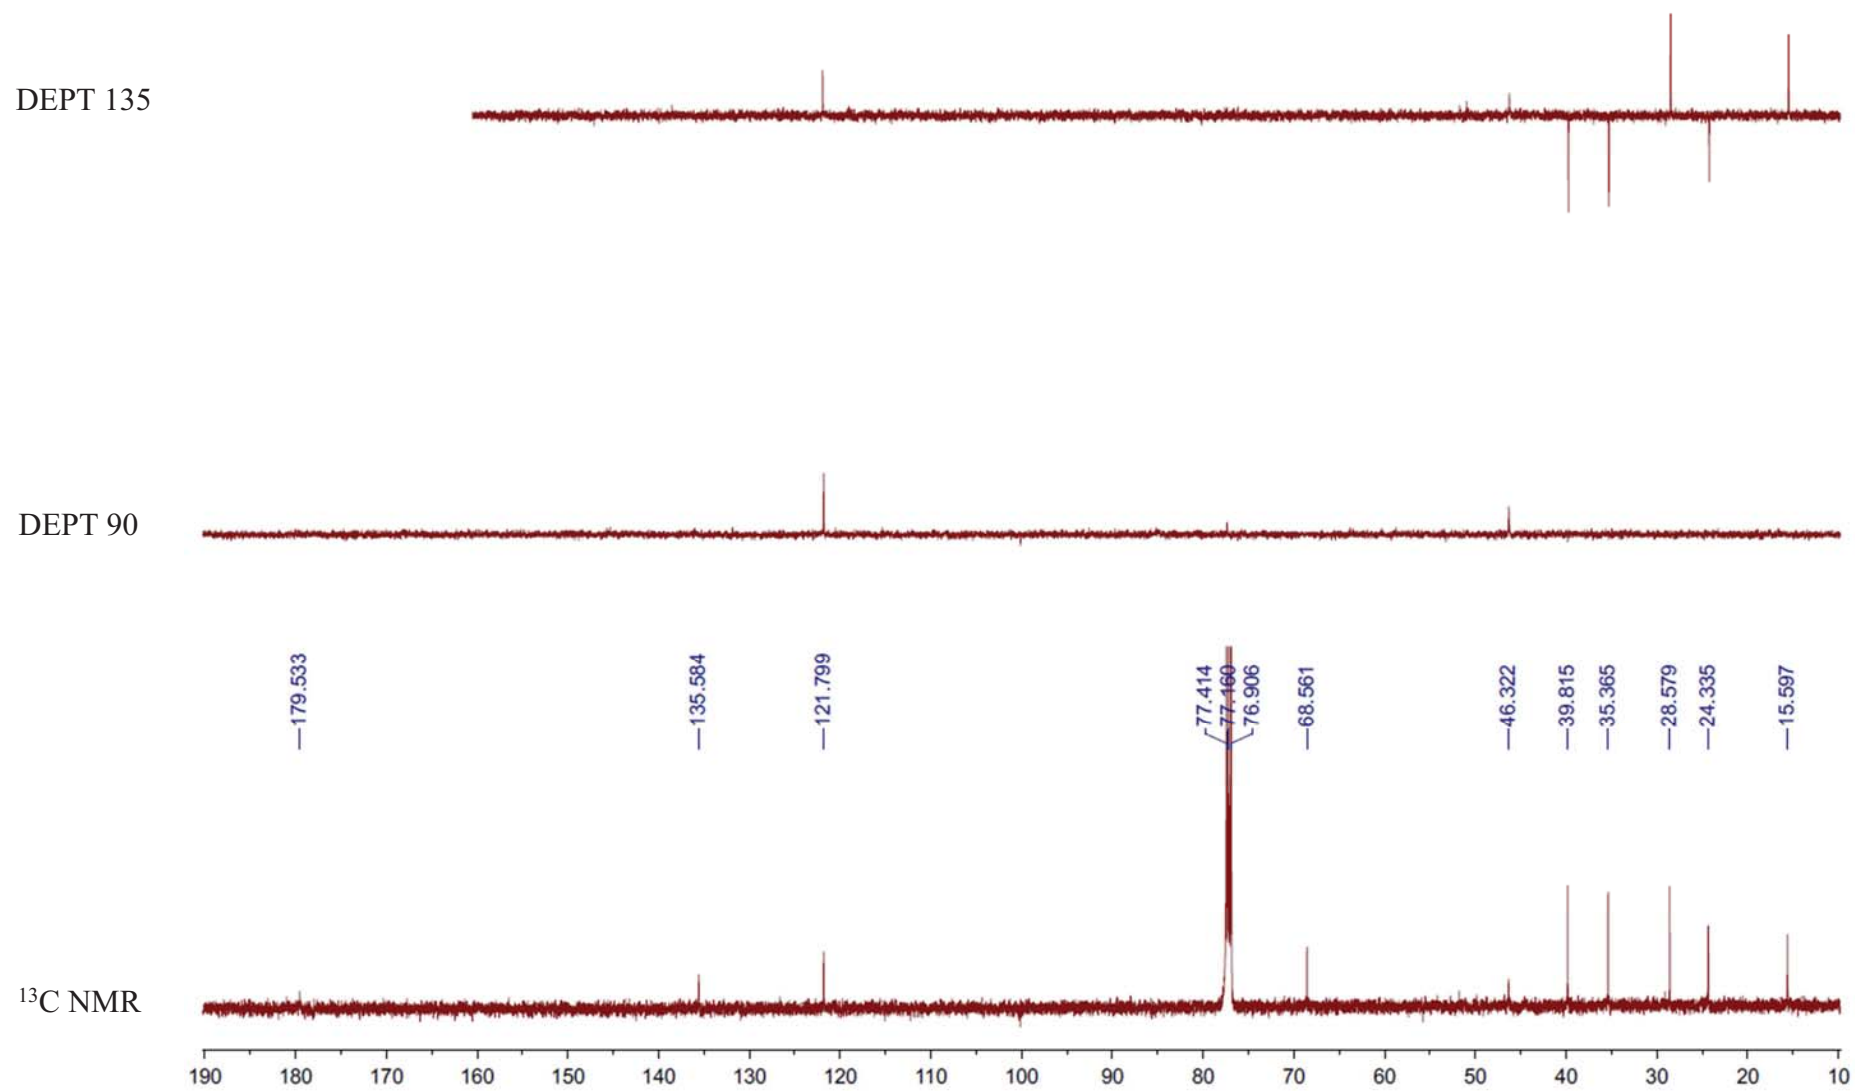

**Figure S18.**  $^{13}\text{C}$  NMR and DEPT spectra of compound **3** in  $\text{CDCl}_3$ .

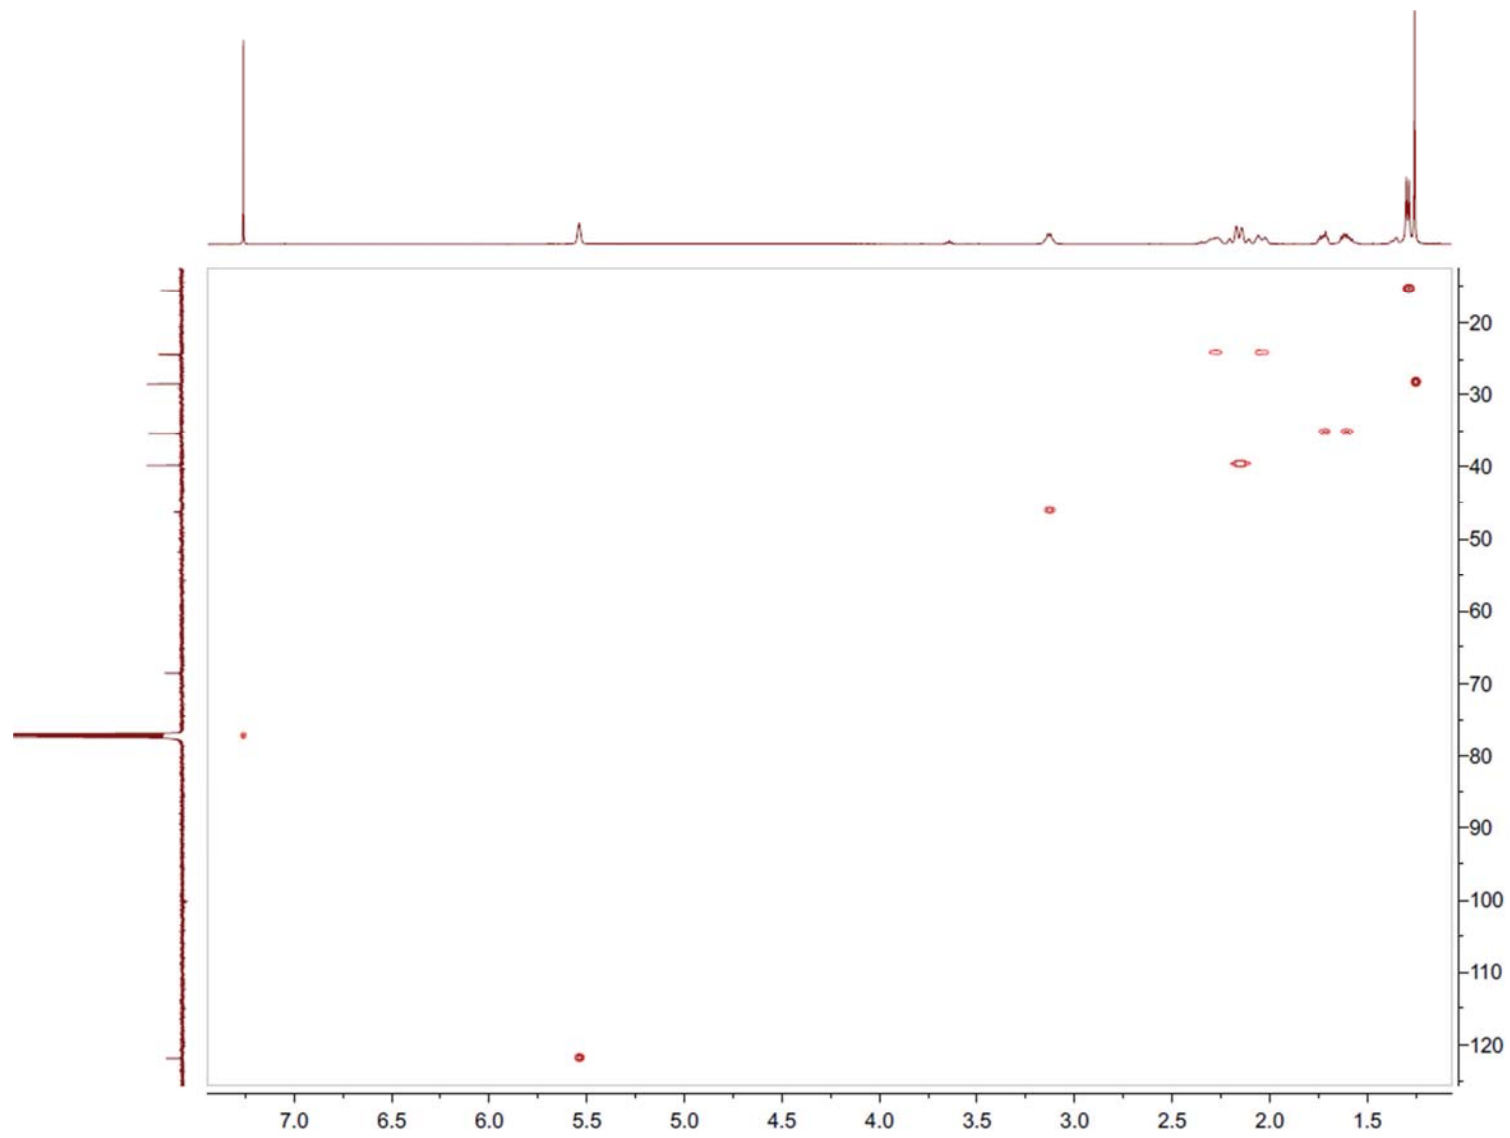

**Figure S19.** HSQC spectrum of compound **3** in CDCl<sub>3</sub>.

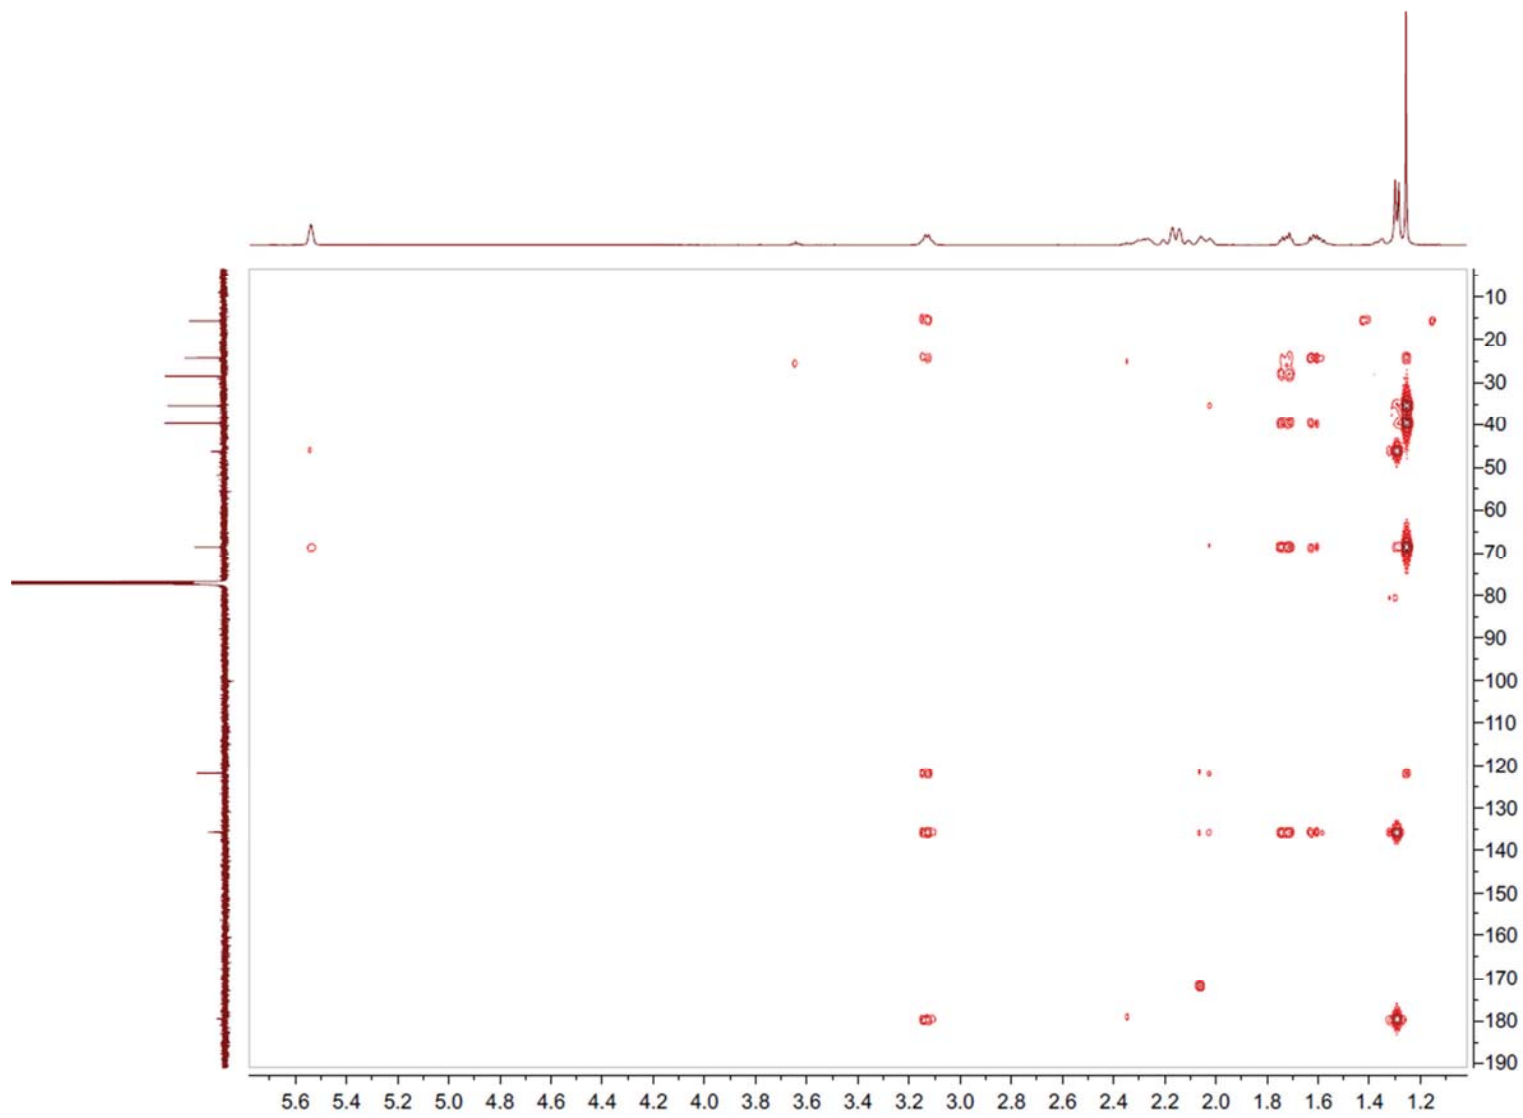

**Figure S20.** HMBC spectrum of compound **3** in CDCl<sub>3</sub>.

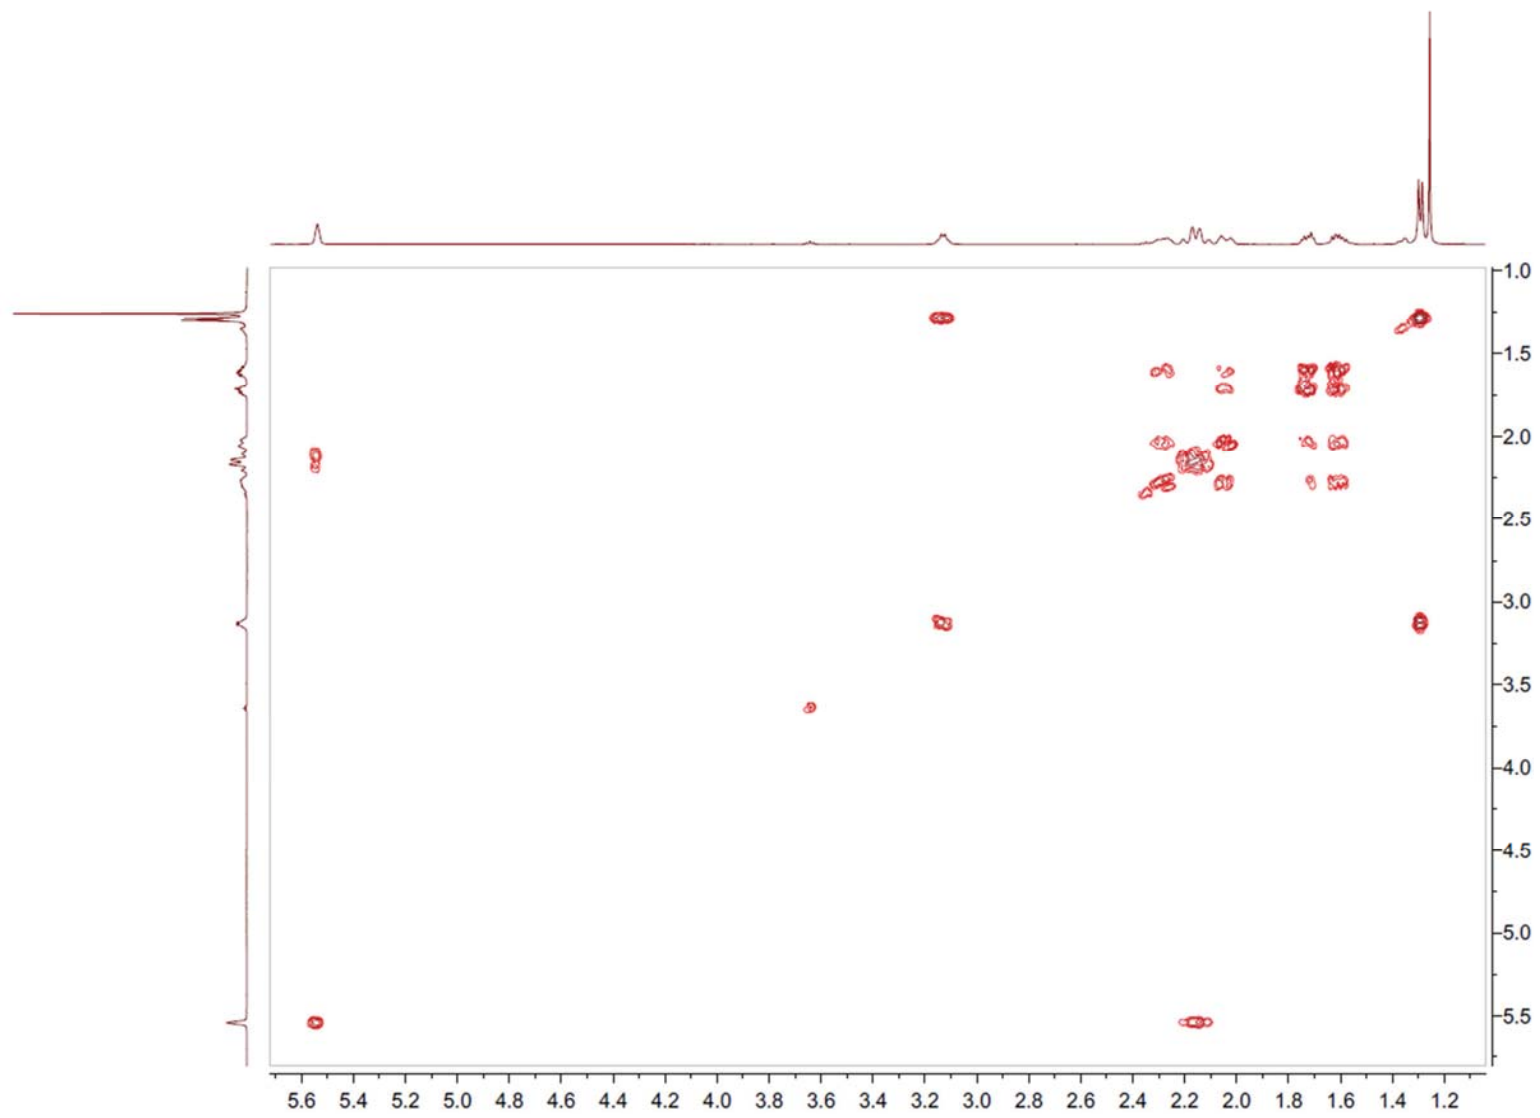

**Figure S21.** COSY spectrum of compound **3** in CDCl<sub>3</sub>.



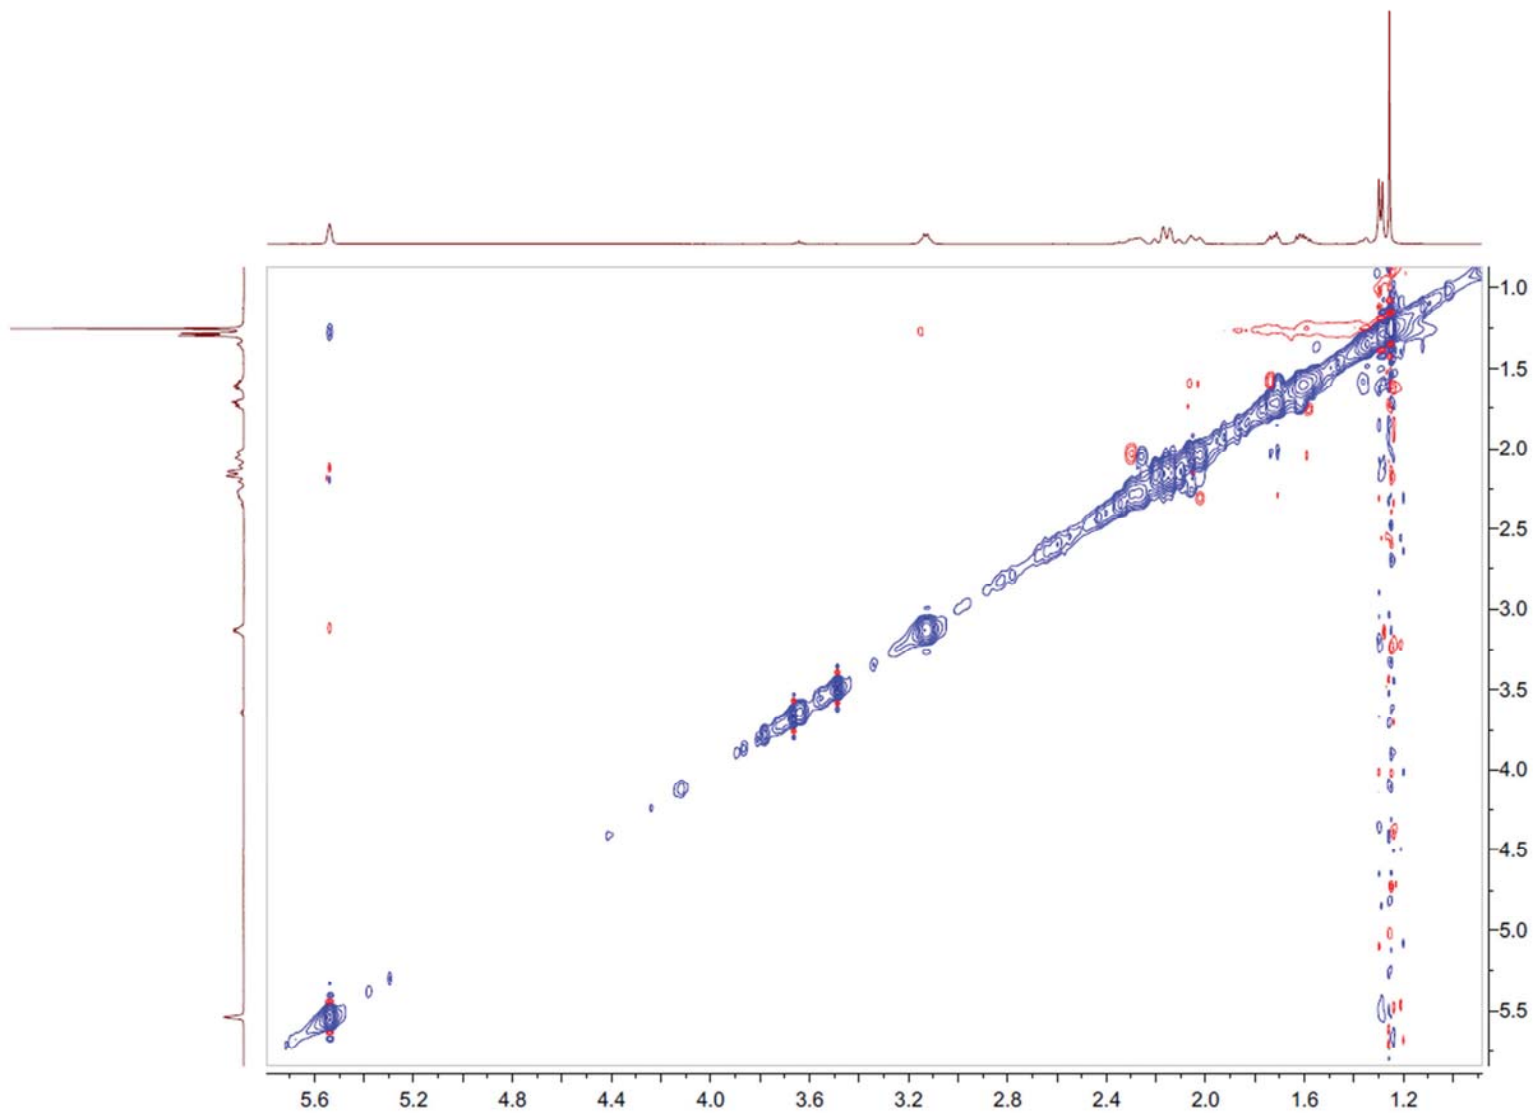

**Figure S22.** NOESY spectrum of compound **3** in CDCl<sub>3</sub>.

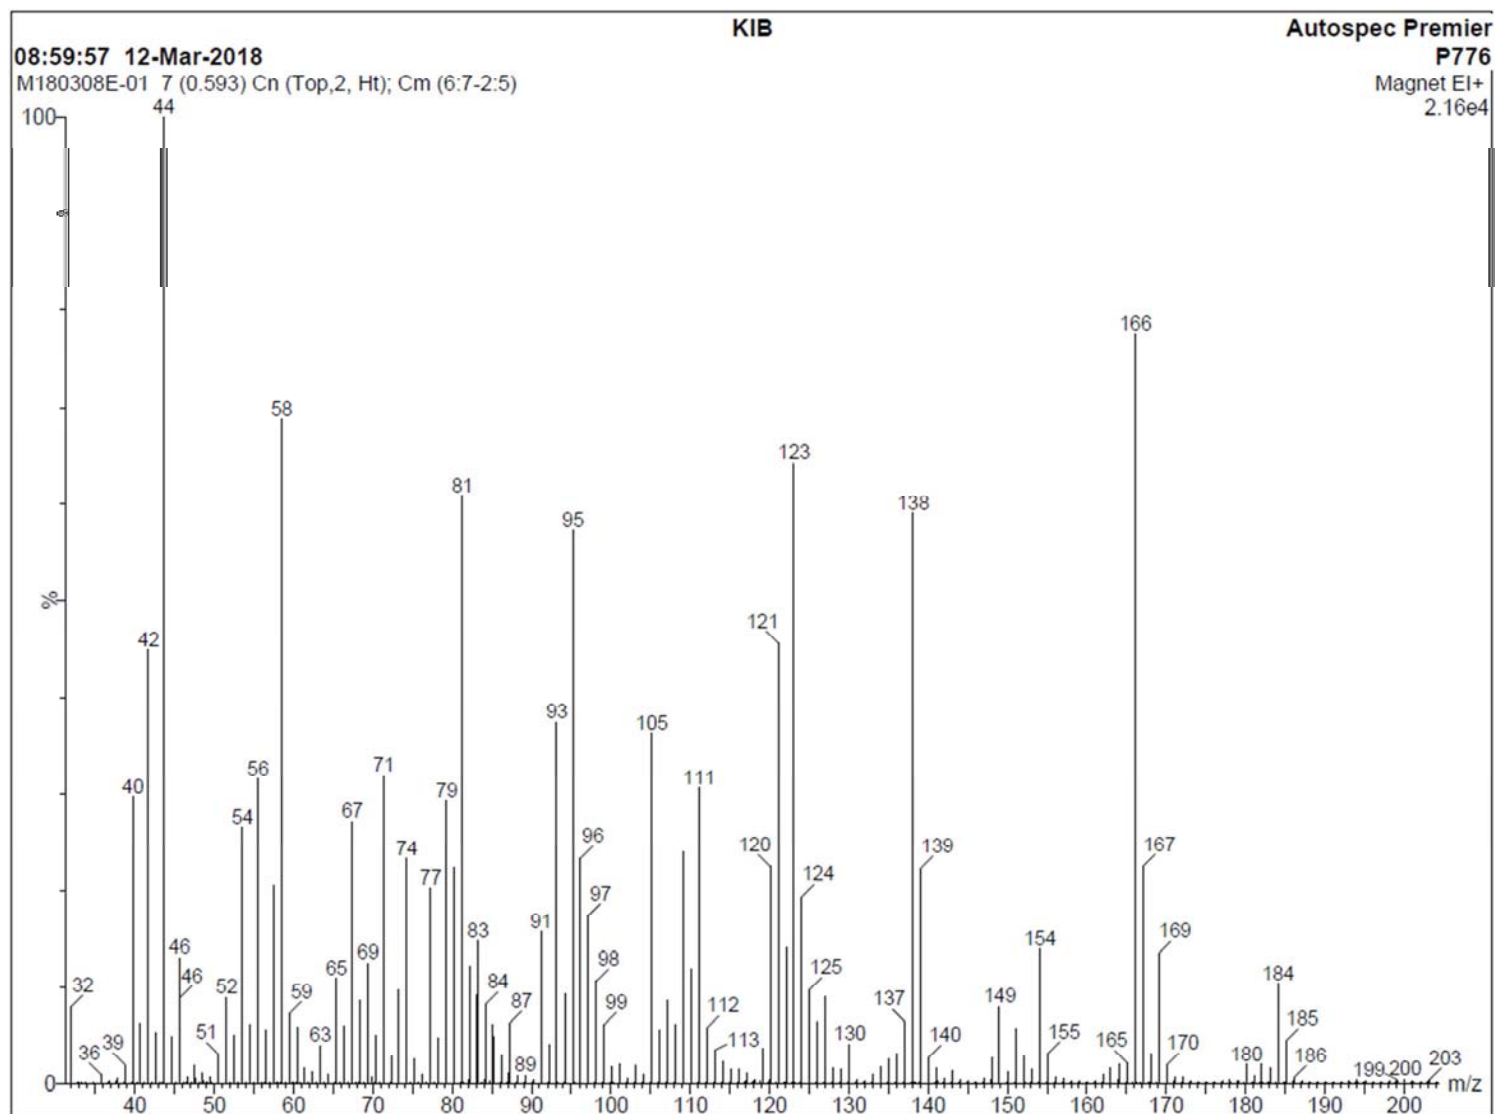

Figure S23. EIMS spectrum of compound 3.

### Single Mass Analysis

Tolerance = 10.0 PPM / DBE: min = -10.0, max = 120.0

Selected filters: None

Monoisotopic Mass, Odd and Even Electron Ions

12 formula(e) evaluated with 1 results within limits (up to 51 closest results for each mass)

Elements Used:

C: 0-200 H: 0-400 O: 2-4

10:43:27 12-Mar-2018

Voltage EI+

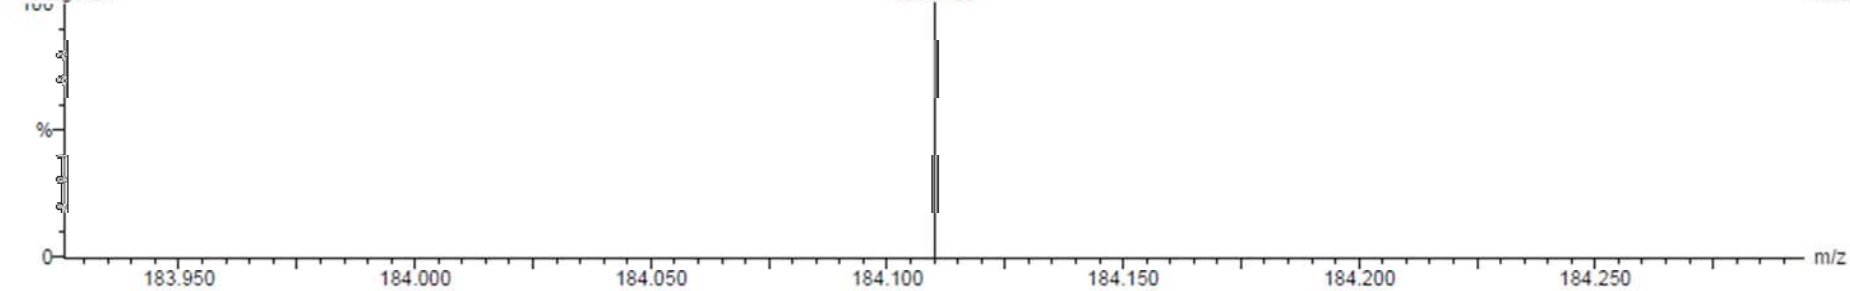

Autospec Premier  
P776  
4.22

|          |            |      |     |       |           |            |
|----------|------------|------|-----|-------|-----------|------------|
| Minimum: |            |      |     | -10.0 |           |            |
| Maximum: | 200.0      | 10.0 |     | 120.0 |           |            |
| Mass     | Calc. Mass | mDa  | PPM | DBE   | i-FIT     | Formula    |
| 184.1100 | 184.1099   | 0.1  | 0.5 | 3.0   | 5546025.5 | C10 H16 O3 |

Figure S24. HREIMS spectrum of compound 3.

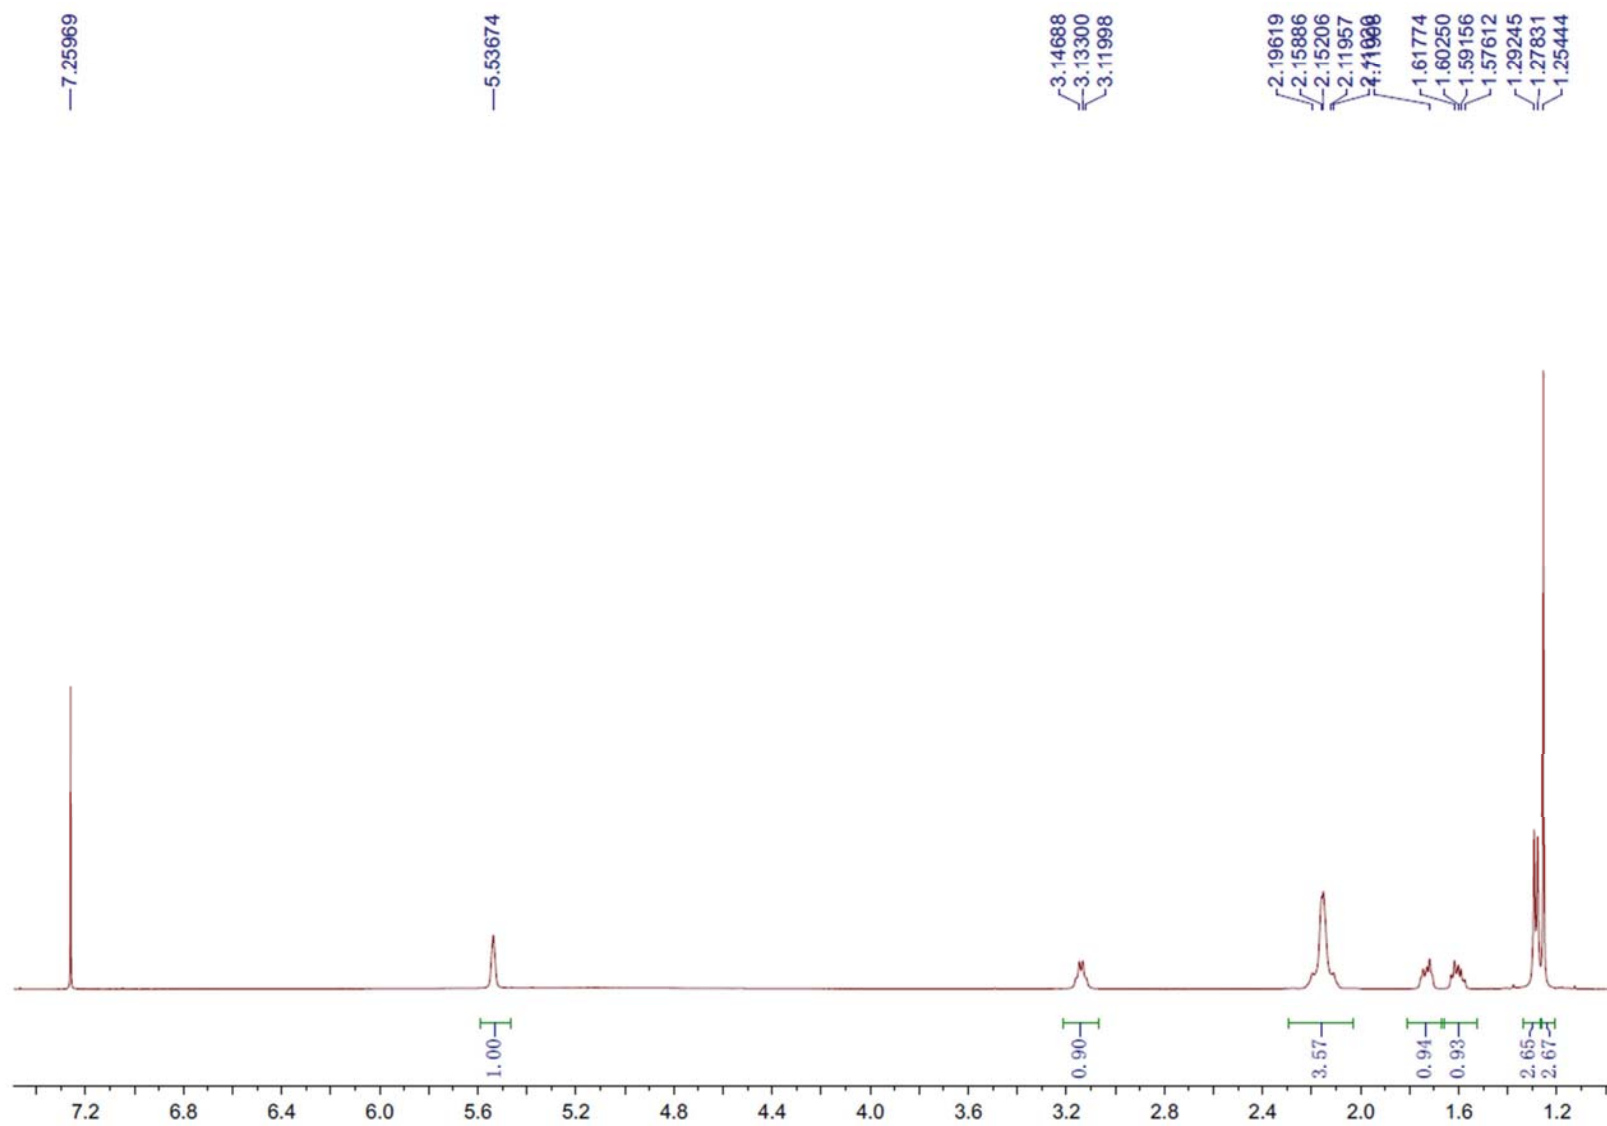

Figure S25.  $^1\text{H}$  NMR spectrum of compound 4 in  $\text{CDCl}_3$ .

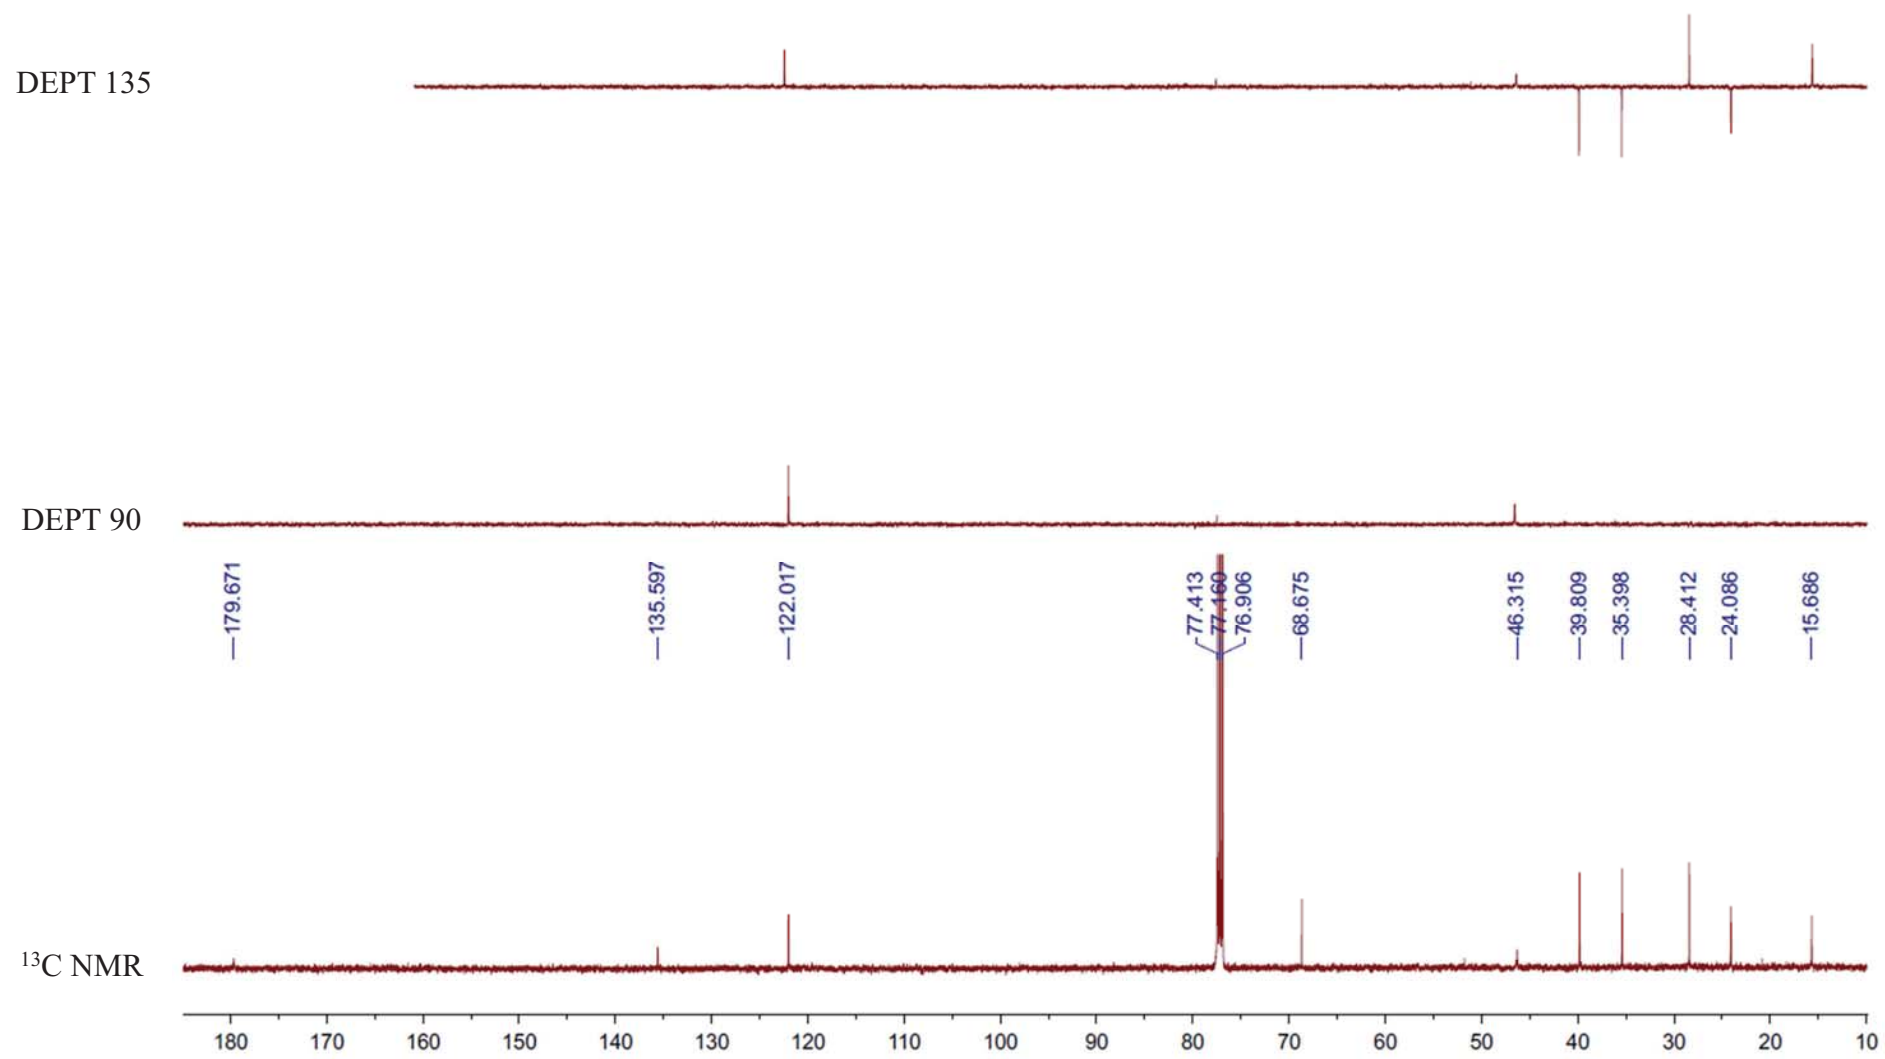

Figure S26.  $^{13}\text{C}$  NMR and DEPT spectra of compound 4 in  $\text{CDCl}_3$ .

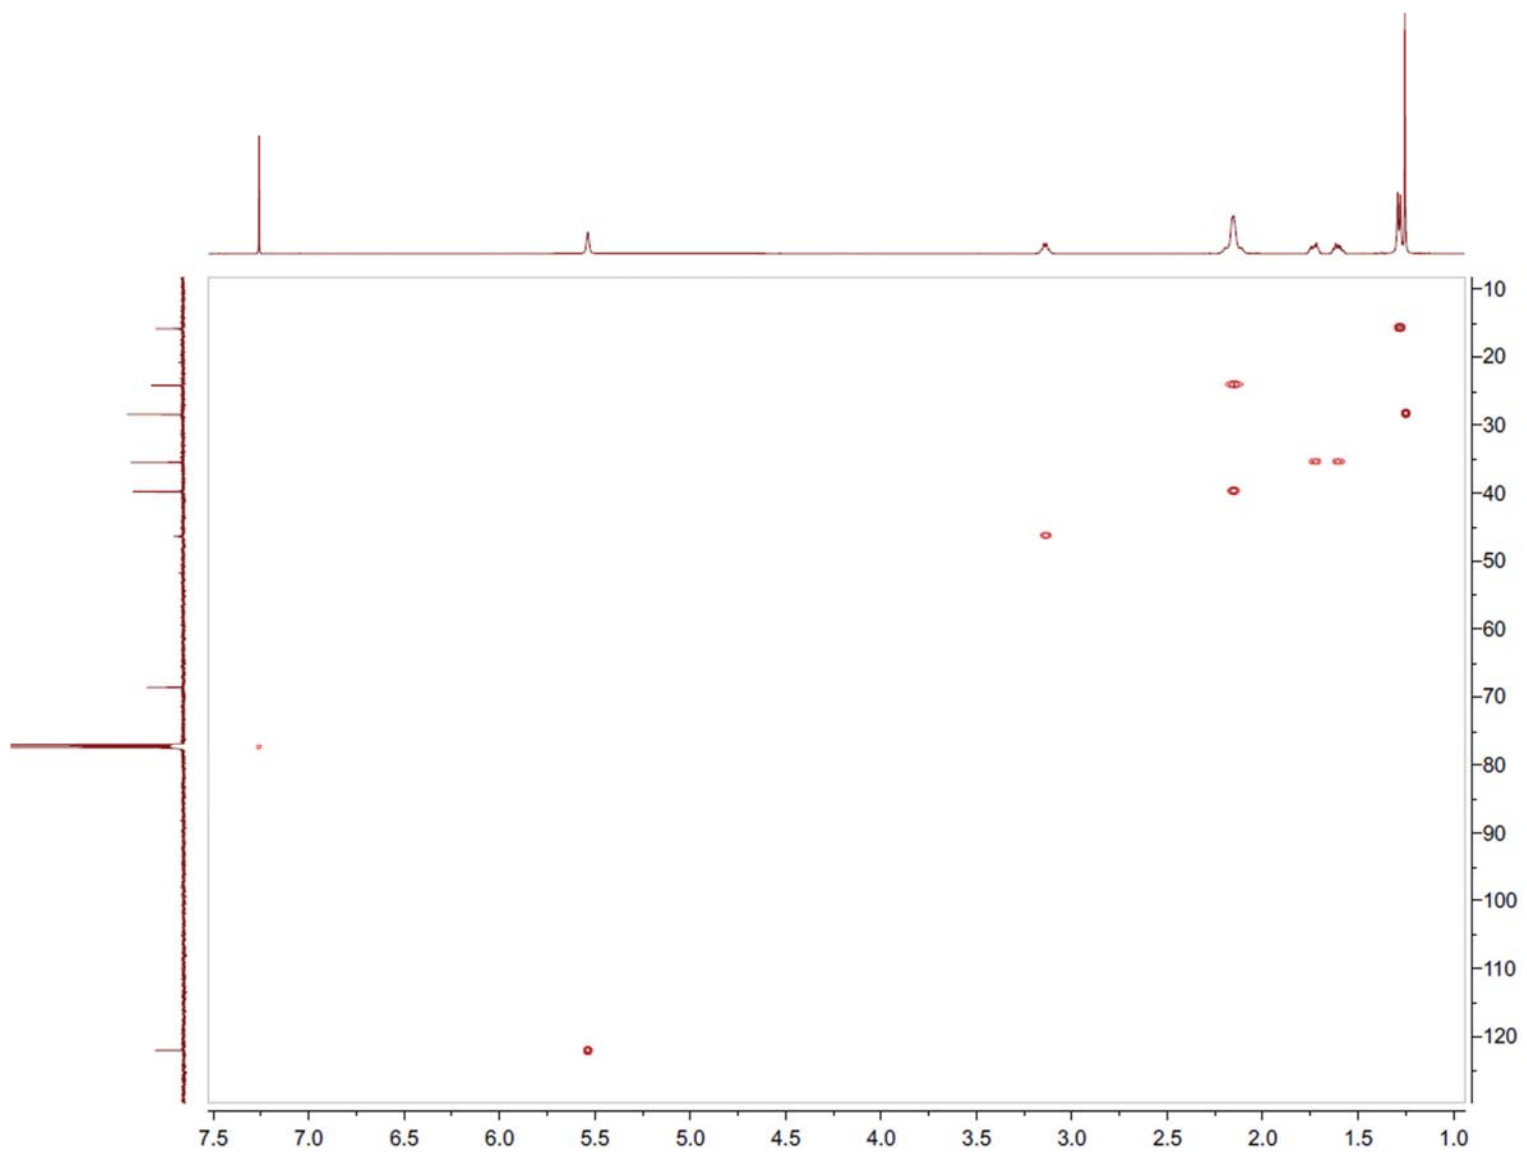

**Figure S27.** HSQC spectrum of compound **4** in  $\text{CDCl}_3$ .

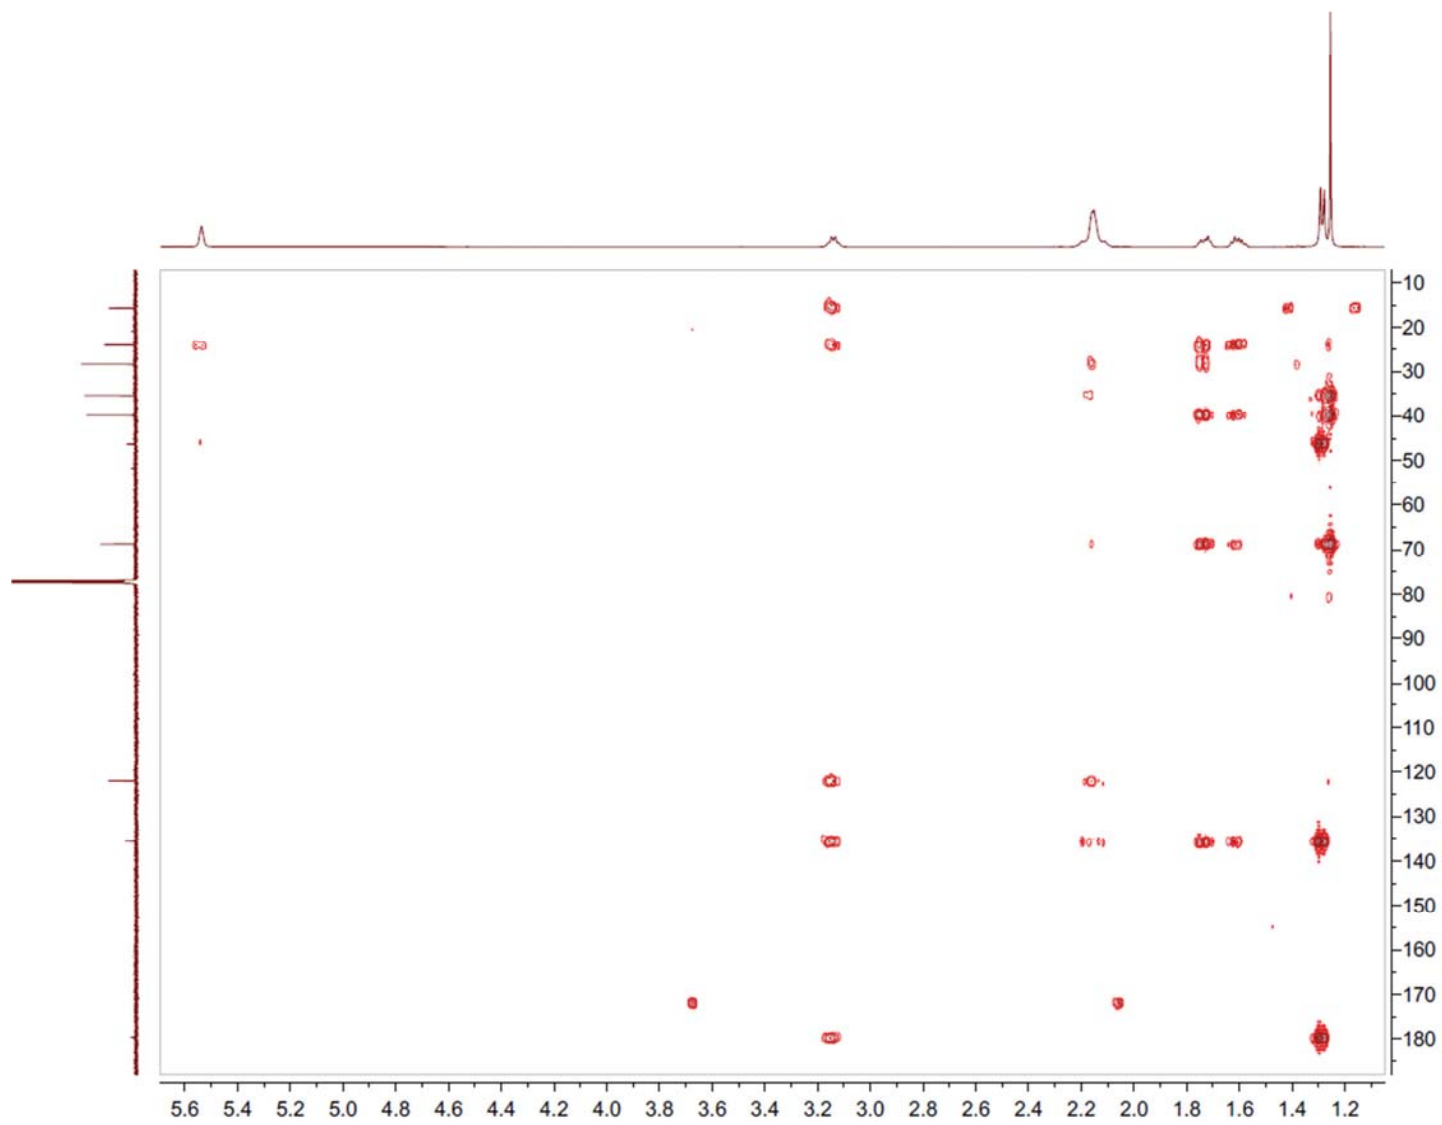

**Figure S28.** HMBC spectrum of compound **4** in  $\text{CDCl}_3$ .

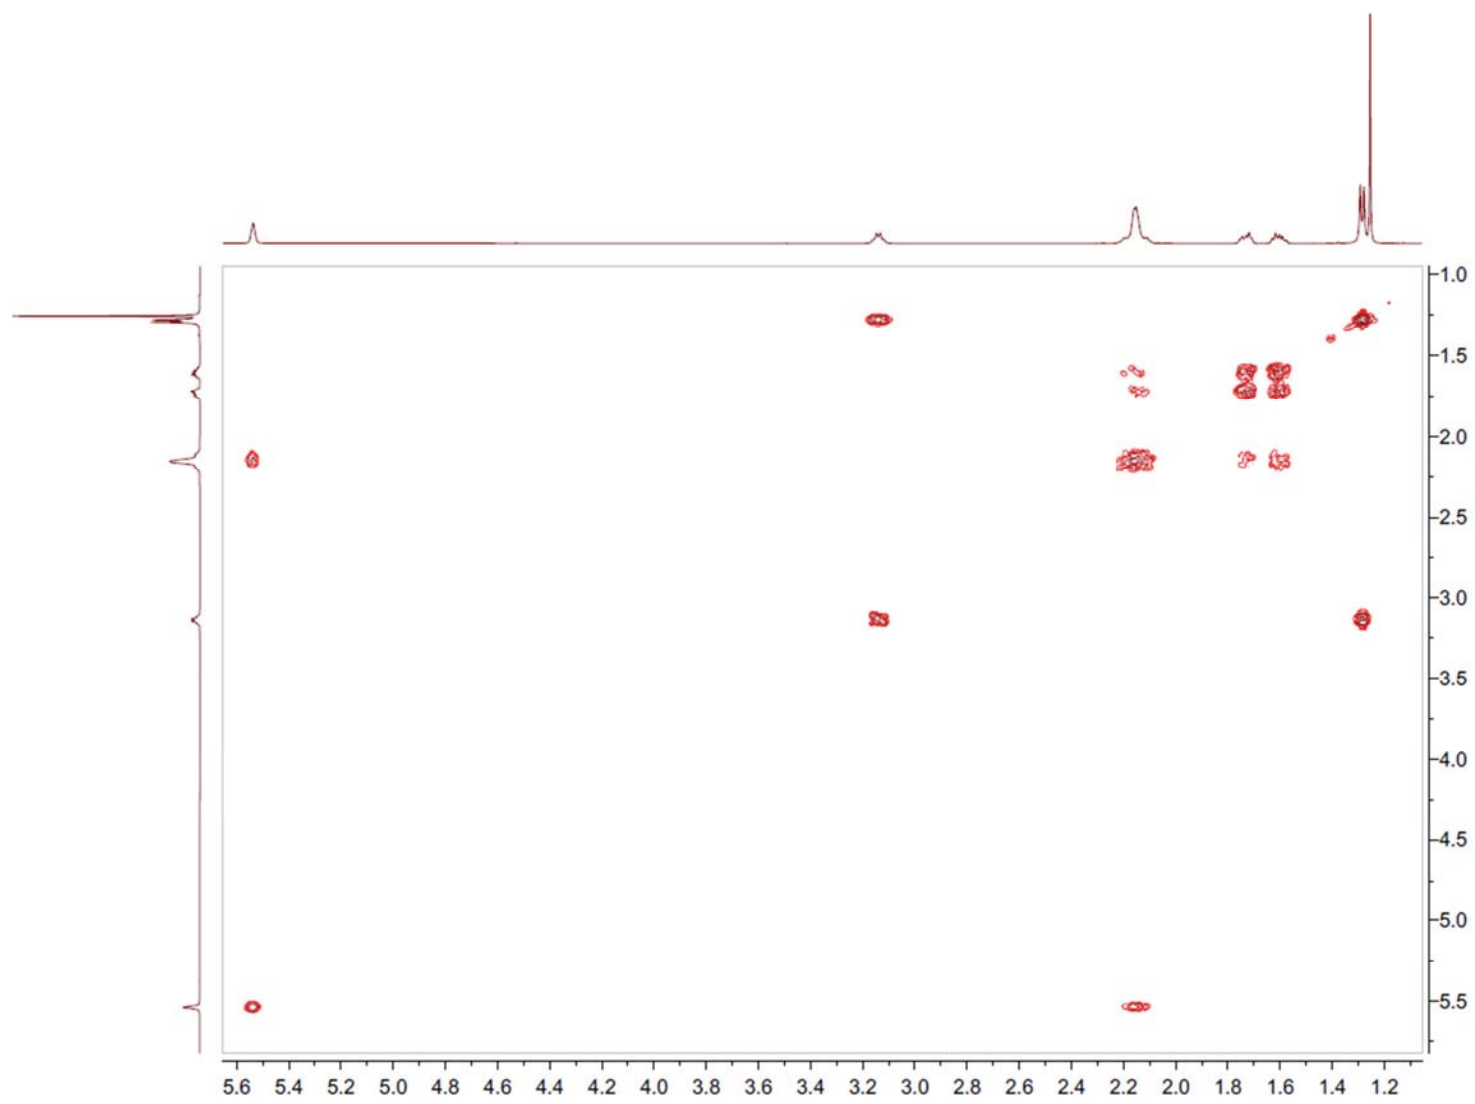

**Figure S29.** COSY spectrum of compound 4 in CDCl<sub>3</sub>.



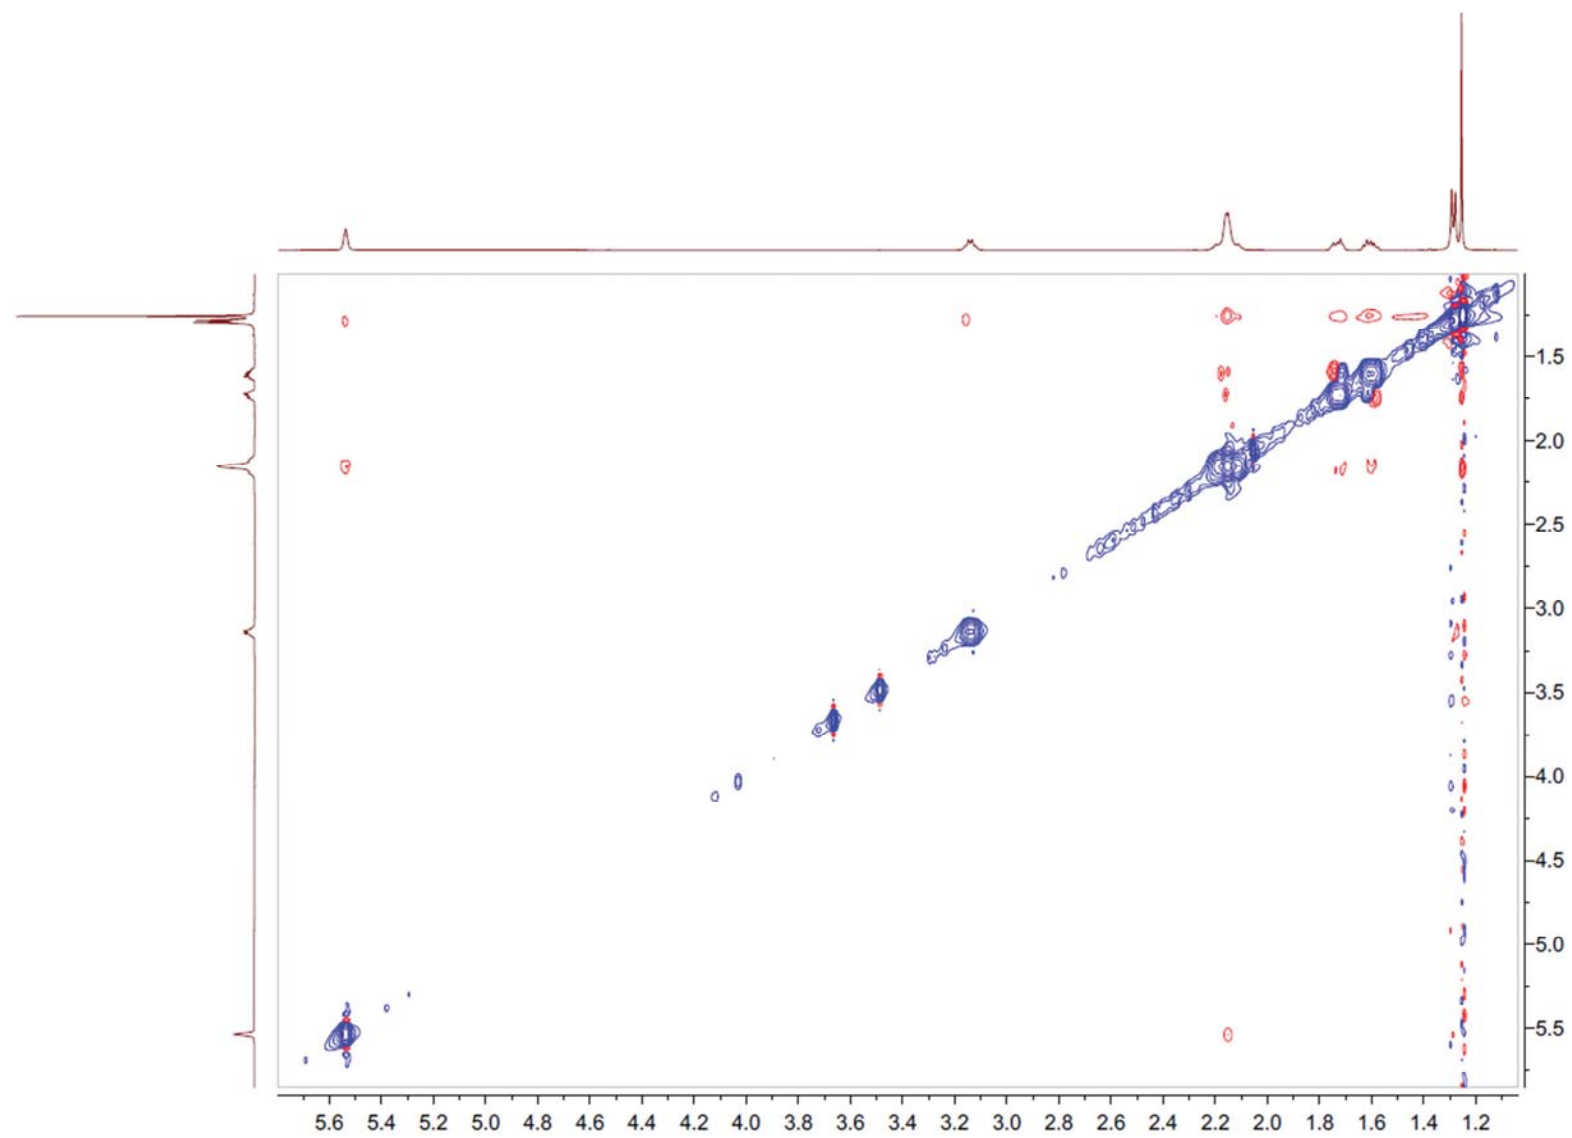

**Figure S30.** NOESY spectrum of compound **4** in CDCl<sub>3</sub>.

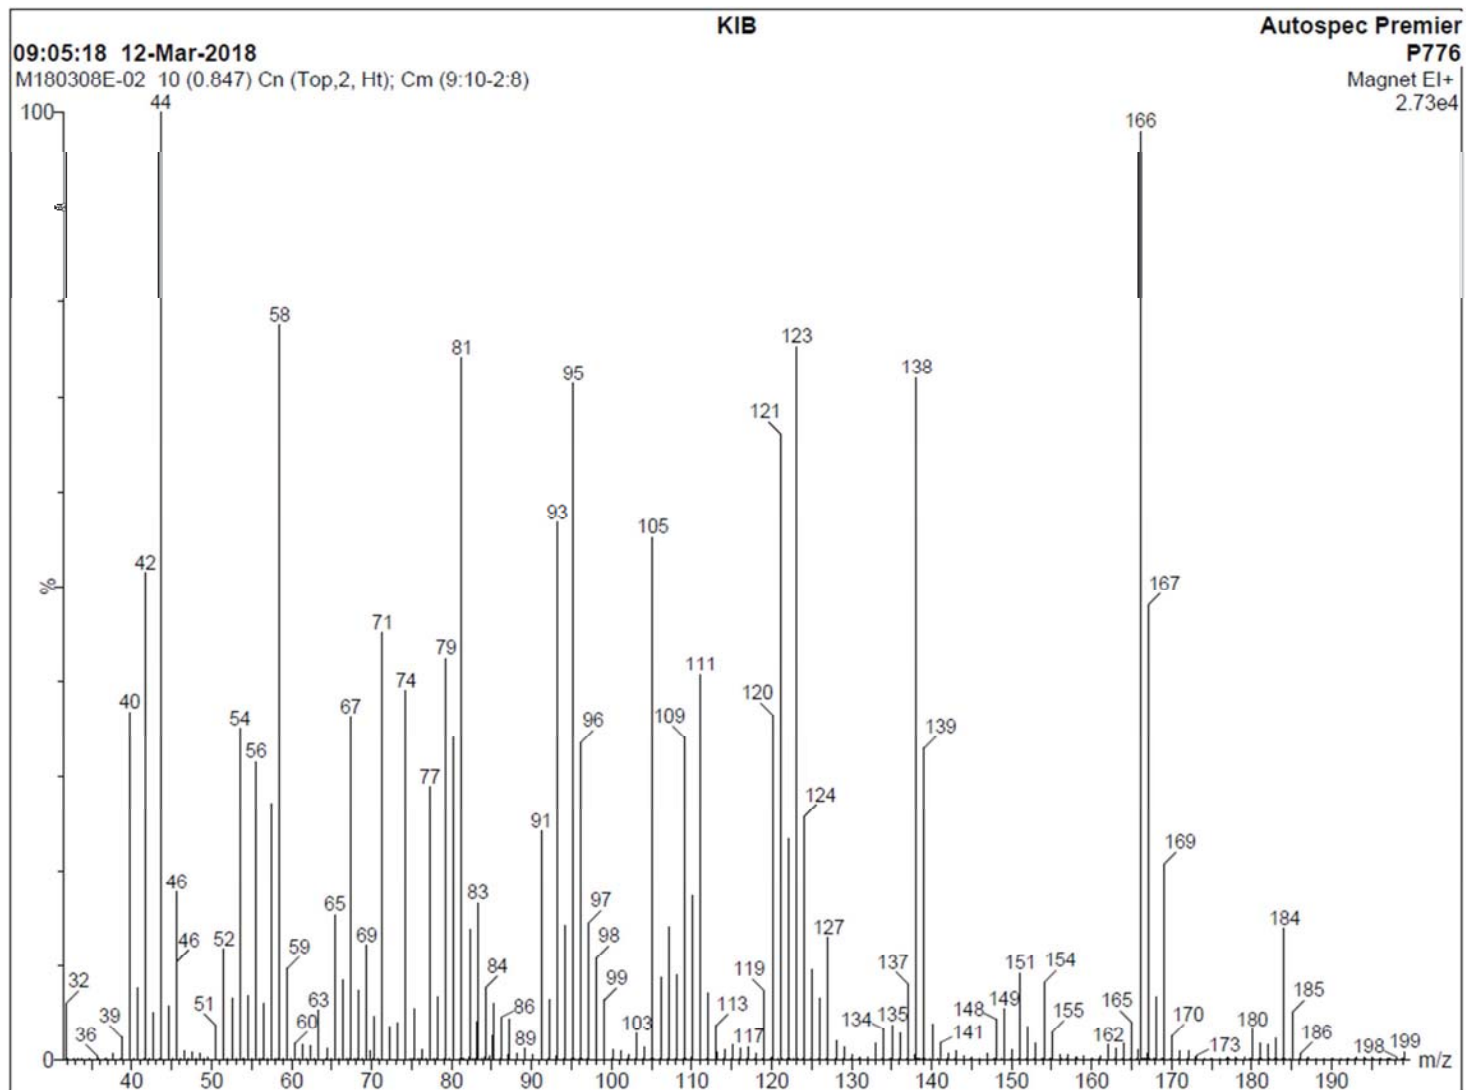

Figure S31. EIMS spectrum of compound 4.

### Single Mass Analysis

Tolerance = 10.0 PPM / DBE: min = -10.0, max = 120.0

Selected filters: None

Monoisotopic Mass, Odd and Even Electron Ions

12 formula(e) evaluated with 1 results within limits (up to 51 closest results for each mass)

Elements Used:

C: 0-200 H: 0-400 O: 2-4

10:32:47 12-Mar-2018

Voltage EI+

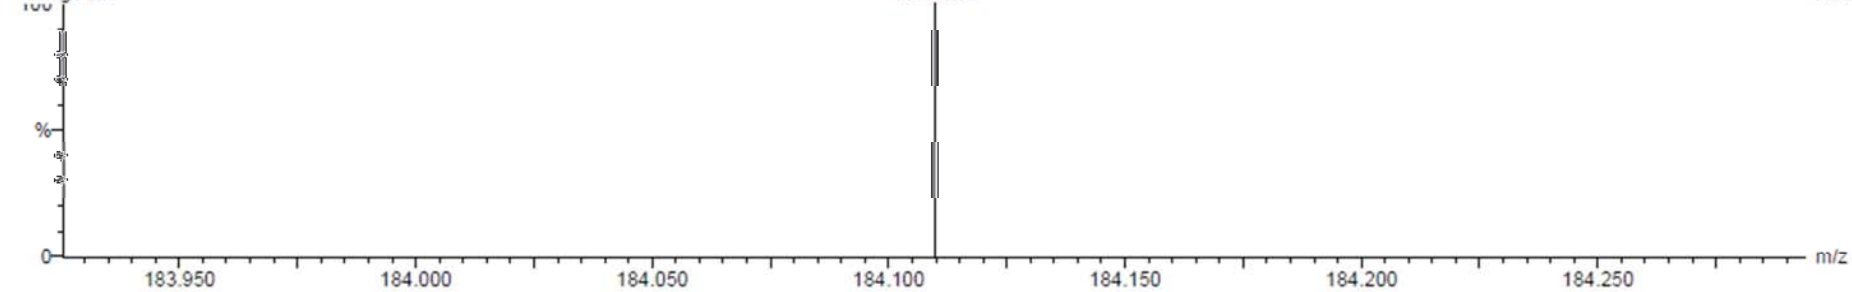

Autospec Premier  
P776  
7.22

Minimum: -10.0  
Maximum: 200.0 10.0 120.0

| Mass     | Calc. Mass | mDa  | PPM  | DBE | i-FIT     | Formula    |
|----------|------------|------|------|-----|-----------|------------|
| 184.1097 | 184.1099   | -0.2 | -1.1 | 3.0 | 5546025.5 | C10 H16 O3 |

Figure S32. HREIMS spectrum of compound 4.

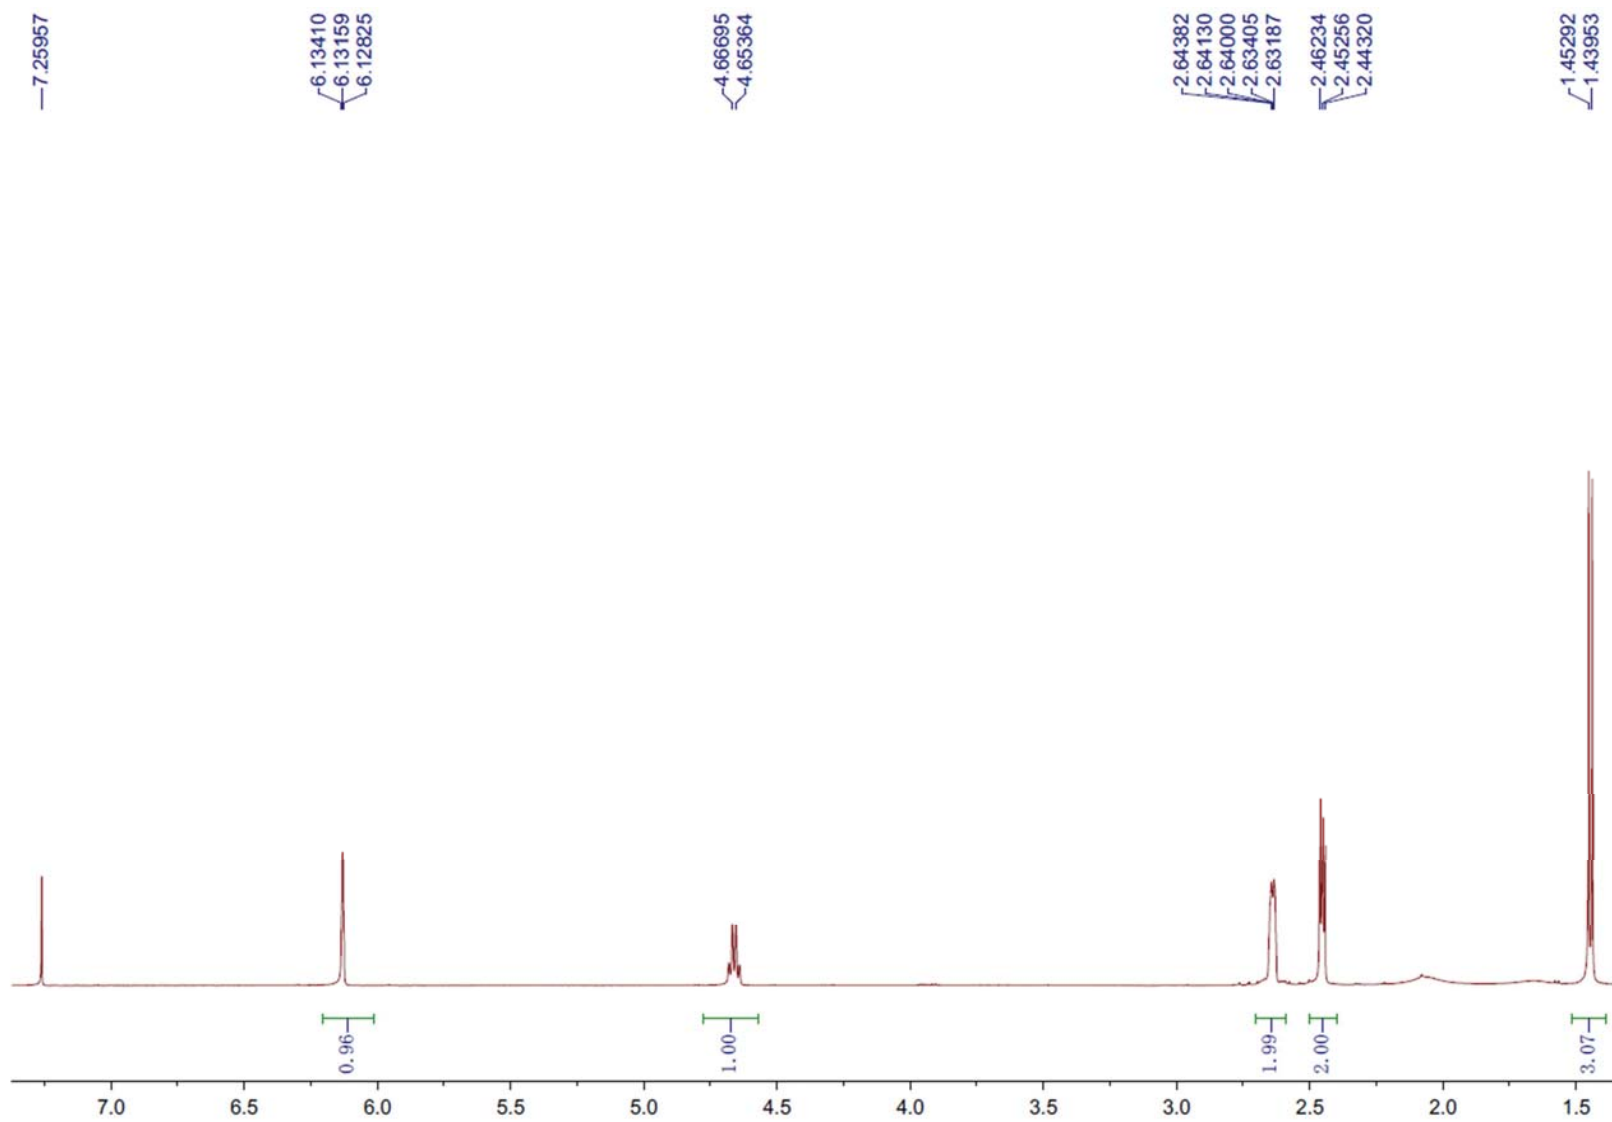

Figure S33.  $^1\text{H}$  NMR spectrum of compound **5** in  $\text{CDCl}_3$ .

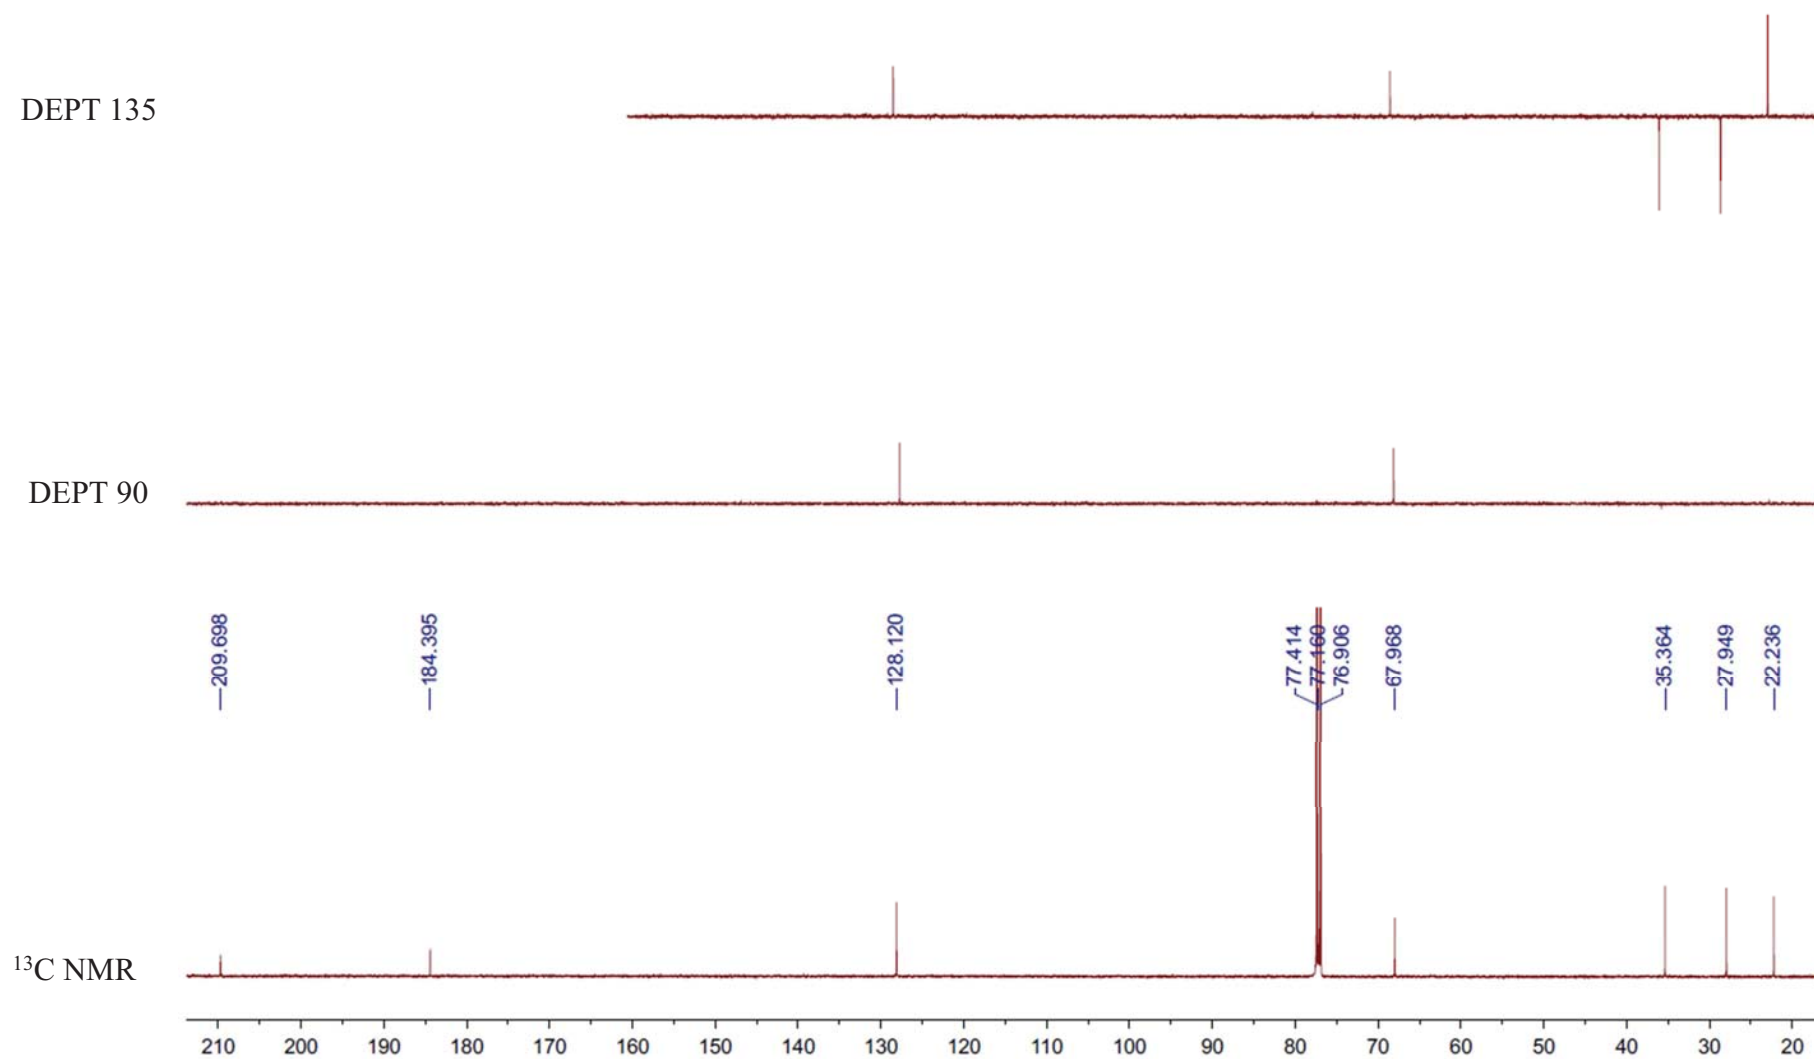

**Figure S34.**  $^{13}\text{C}$  NMR and DEPT spectra of compound **5** in  $\text{CDCl}_3$ .

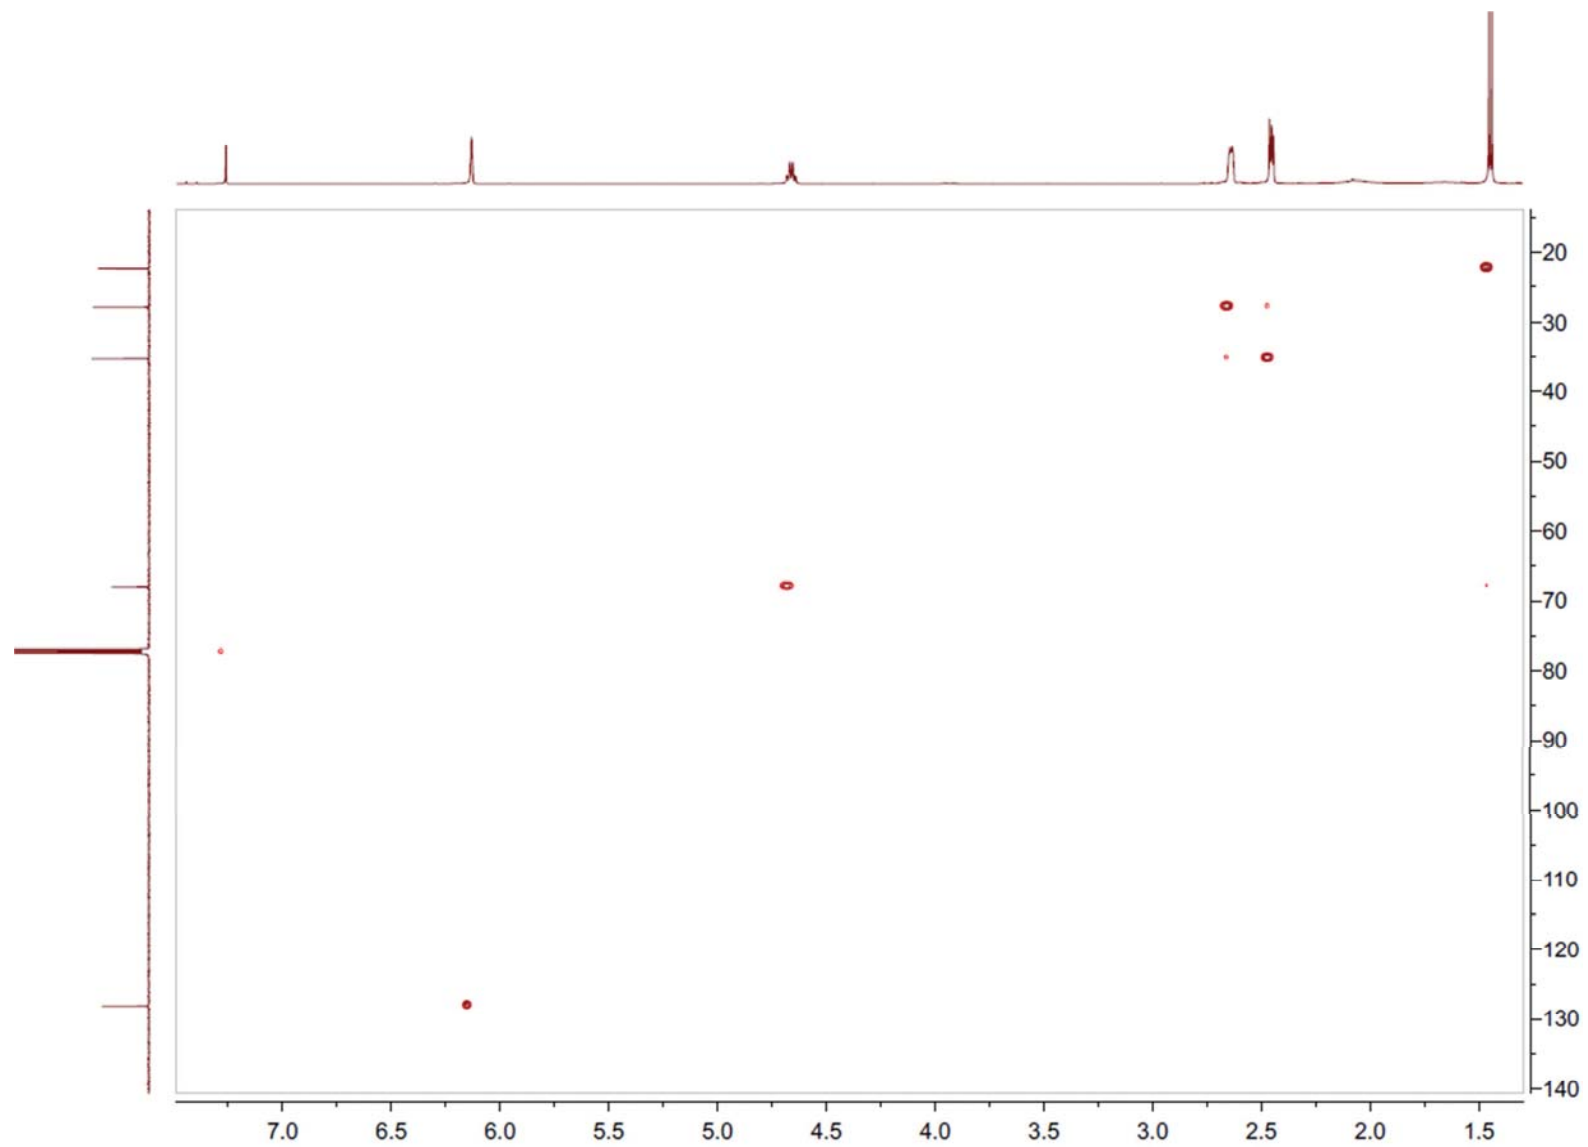

**Figure S35.** HSQC spectrum of compound **5** in CDCl<sub>3</sub>.

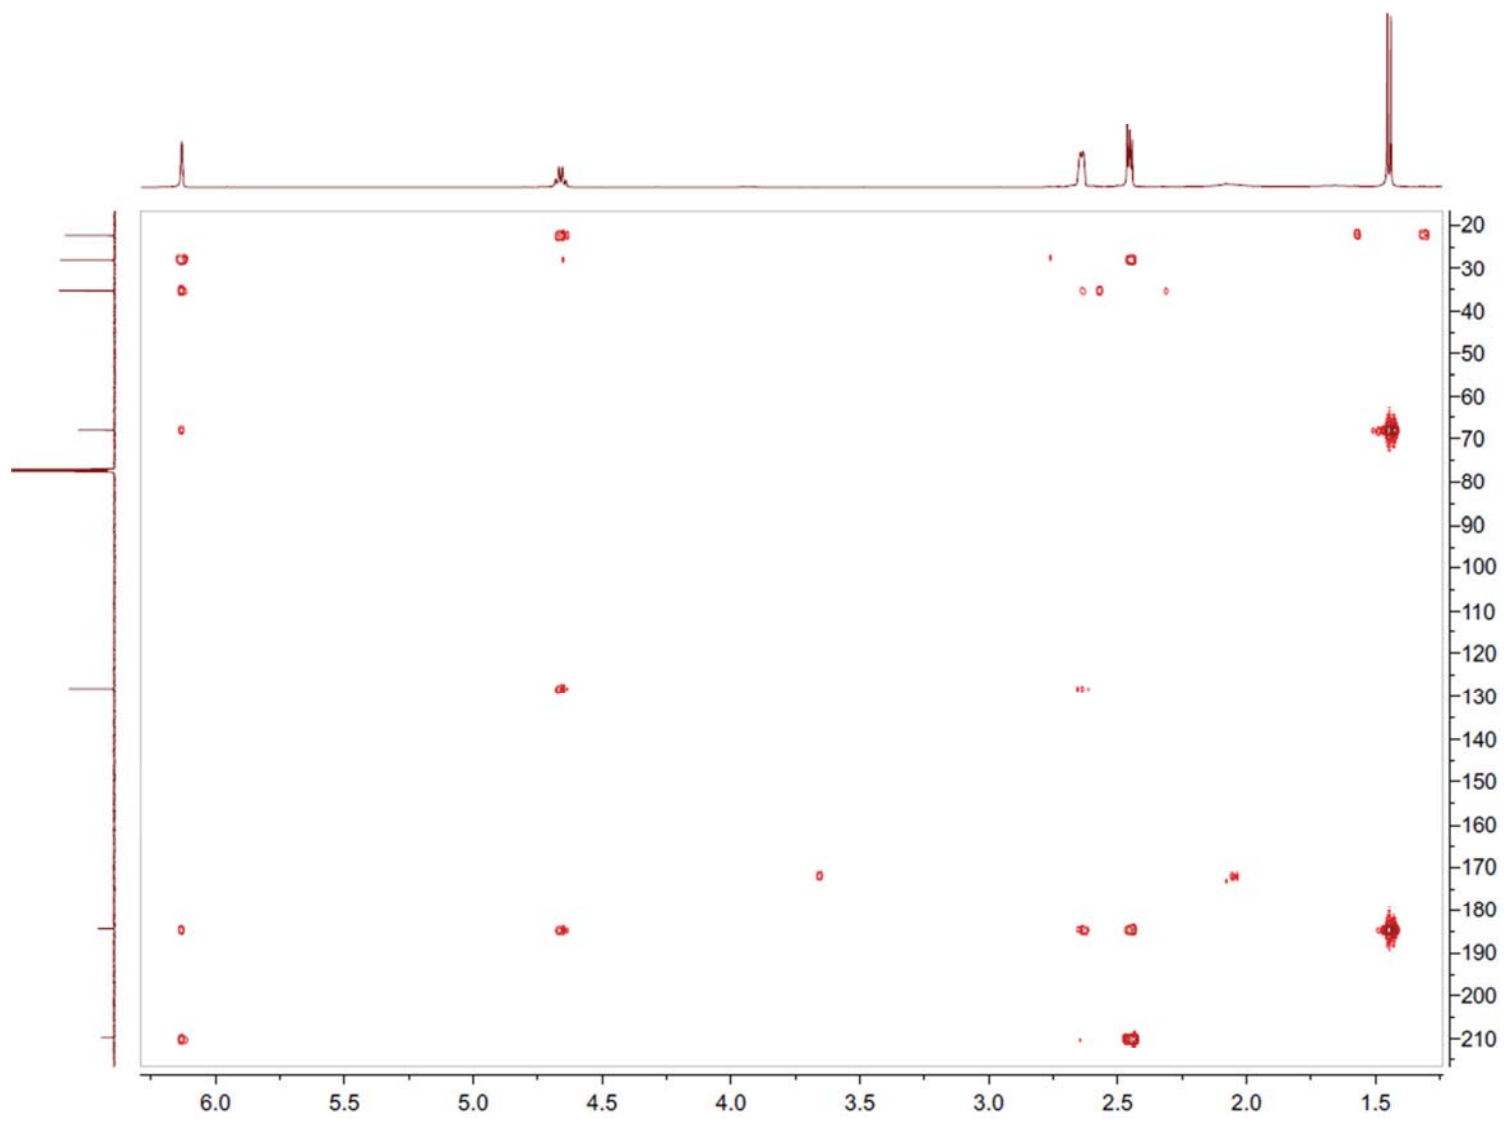

Figure S36. HMBC spectrum of compound 5 in CDCl<sub>3</sub>.

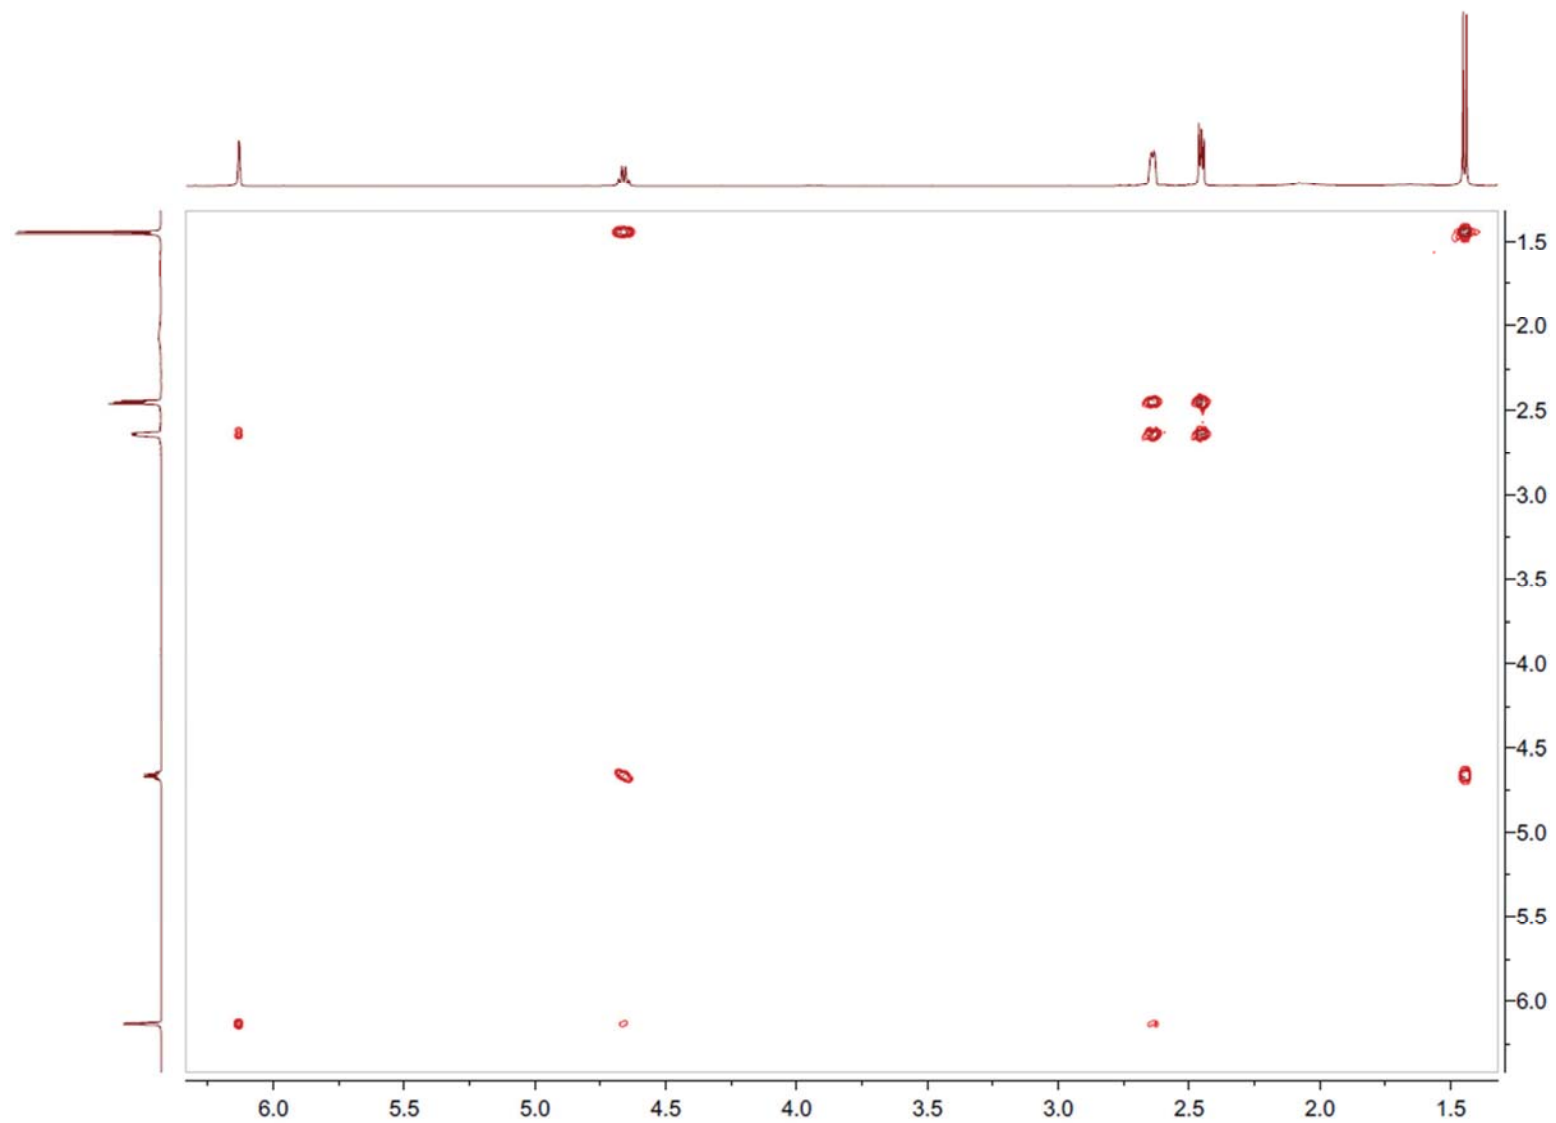

**Figure S37.** COSY spectrum of compound **5** in CDCl<sub>3</sub>.



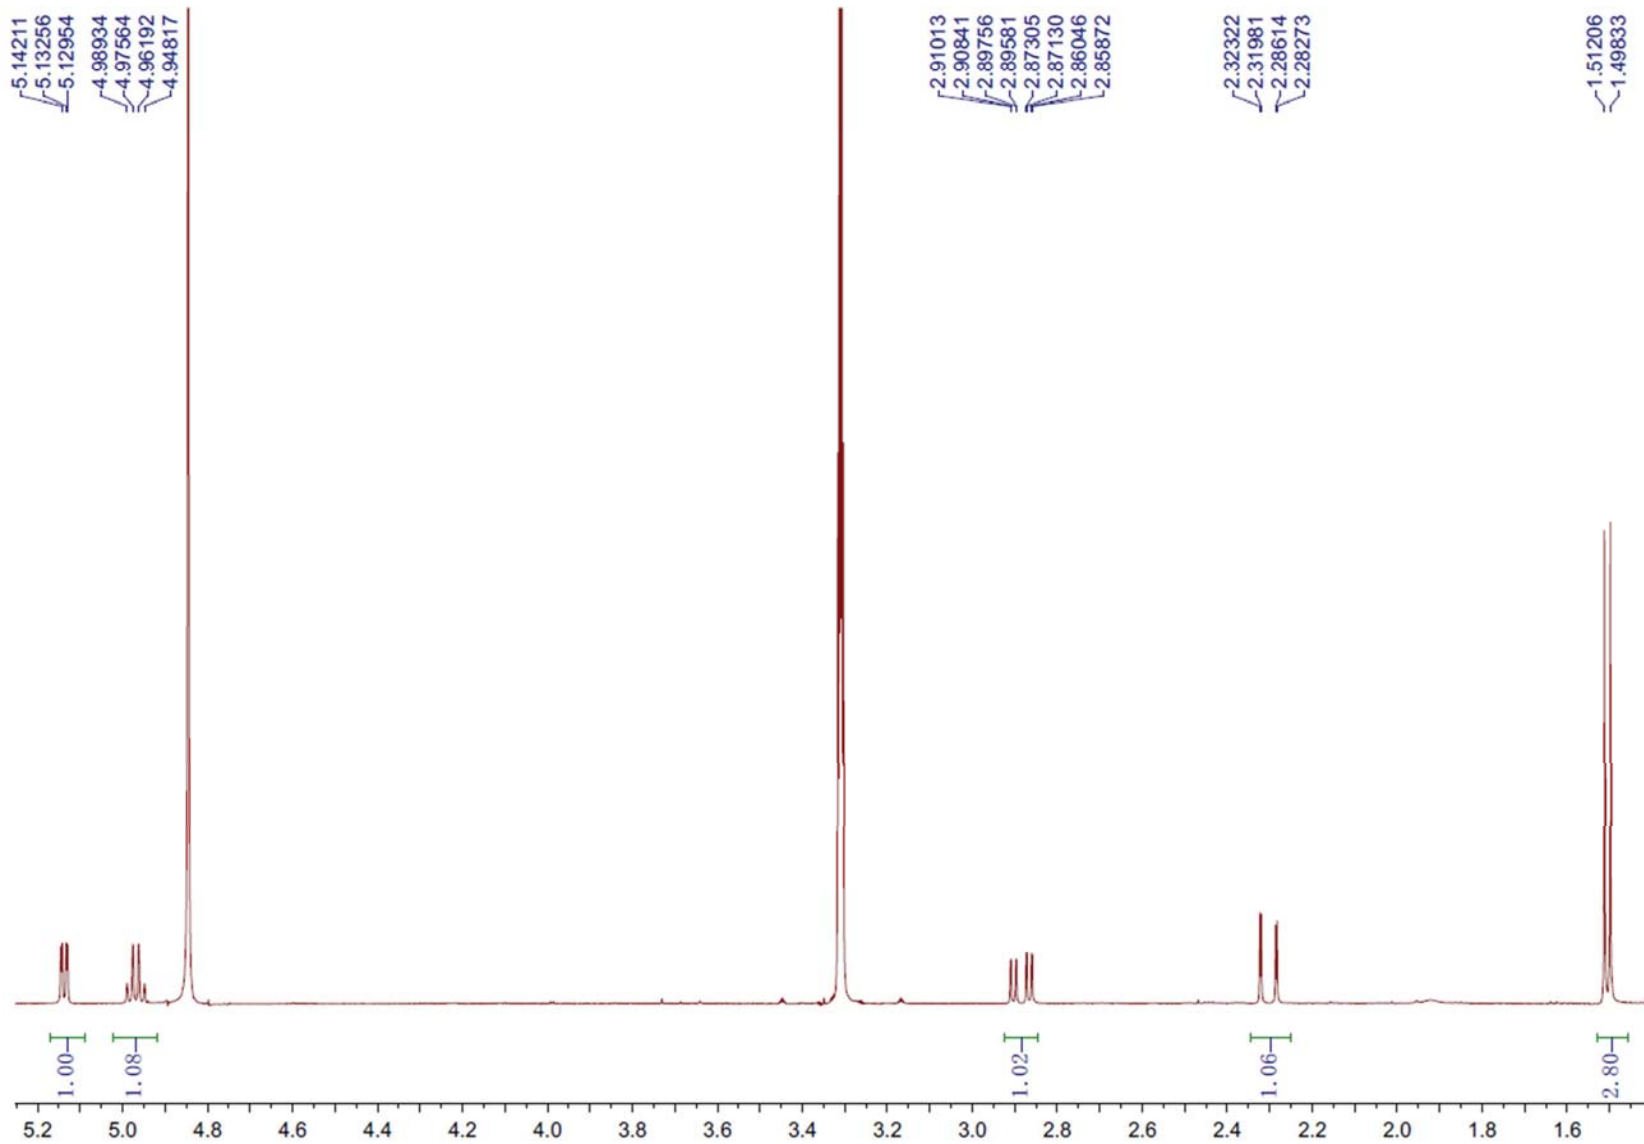

Figure S38.  $^1\text{H}$  NMR spectrum of compound **6** in  $\text{CD}_3\text{OD}$ .

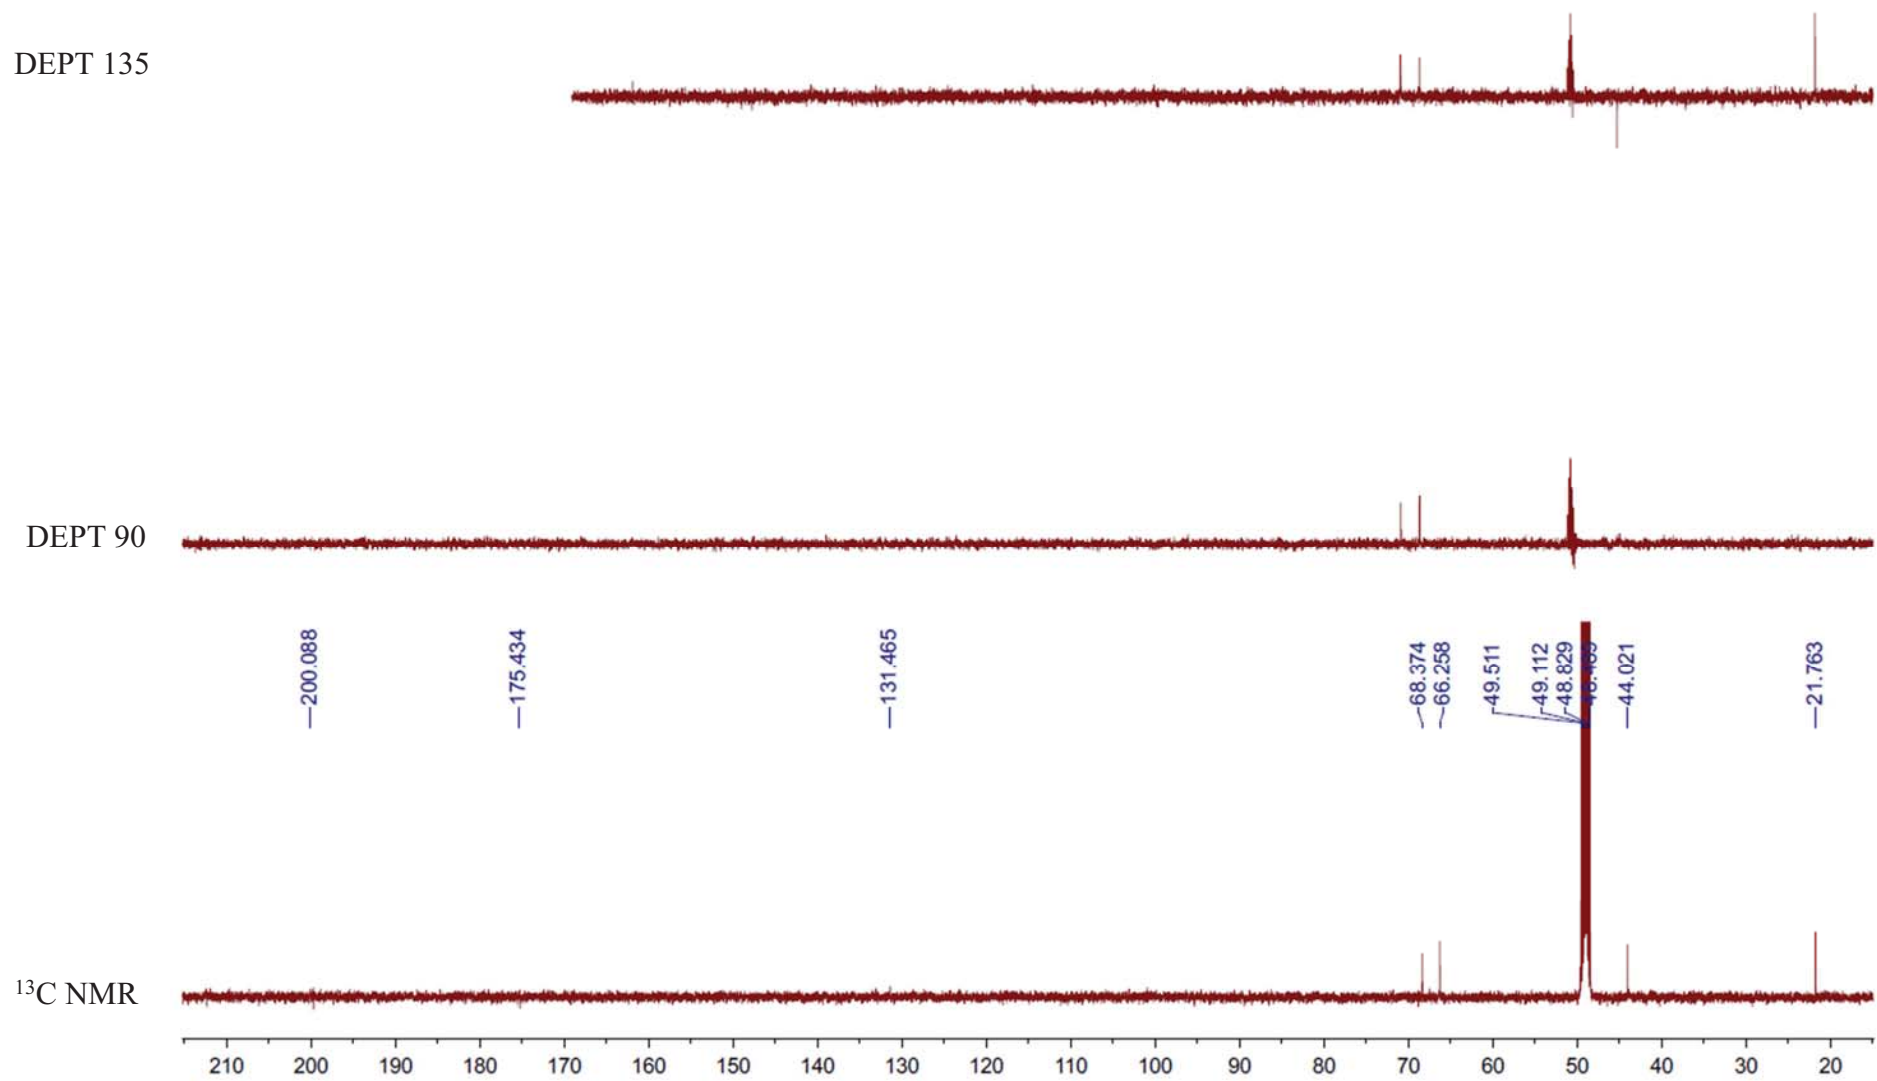

Figure S39.  $^{13}\text{C}$  NMR and DEPT spectra of compound **6** in  $\text{CD}_3\text{OD}$ .

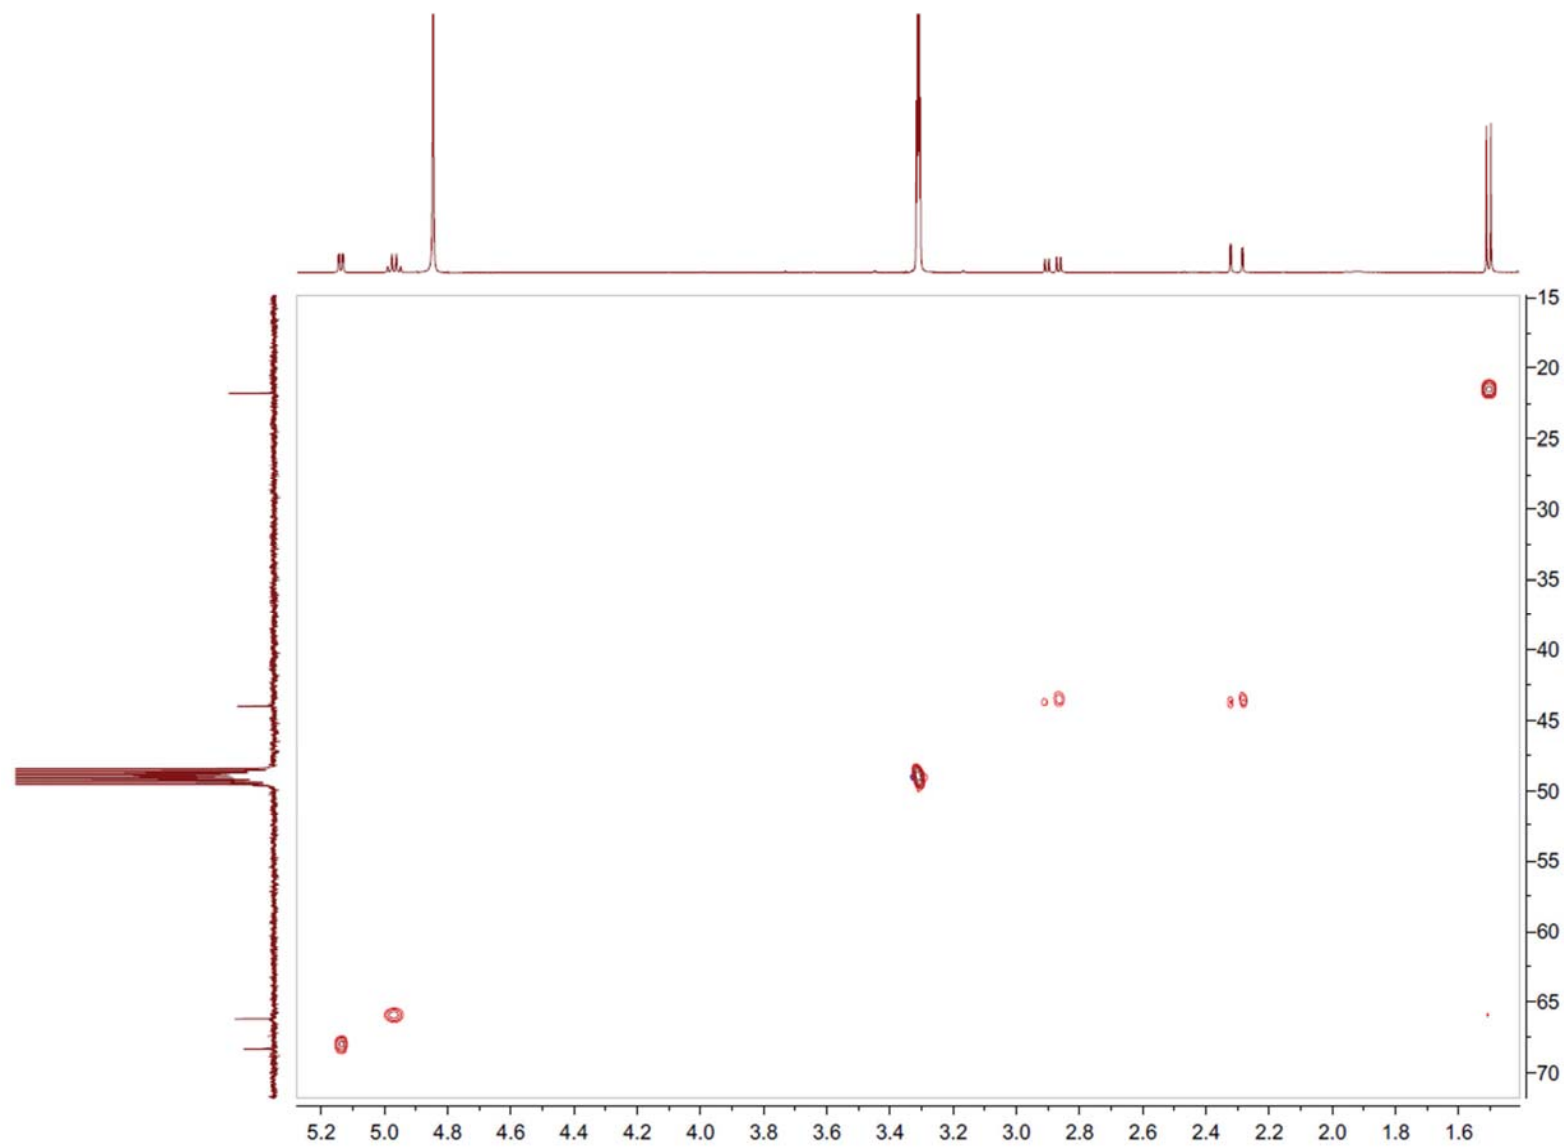

**Figure S40.** HSQC spectrum of compound **6** in CD<sub>3</sub>OD.

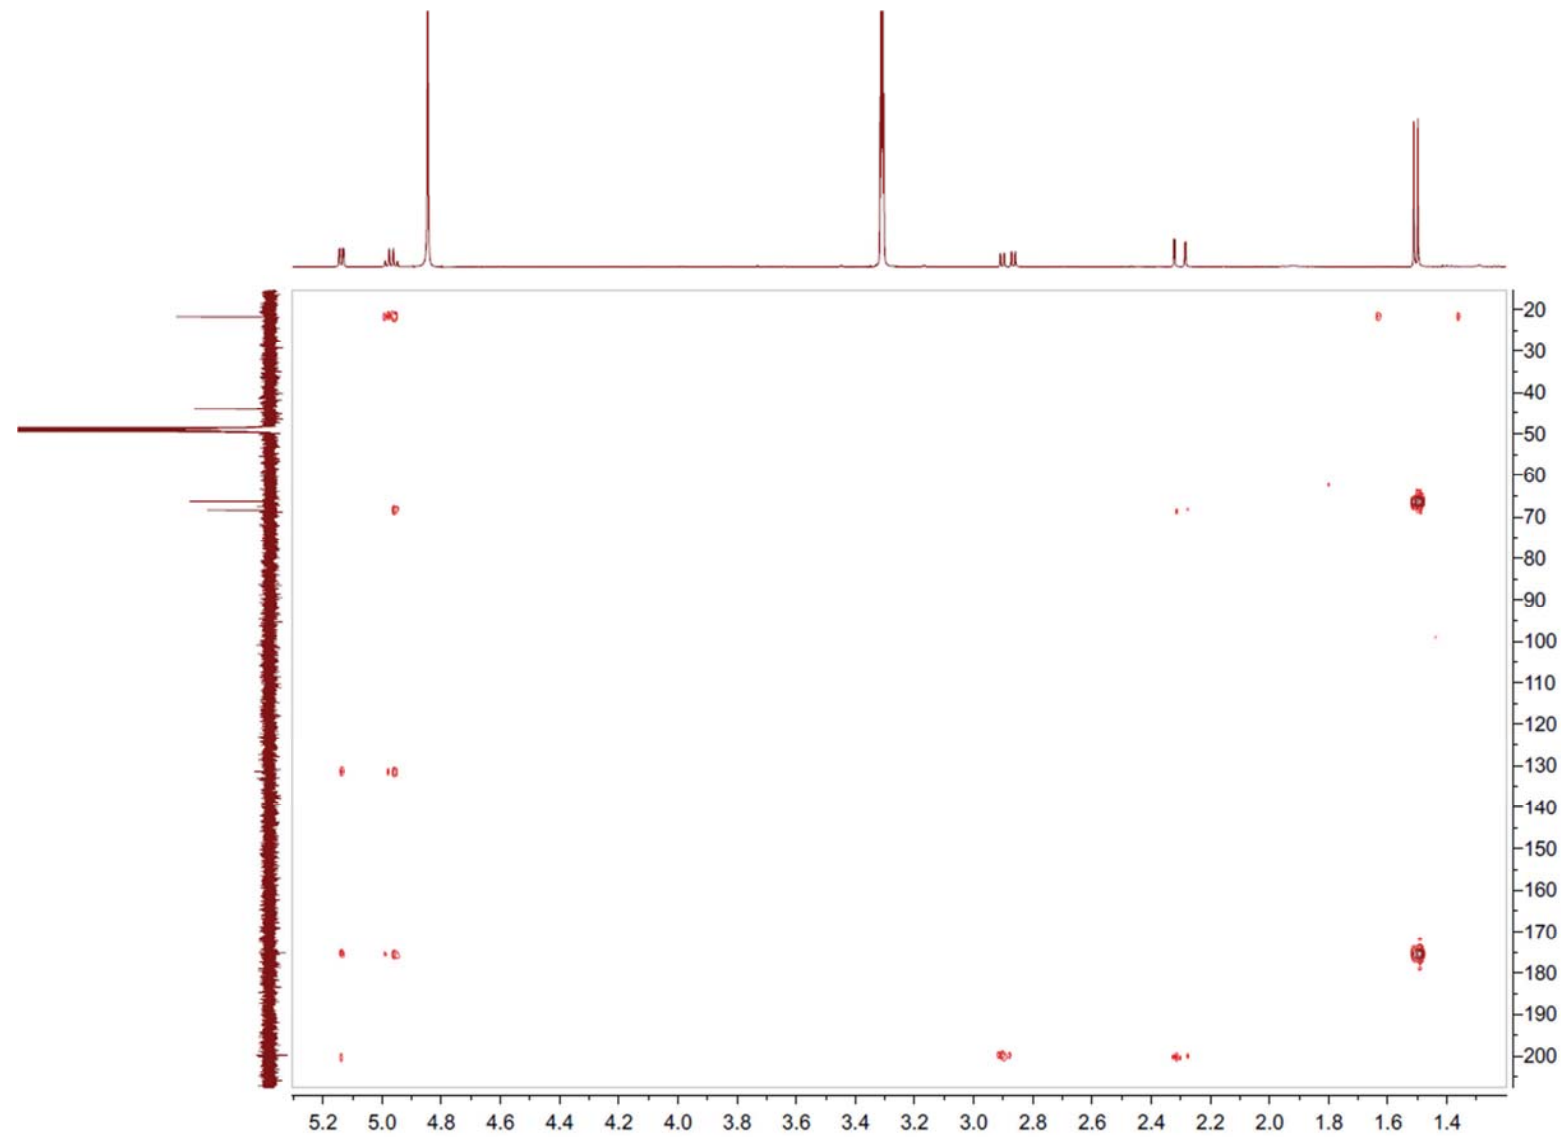

Figure S41. HMBC spectrum of compound 6 in CD<sub>3</sub>OD.

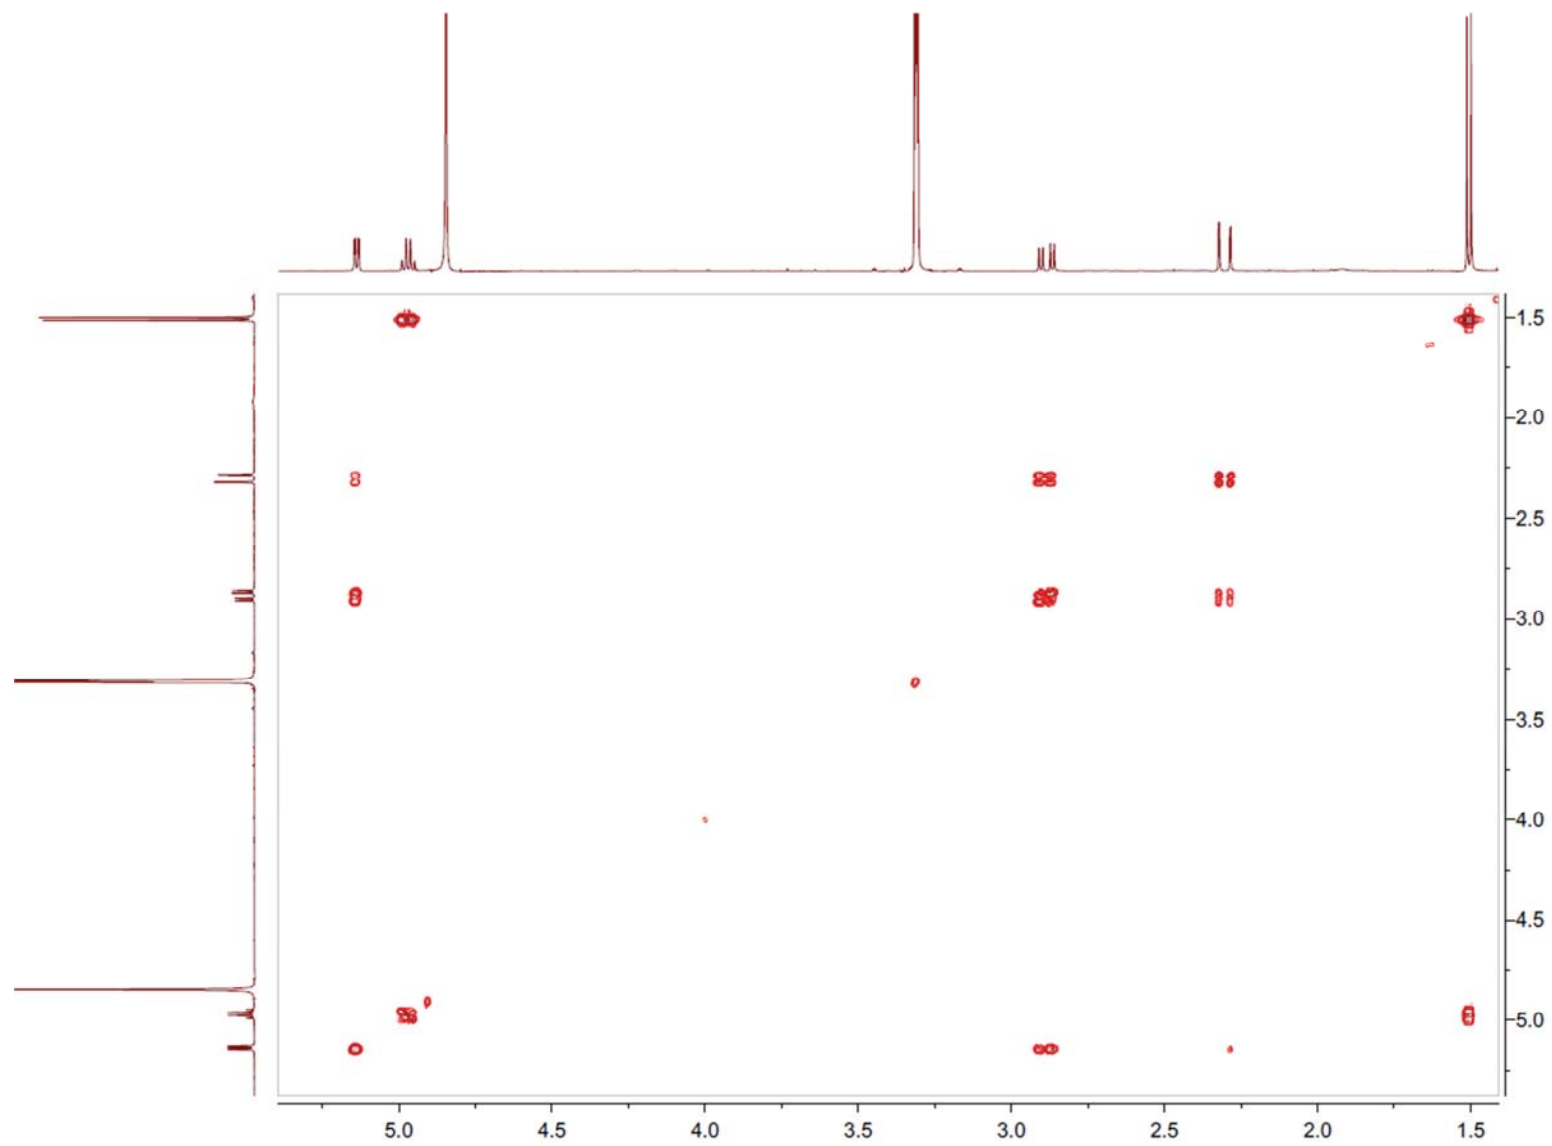

Figure S42. COSY spectrum of compound 6 in CD<sub>3</sub>OD.

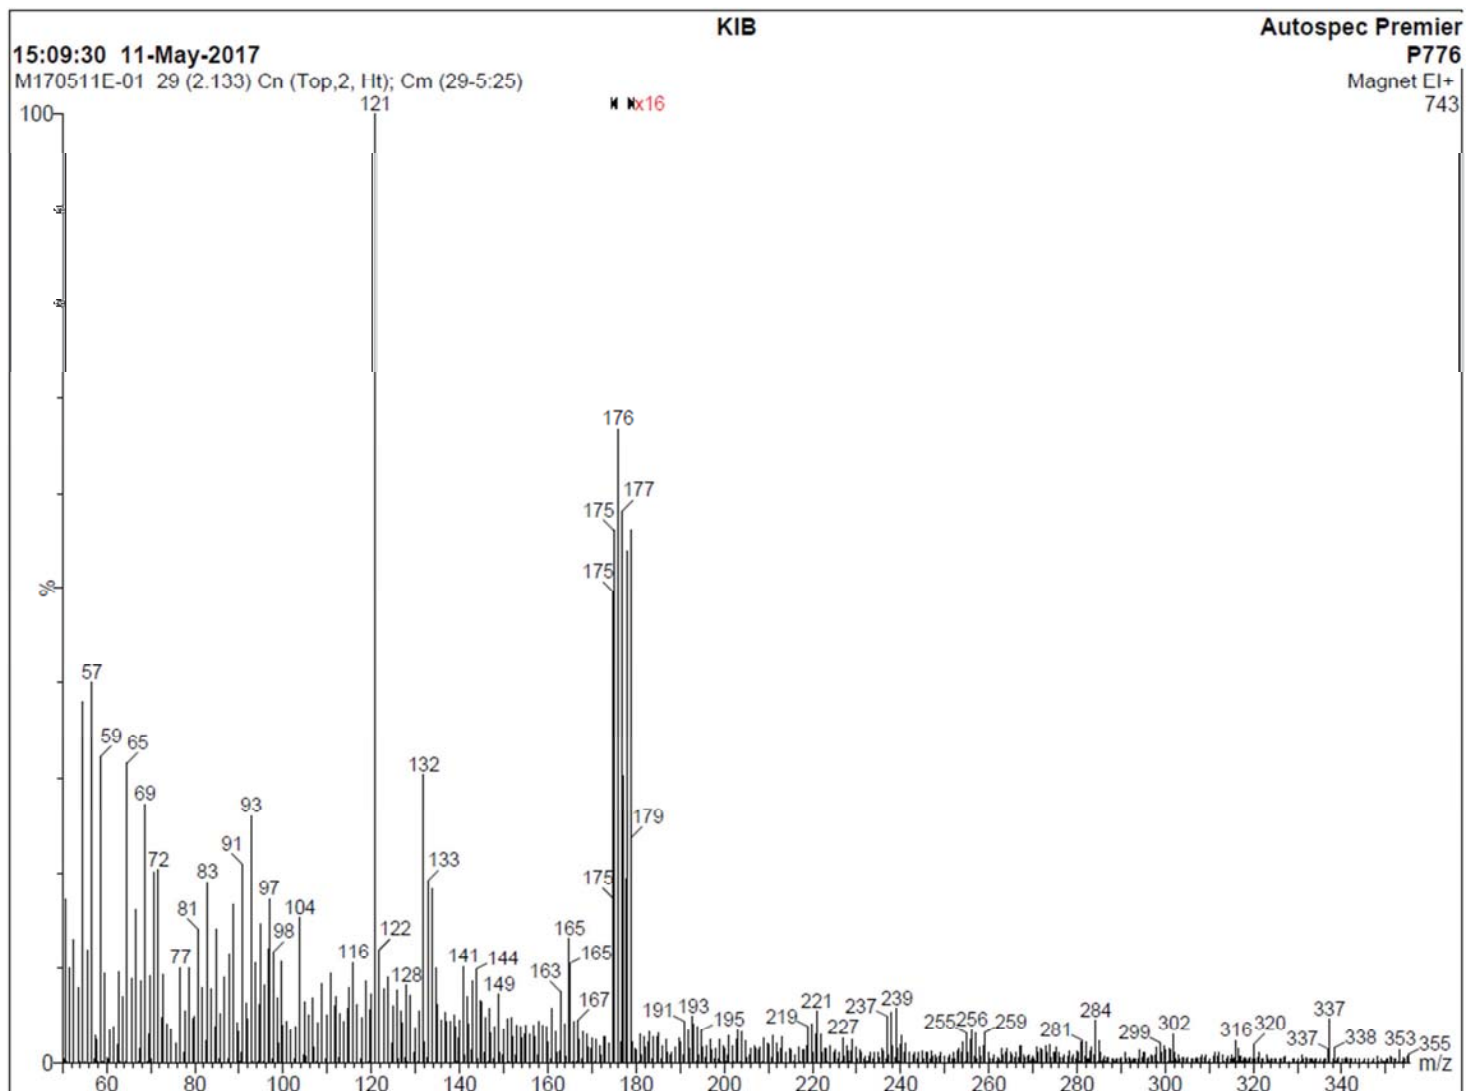

Figure S43. EIMS spectrum of compound 6.

### Single Mass Analysis

Tolerance = 10.0 PPM / DBE: min = -10.0, max = 120.0

Selected filters: None

Monoisotopic Mass, Odd and Even Electron Ions

10 formula(e) evaluated with 1 results within limits (up to 51 closest results for each mass)

Elements Used:

C: 0-200 H: 0-400 O: 2-4 Cl: 1-1

16:48:13 11-May-2017

Voltage EI+

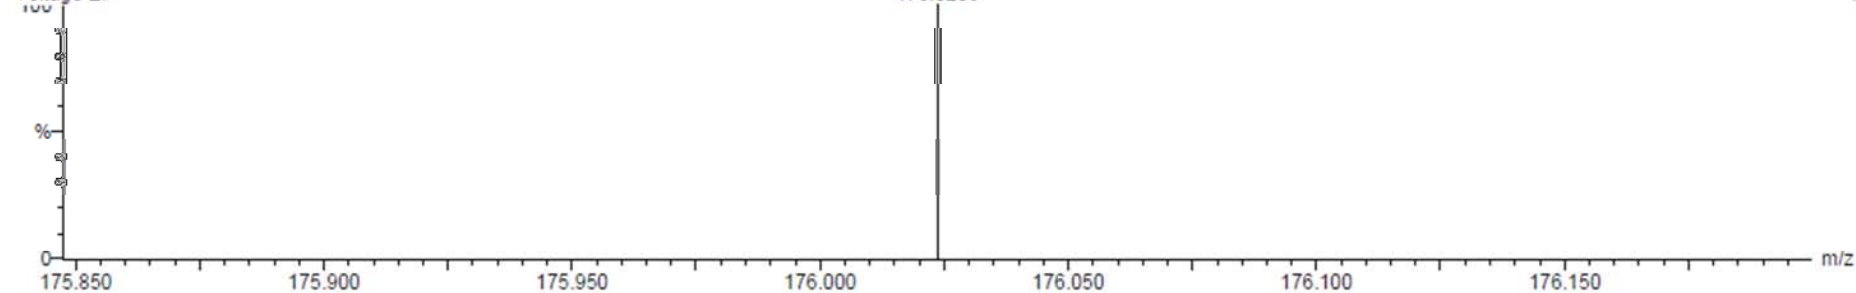

Minimum: -10.0  
Maximum: 200.0 10.0 120.0

| Mass     | Calc. Mass | mDa  | PPM  | DBE | i-FIT     | Formula     |
|----------|------------|------|------|-----|-----------|-------------|
| 176.0236 | 176.0240   | -0.4 | -2.3 | 3.0 | 5546026.0 | C7 H9 O3 Cl |

Figure S44. HREIMS spectrum of compound 6.

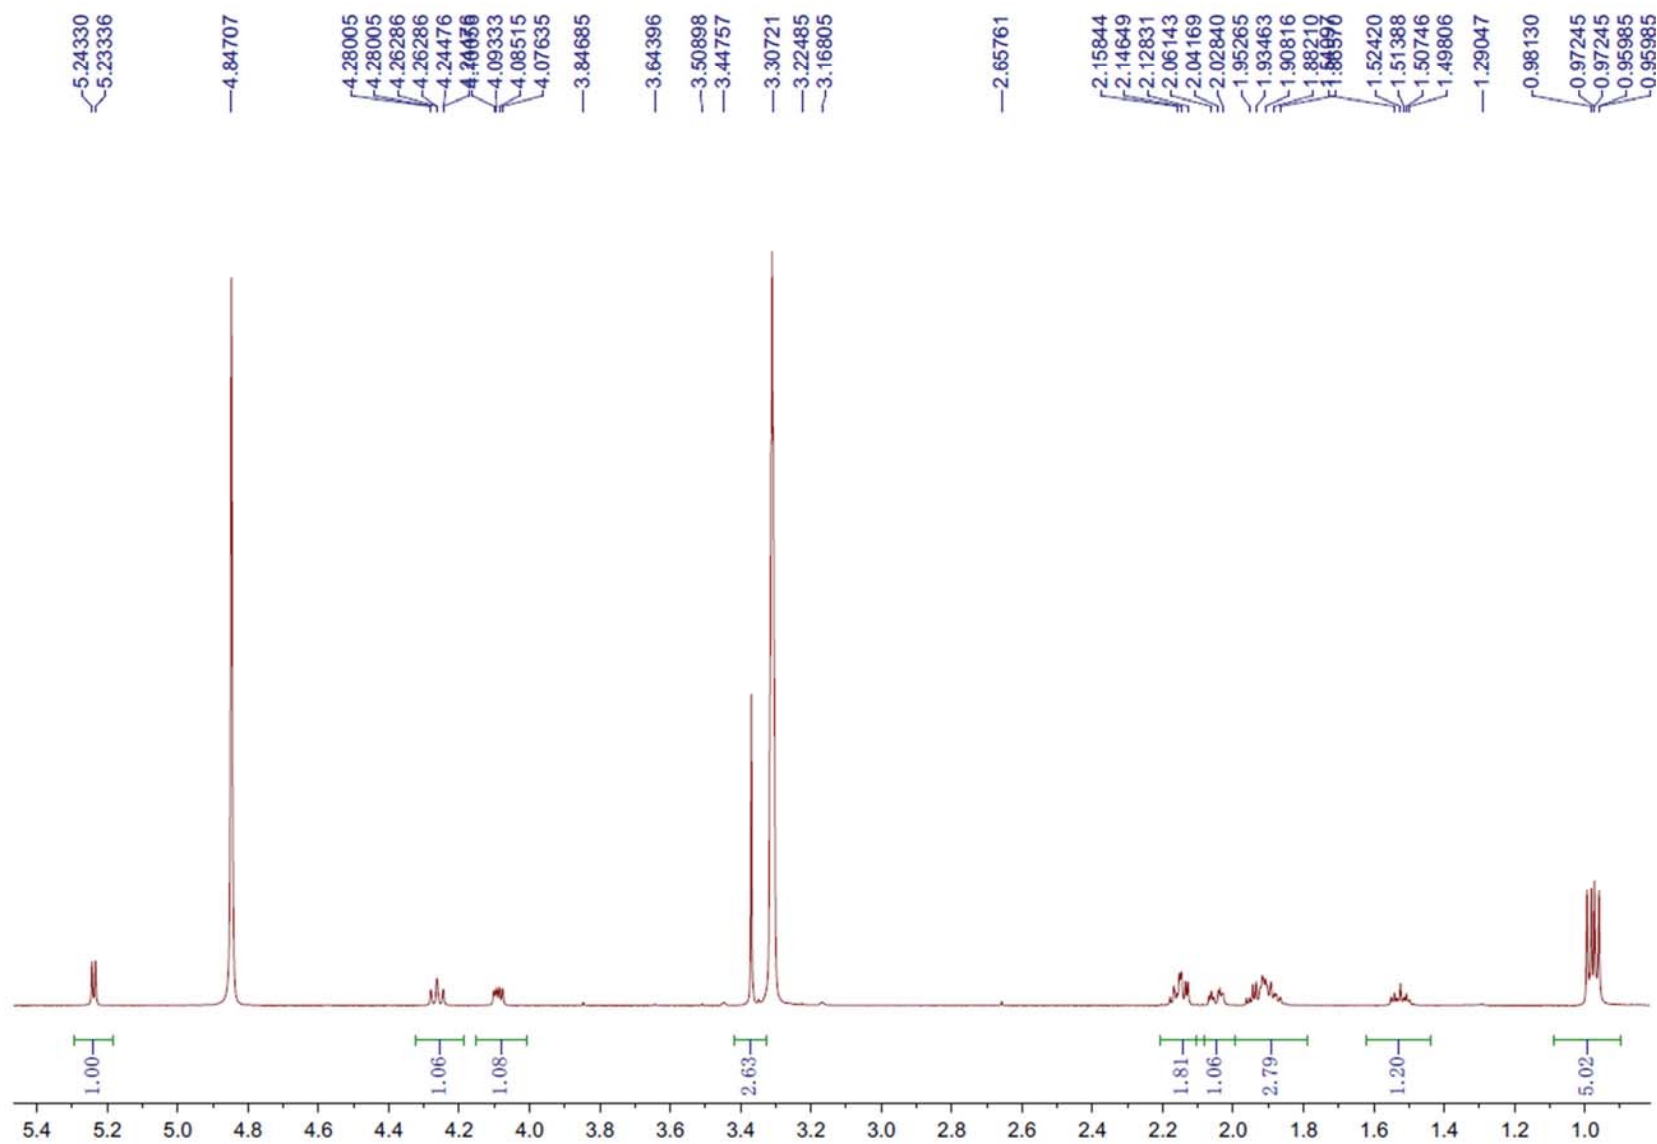

Figure S45.  $^1\text{H}$  NMR spectrum of compound **7** in  $\text{CD}_3\text{OD}$ .



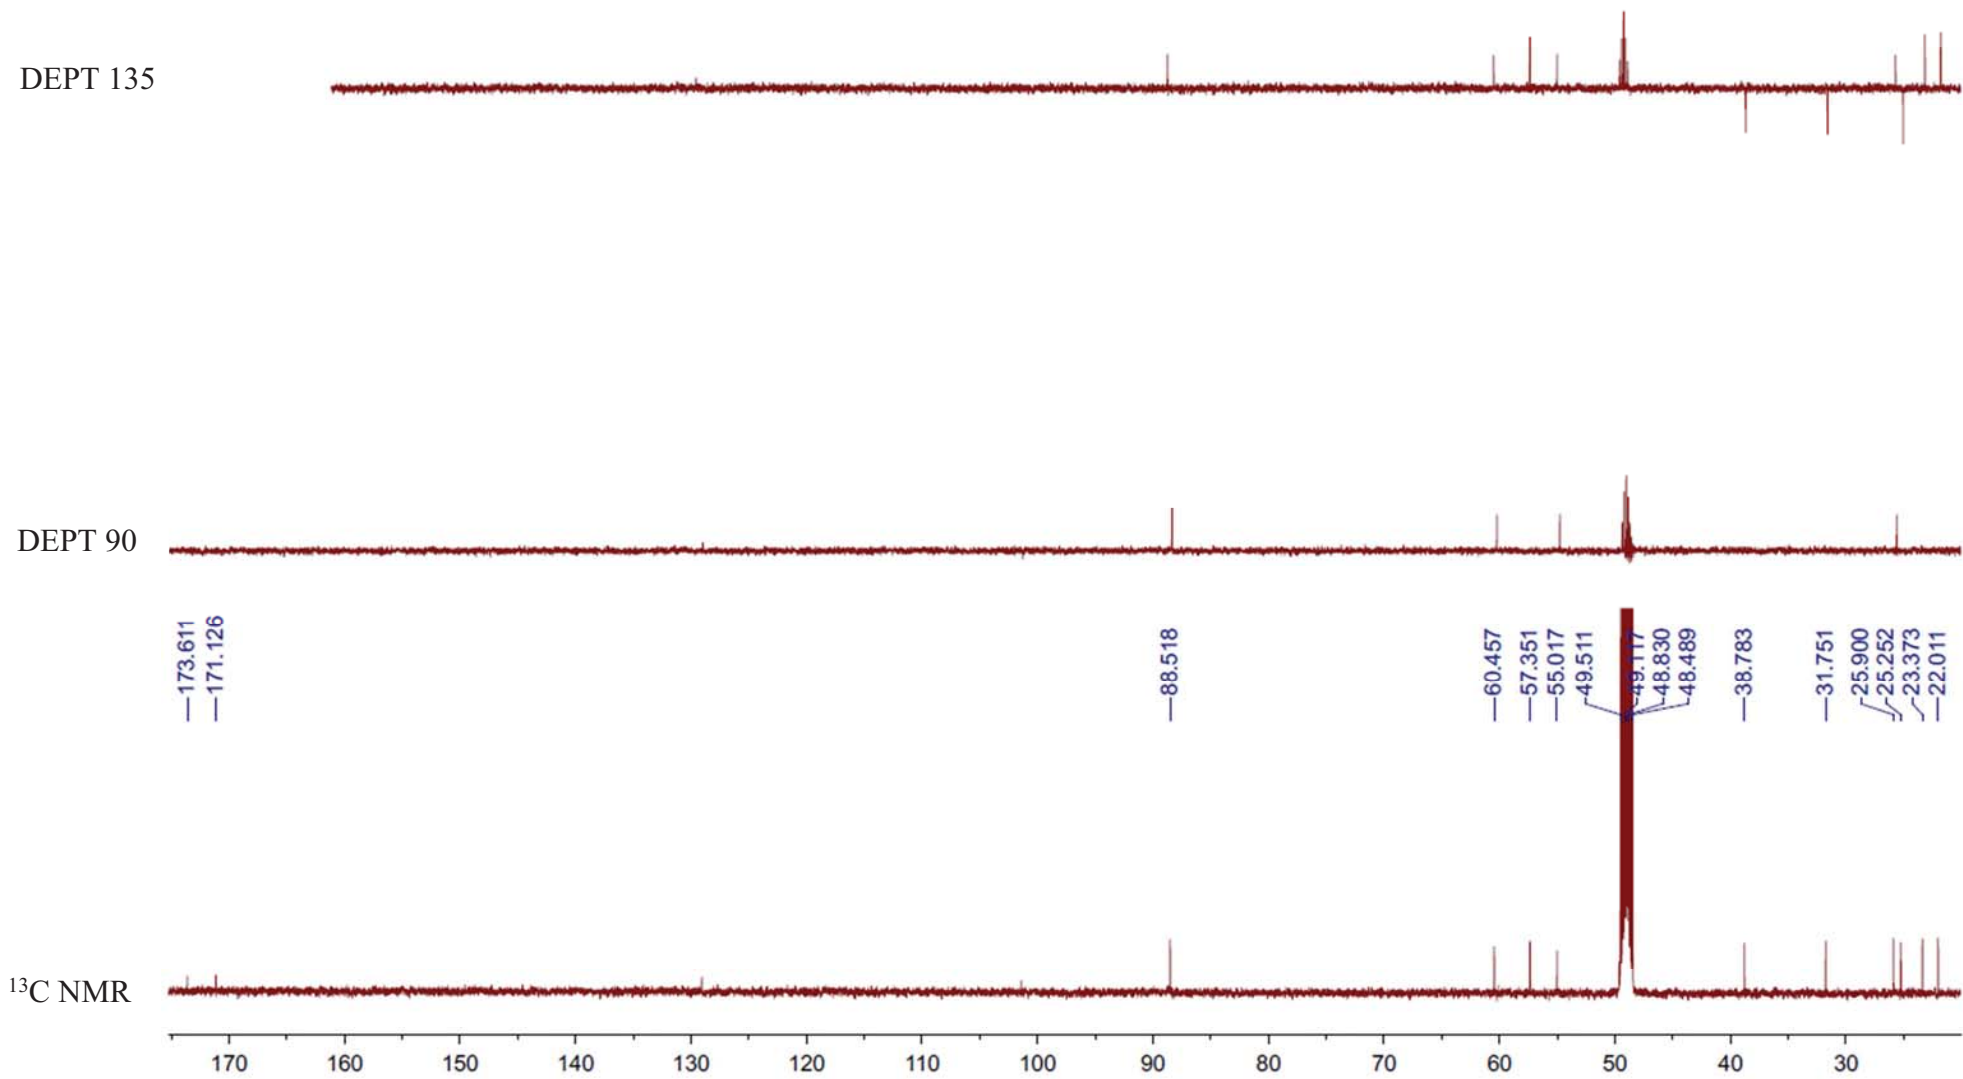

Figure S46.  $^{13}\text{C}$  NMR and DEPT spectra of compound 7 in  $\text{CD}_3\text{OD}$ .

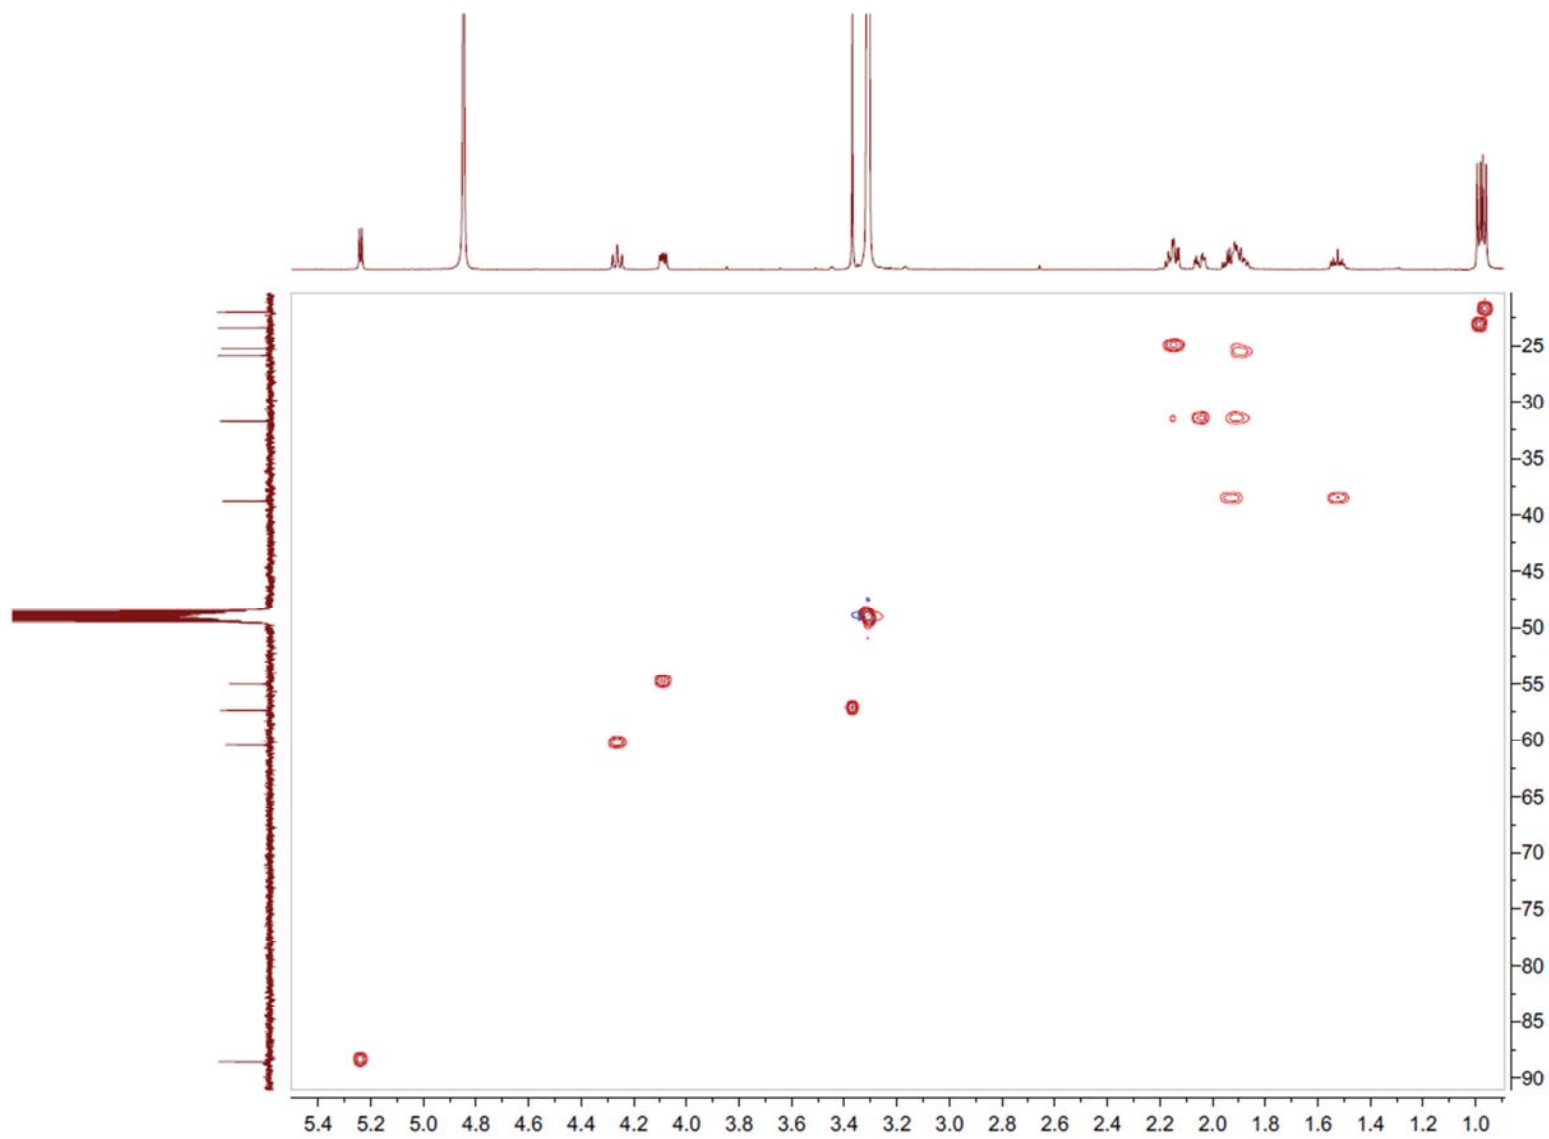

Figure S47. HSQC spectrum of compound 7 in CD<sub>3</sub>OD.

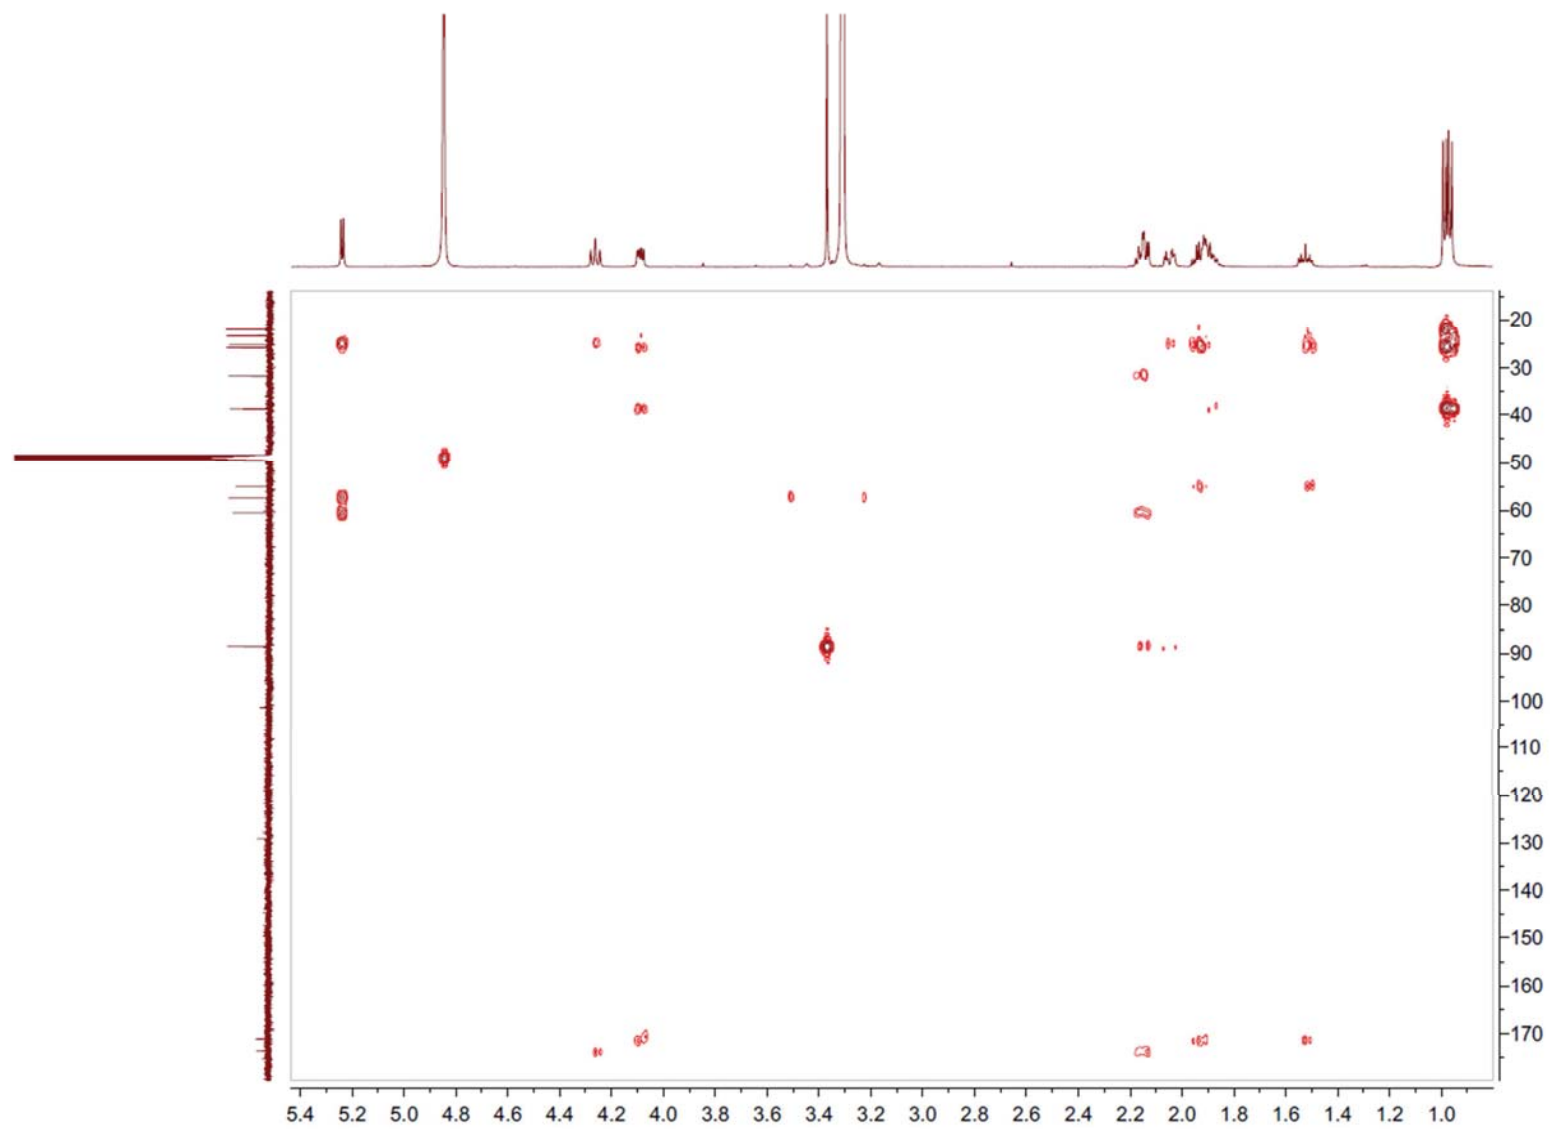

Figure S48. HMBC spectrum of compound 7 in CD<sub>3</sub>OD.

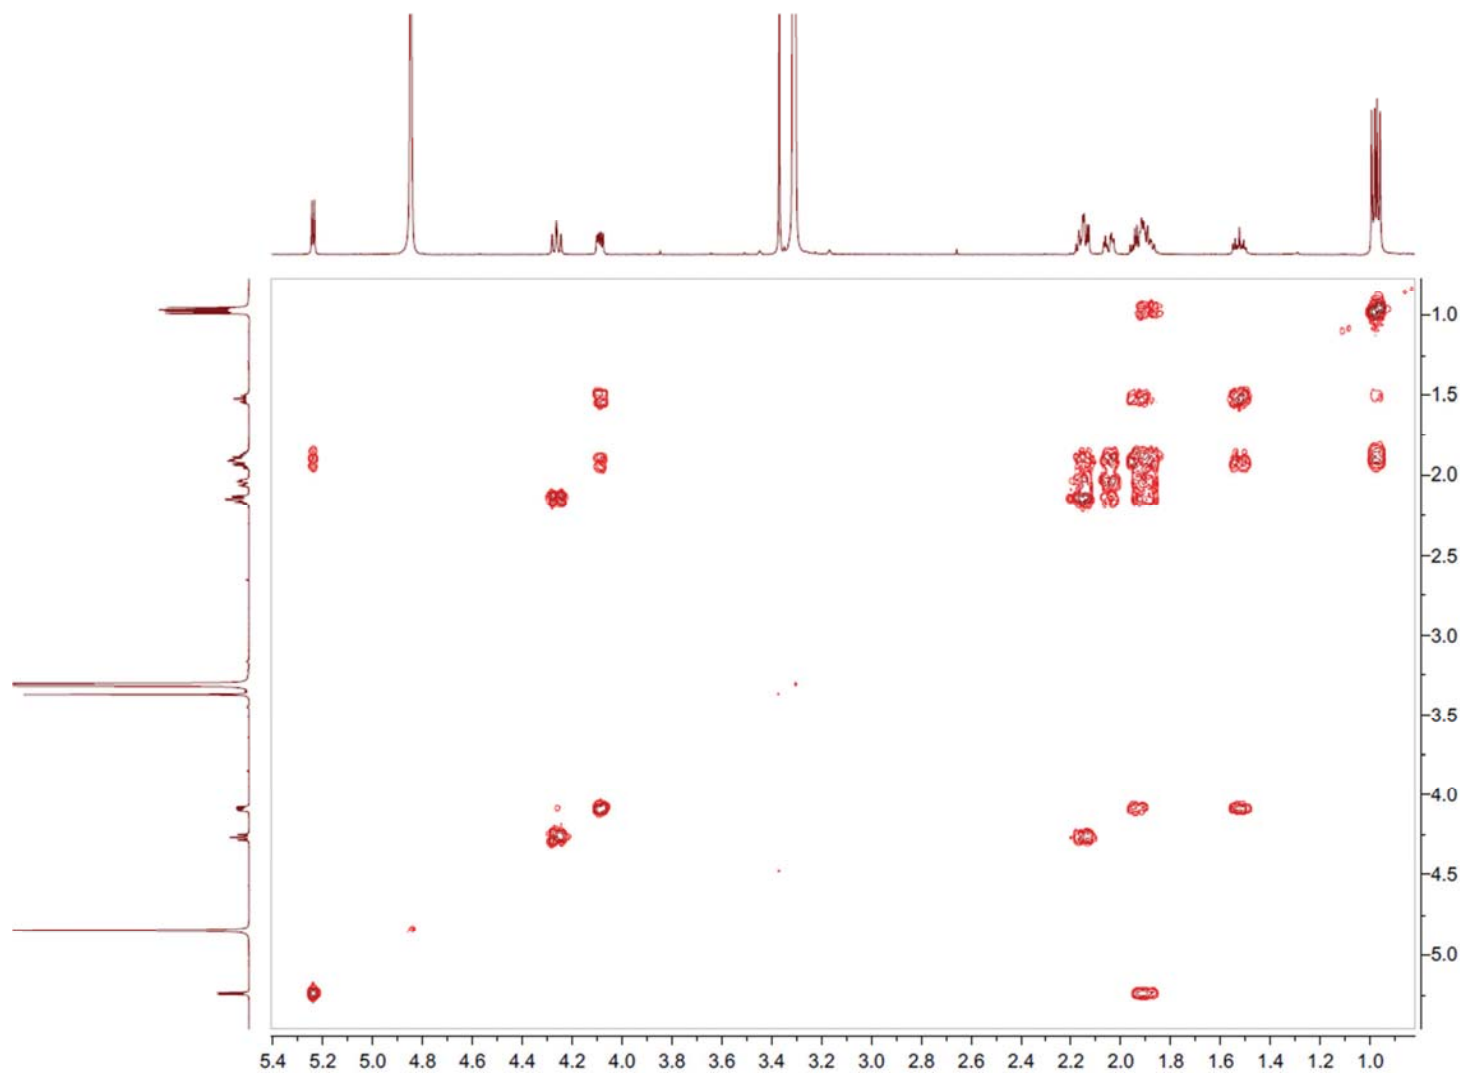

**Figure S49.** COSY spectrum of compound **7** in  $\text{CD}_3\text{OD}$ .

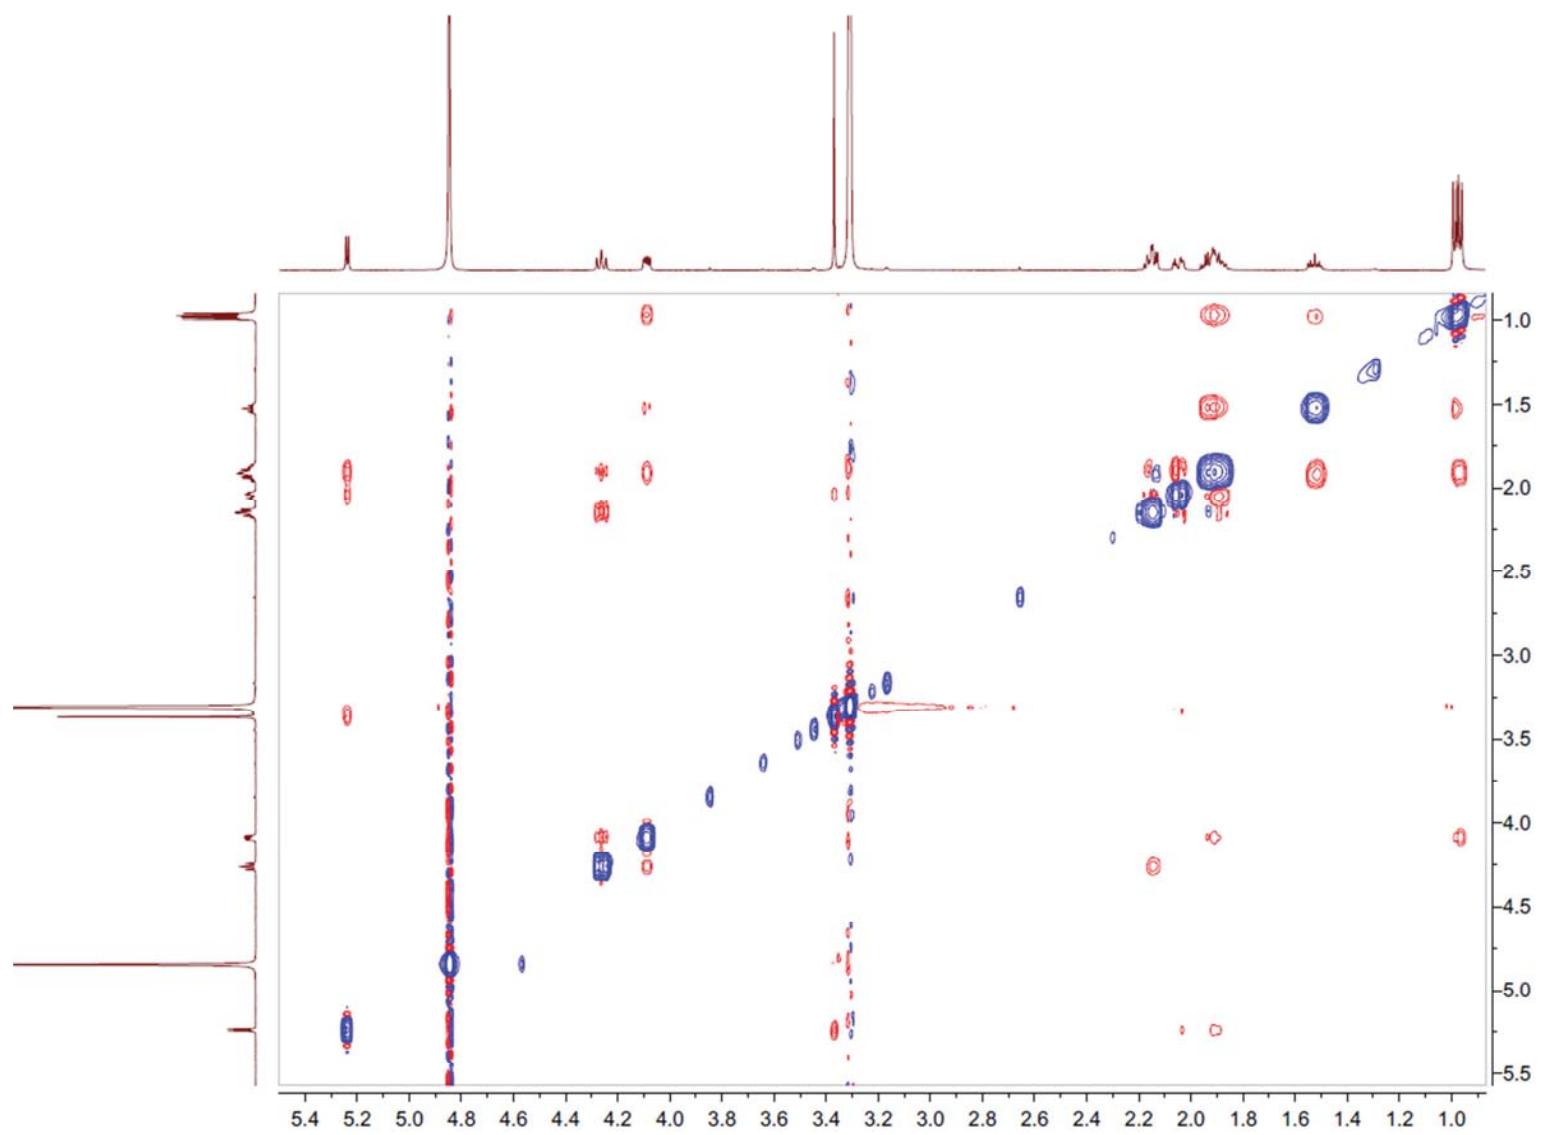

**Figure S50.** NOESY spectrum of compound **7** in CD<sub>3</sub>OD.

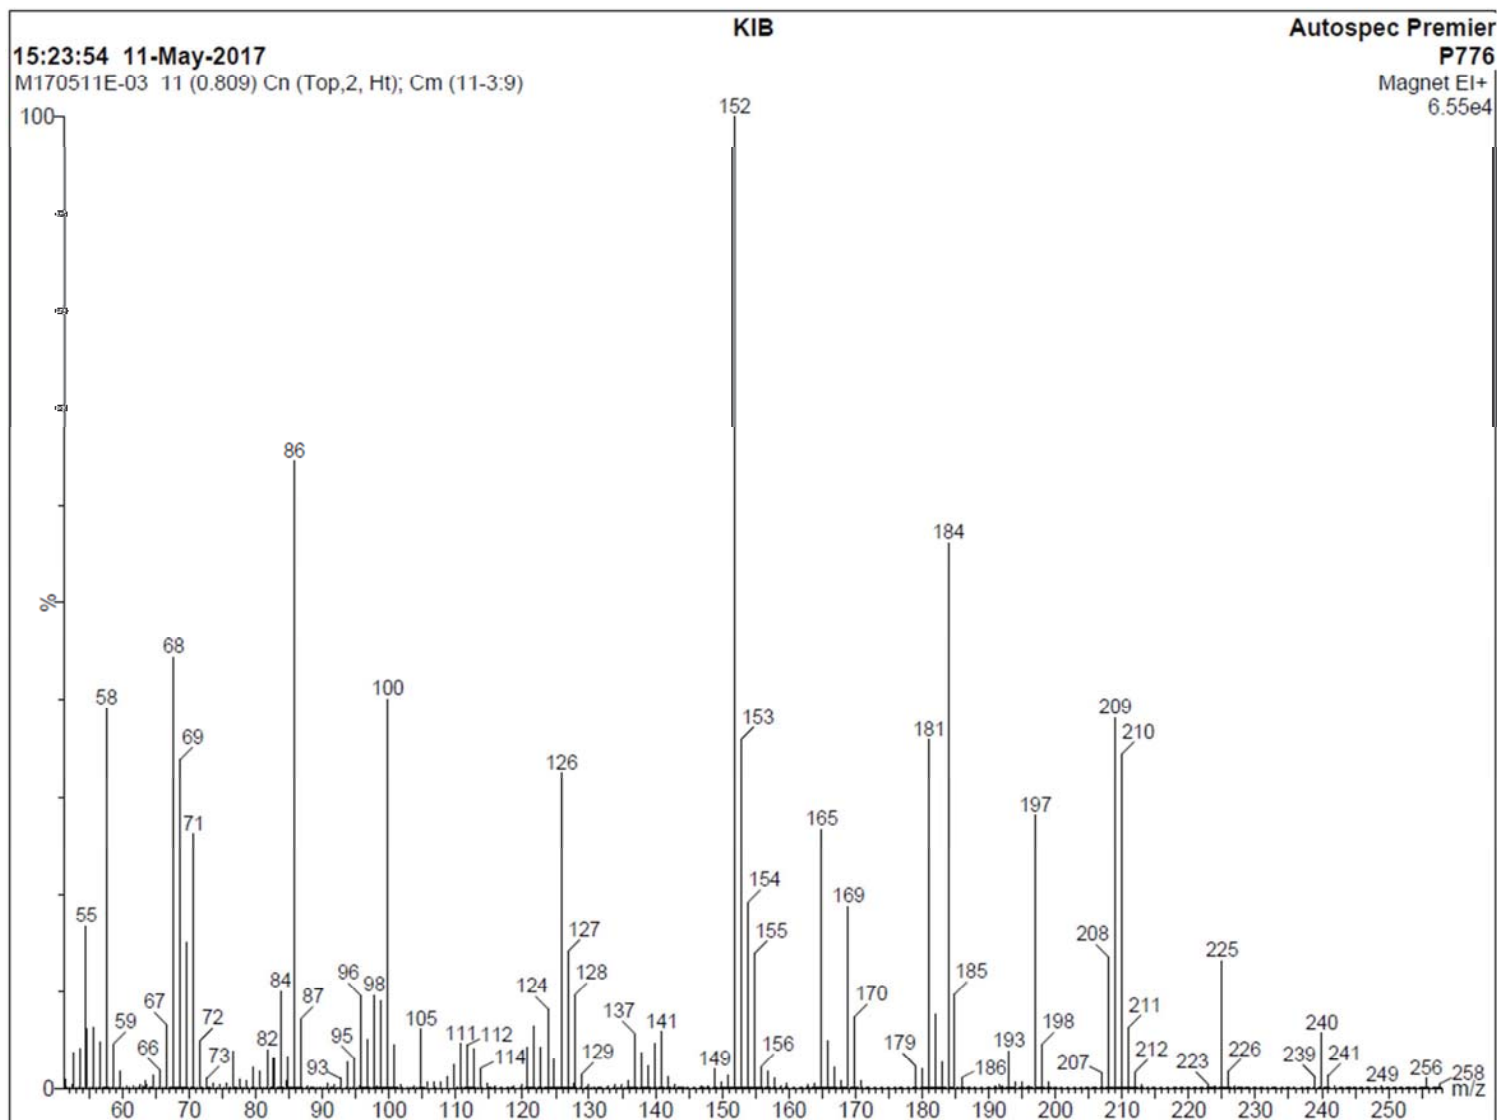

Figure S51. EIMS spectrum of compound 7.

### Single Mass Analysis

Tolerance = 10.0 PPM / DBE: min = -10.0, max = 120.0

Selected filters: None

Monoisotopic Mass, Odd and Even Electron Ions

13 formula(e) evaluated with 1 results within limits (up to 51 closest results for each mass)

Elements Used:

C: 0-200 H: 0-400 N: 2-2 O: 2-4

17:19:27 11-May-2017

Voltage EI+

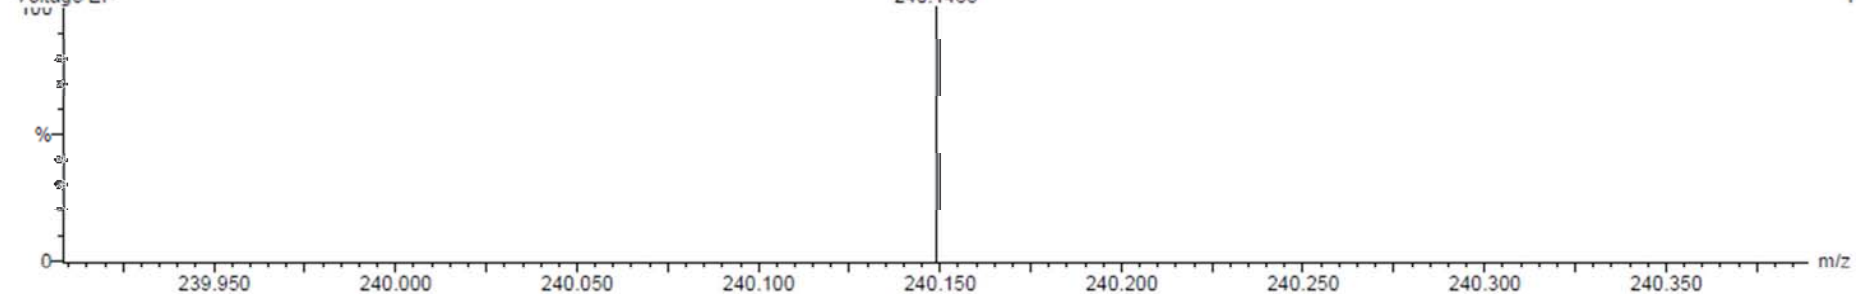

|          |            |      |     |       |           |               |
|----------|------------|------|-----|-------|-----------|---------------|
| Minimum: |            |      |     | -10.0 |           |               |
| Maximum: | 200.0      | 10.0 |     | 120.0 |           |               |
| Mass     | Calc. Mass | mDa  | PPM | DBE   | i-FIT     | Formula       |
| 240.1488 | 240.1474   | 1.4  | 5.8 | 4.0   | 5546026.0 | C12 H20 N2 O3 |

Figure S52. HREIMS spectrum of compound 7.

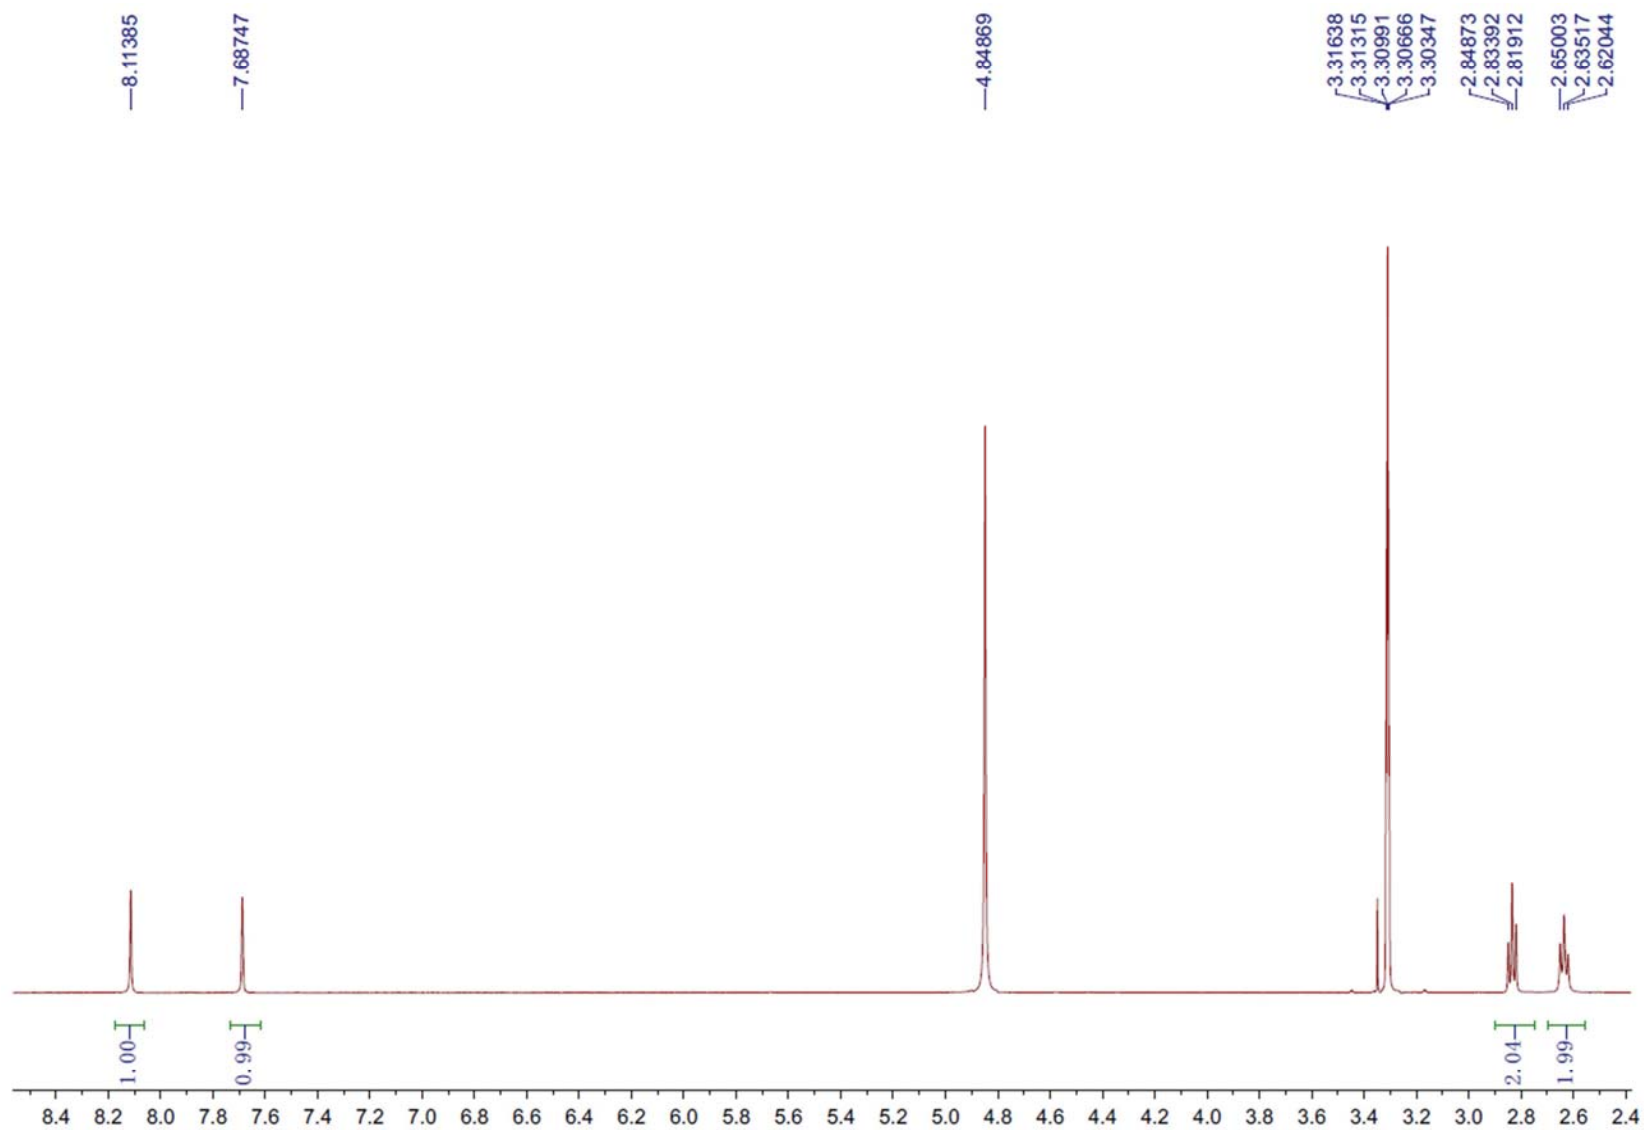

Figure S53.  $^1\text{H}$  NMR spectrum of compound **8** in  $\text{CD}_3\text{OD}$ .



DEPT 135

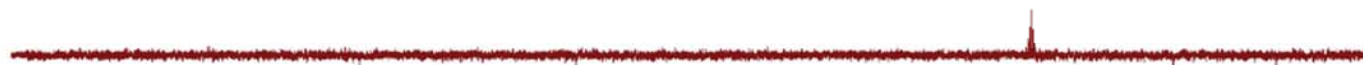

DEPT 90

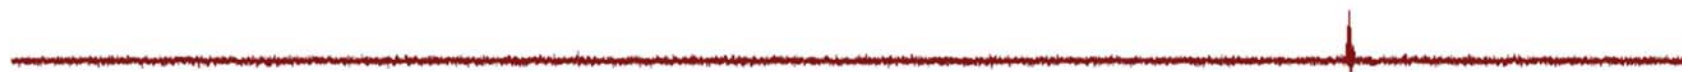

—176.154

—153.360

—140.094

—136.541

49.511

49.455

49.341

49.284

49.170

49.000

48.830

48.660

48.489

—33.673

—22.357

$^{13}\text{C}$  NMR

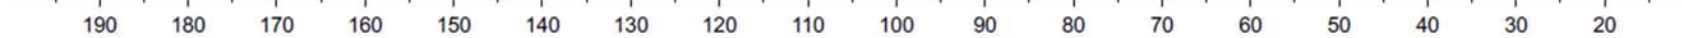

Figure S54.  $^{13}\text{C}$  NMR and DEPT spectra of compound **8** in  $\text{CD}_3\text{OD}$ .

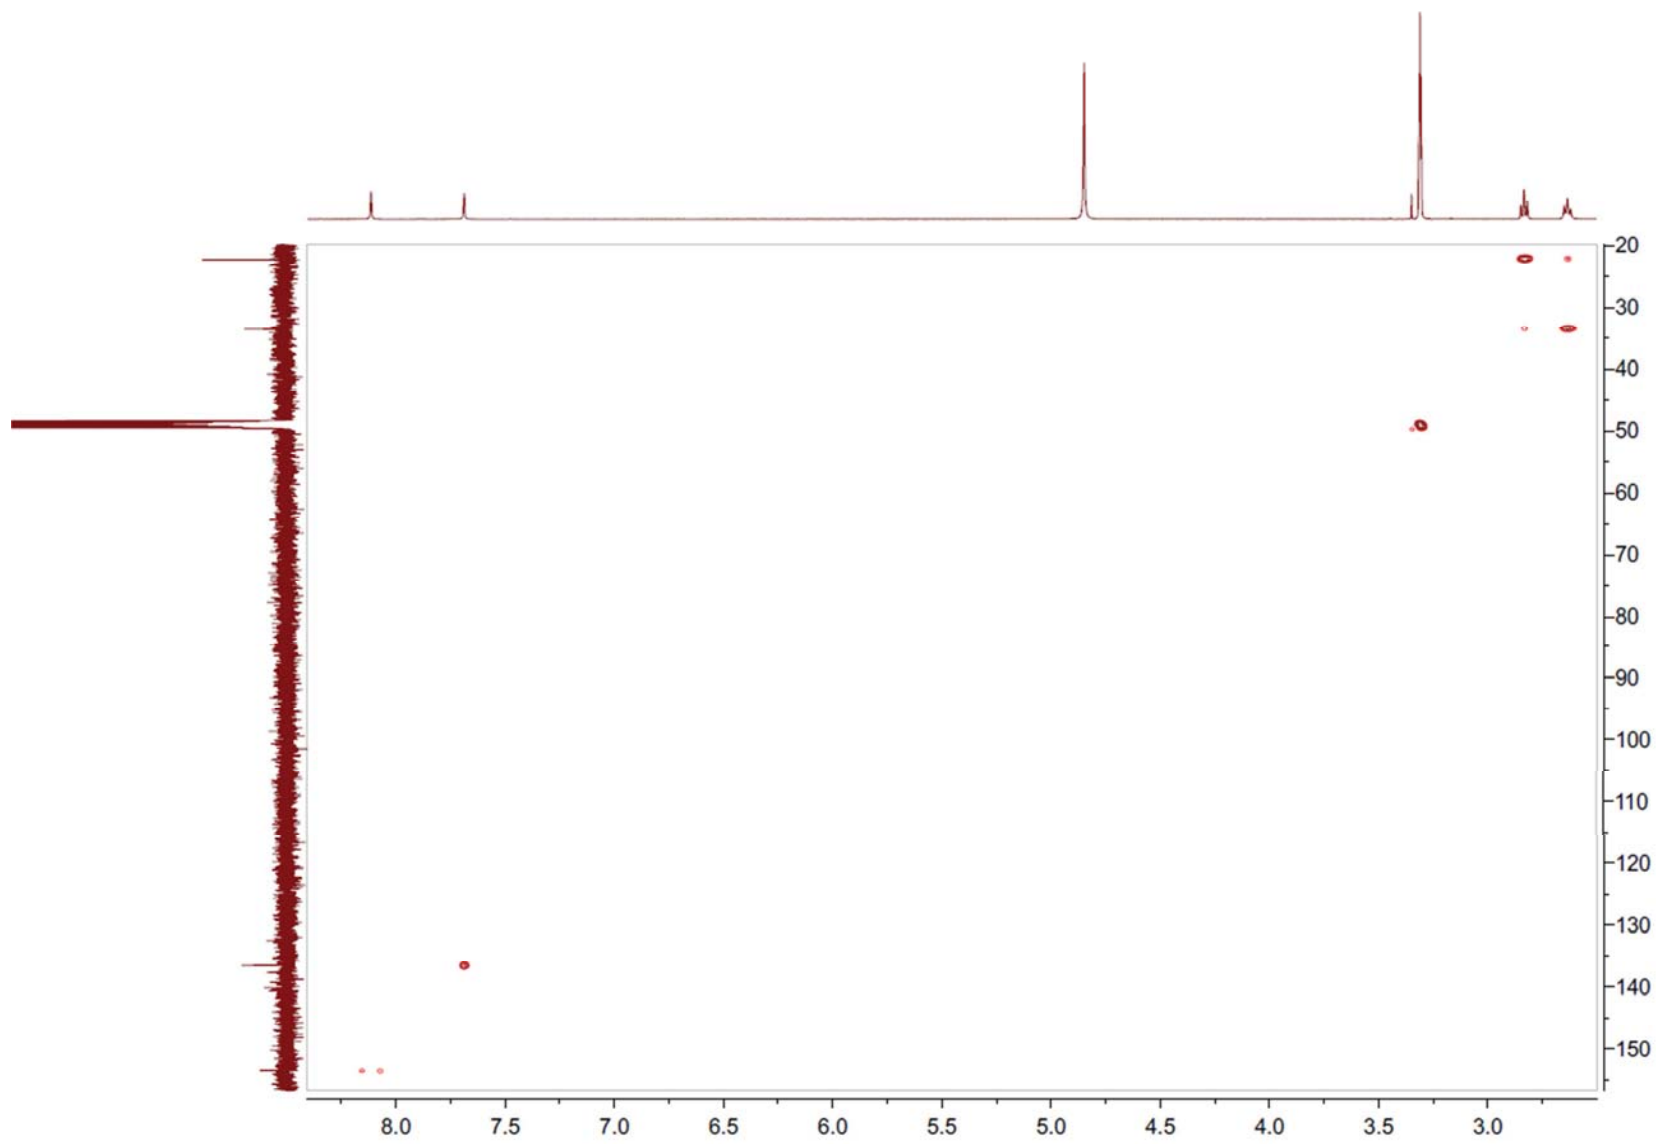

Figure S55. HSQC spectrum of compound **8** in CD<sub>3</sub>OD.

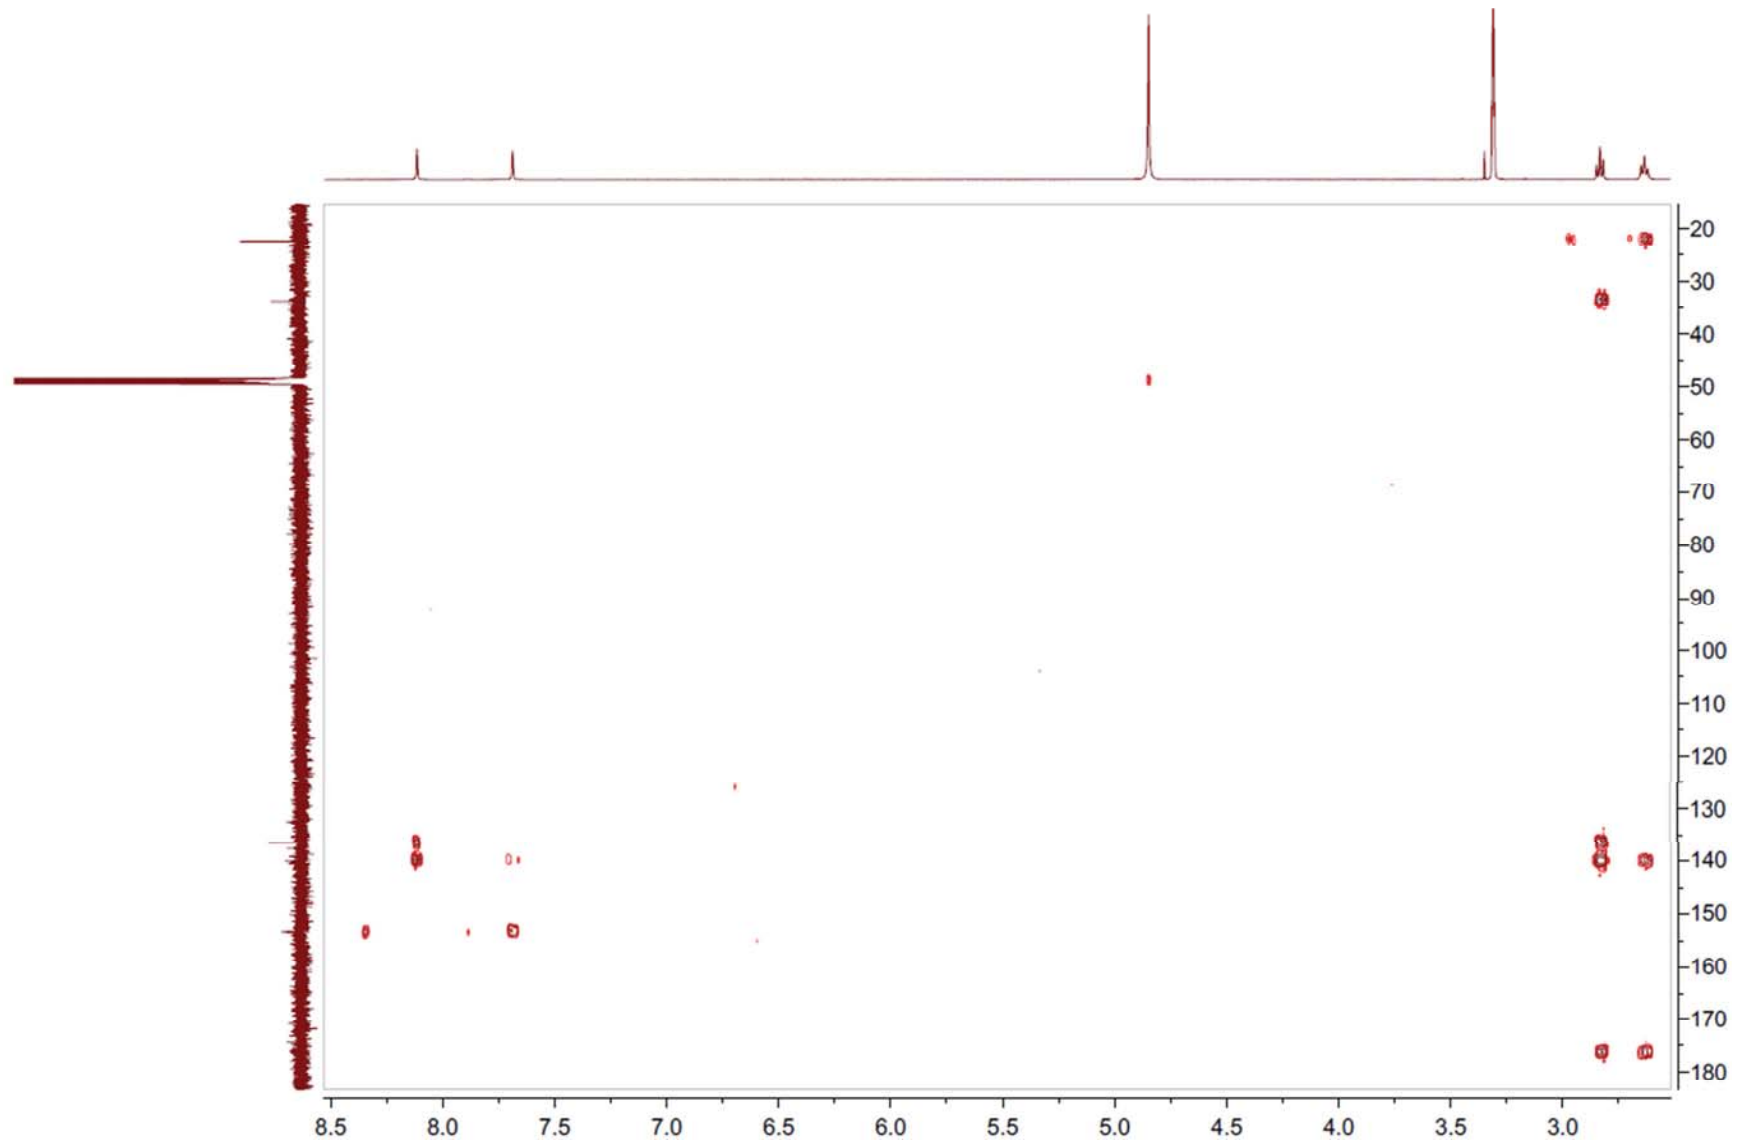

Figure S56. HMBC spectrum of compound 8 in CD<sub>3</sub>OD.

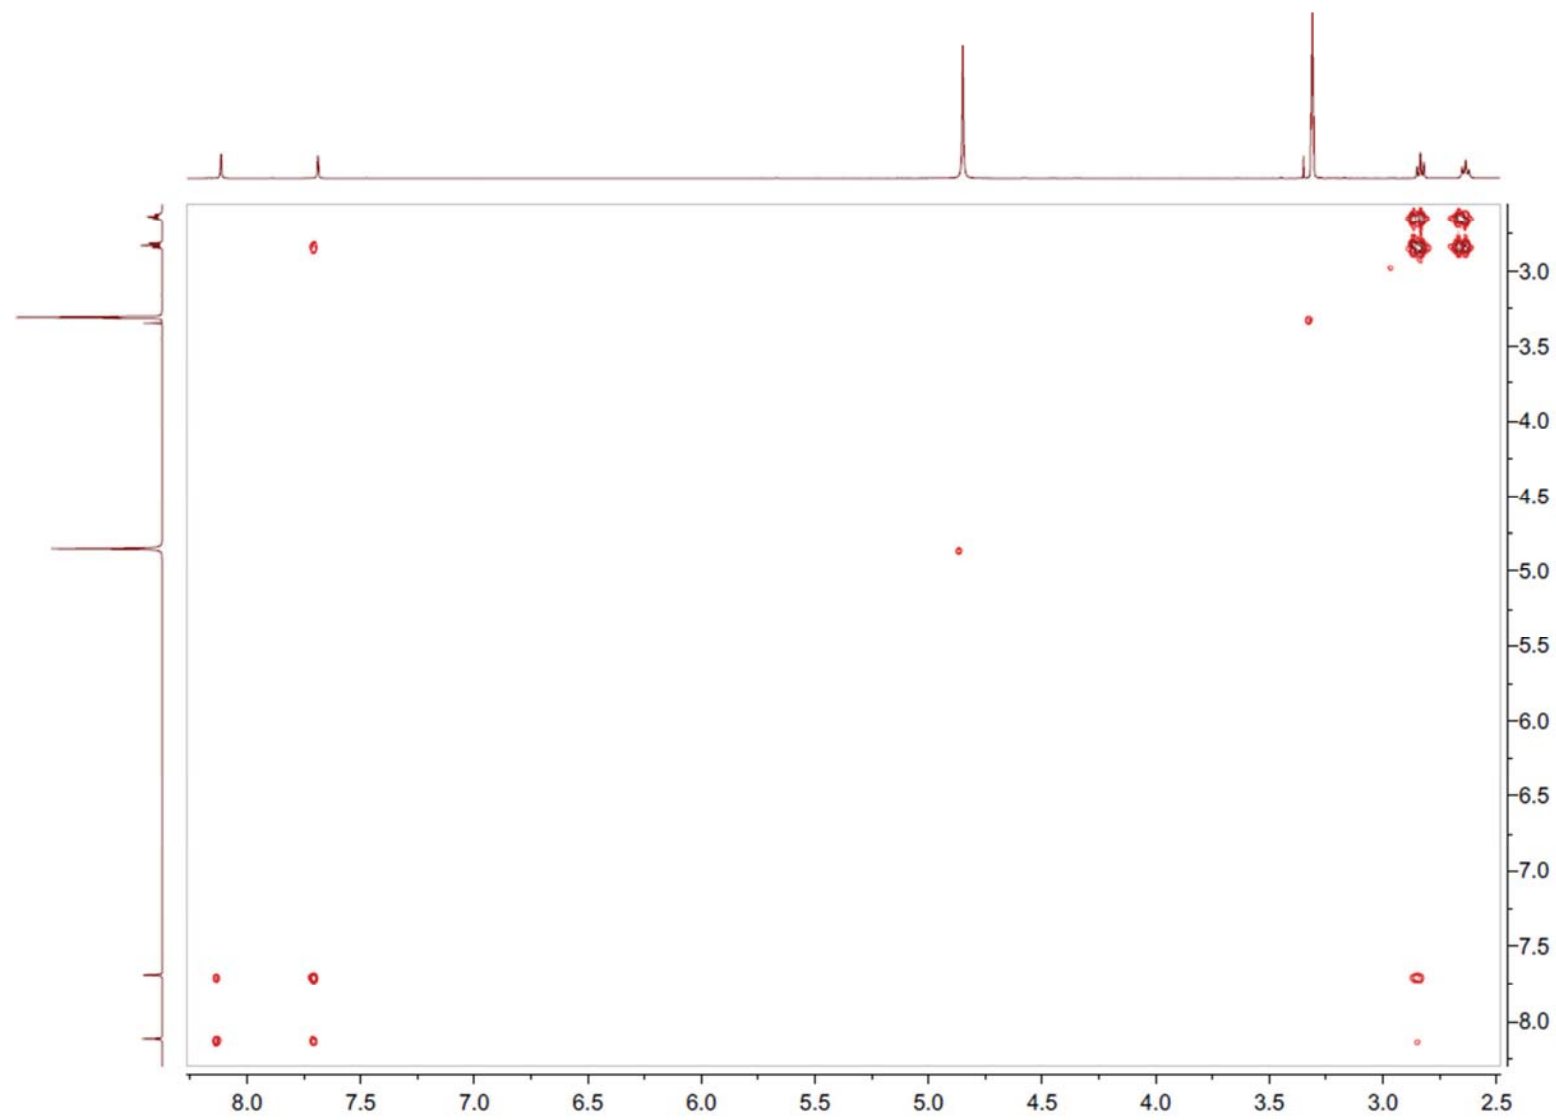

**Figure S57.** COSY spectrum of compound **8** in CD<sub>3</sub>OD.

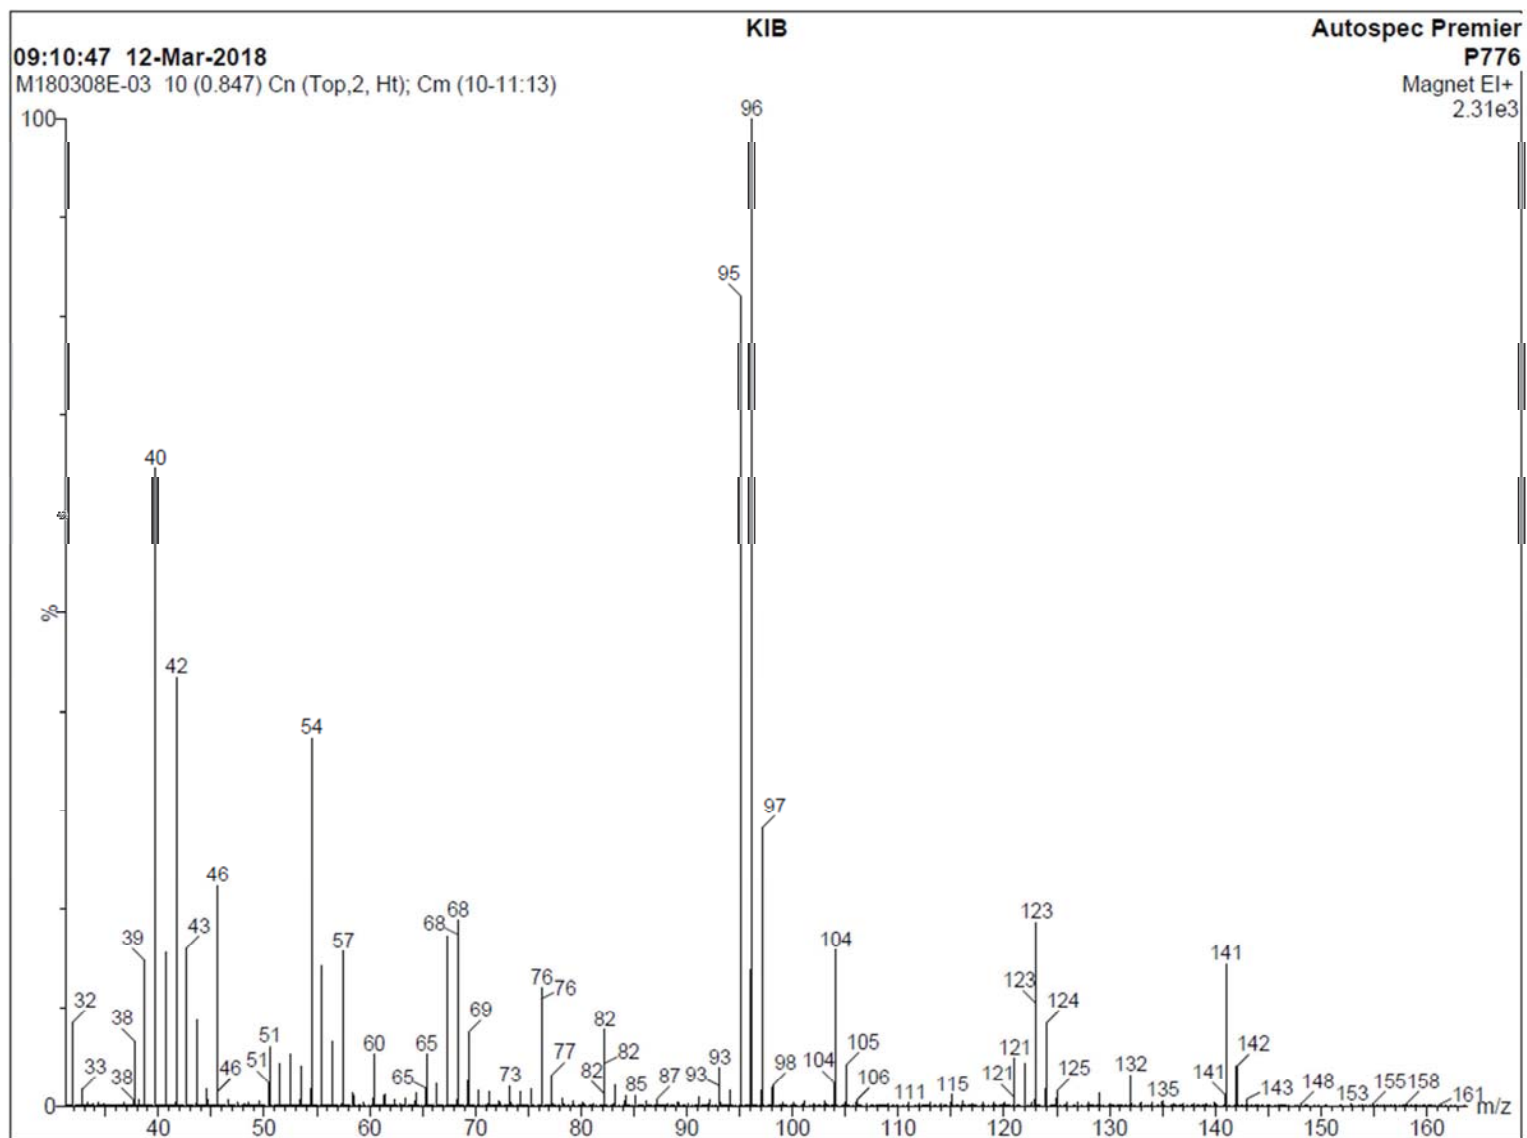

Figure S58. EIMS spectrum of compound 8.

### Single Mass Analysis

Tolerance = 10.0 PPM / DBE: min = -10.0, max = 120.0

Selected filters: None

Monoisotopic Mass, Odd and Even Electron Ions

10 formula(e) evaluated with 1 results within limits (up to 51 closest results for each mass)

Elements Used:

C: 0-200 H: 0-400 N: 1-1 O: 2-4

10:52:45 12-Mar-2018

Voltage EI+

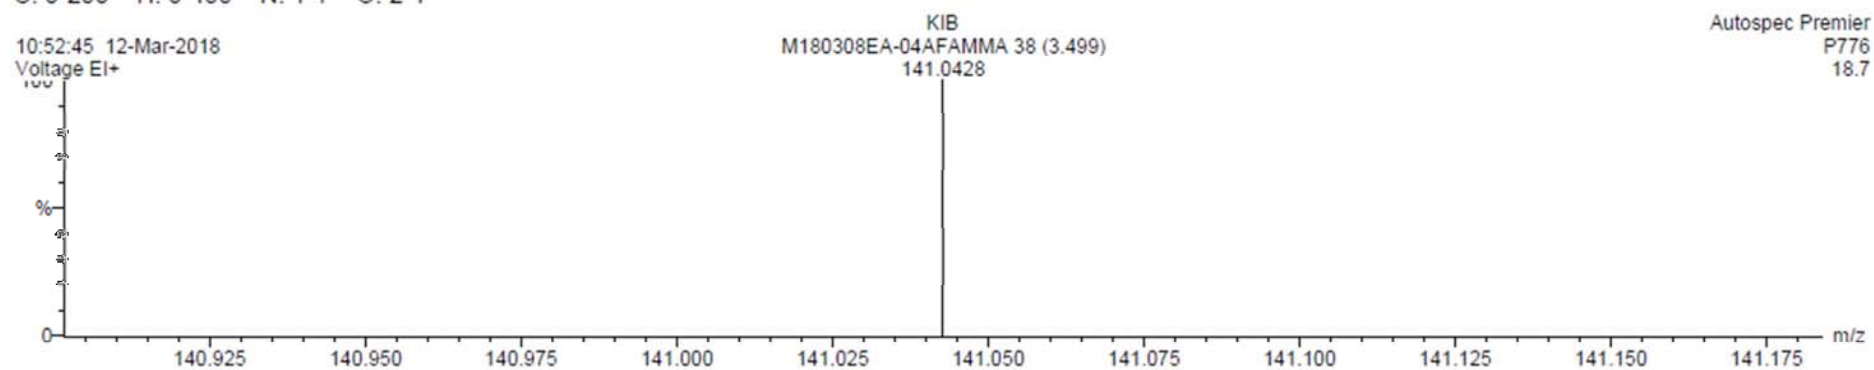

|          |            |      |     |       |           |            |
|----------|------------|------|-----|-------|-----------|------------|
| Minimum: |            |      |     | -10.0 |           |            |
| Maximum: | 200.0      | 10.0 |     | 120.0 |           |            |
| Mass     | Calc. Mass | mDa  | PPM | DBE   | i-FIT     | Formula    |
| 141.0428 | 141.0426   | 0.2  | 1.4 | 4.0   | 5546025.5 | C6 H7 N O3 |

Figure S59. HREIMS spectrum of compound 8.

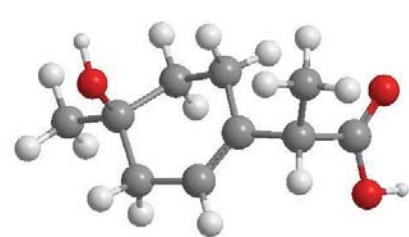

**a** (67.4%)

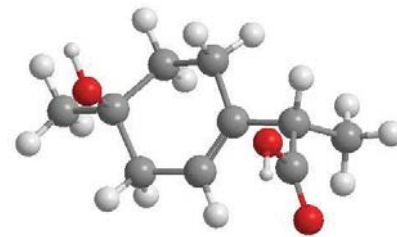

**b** (19.3%)

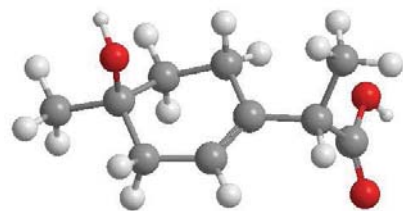

**c** (9.8%)

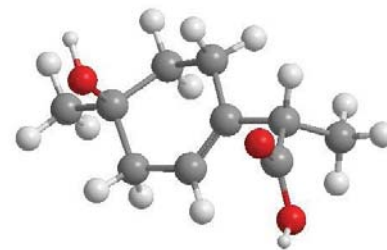

**d** (3.5%)

**Figure S60.** Energy-minimized conformers with populations of (3*S*,7*S*)-1-hydroxy-3-*p*-menthen-9-oic acid.  
(Regardless of rotations of methyl and hydroxy groups)

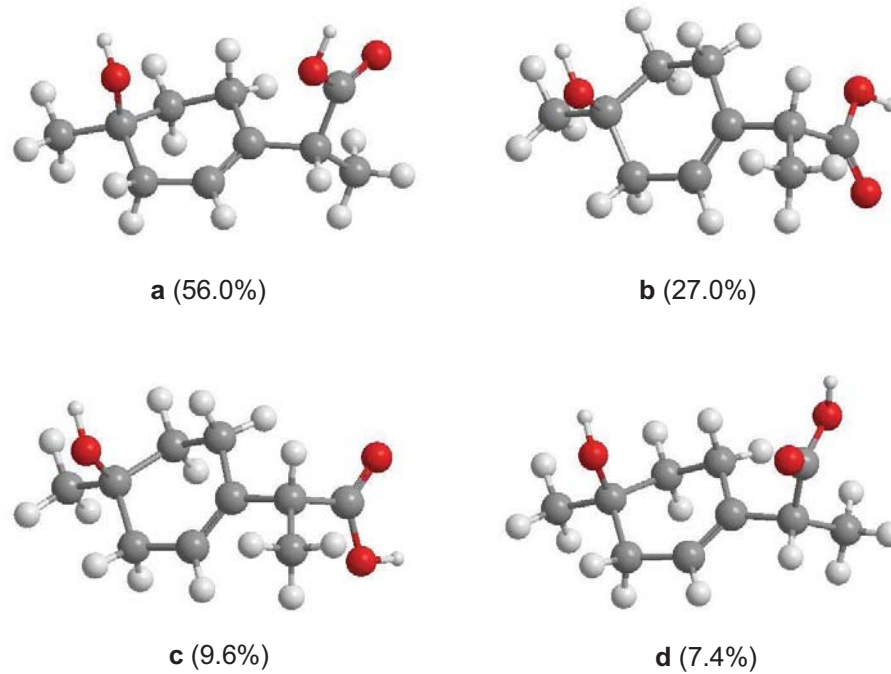

**Figure S61.** Energy-minimized conformers with populations of (3*S*,7*R*)-1-hydroxy-3-*p*-menthen-9-oic acid.  
(Regardless of rotations of methyl and hydroxy groups)



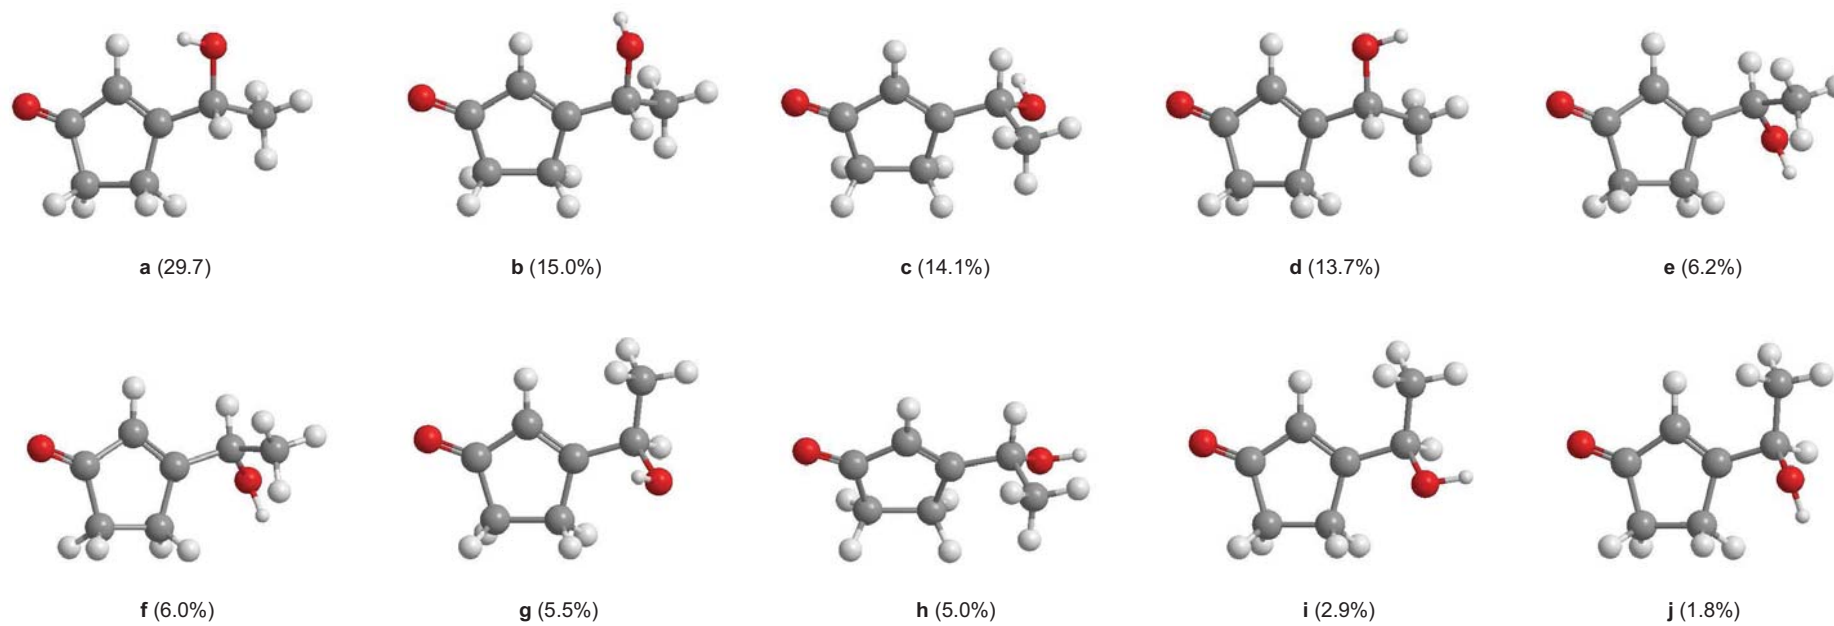

**Figure S62.** Energy-minimized conformers with populations of compound 5.

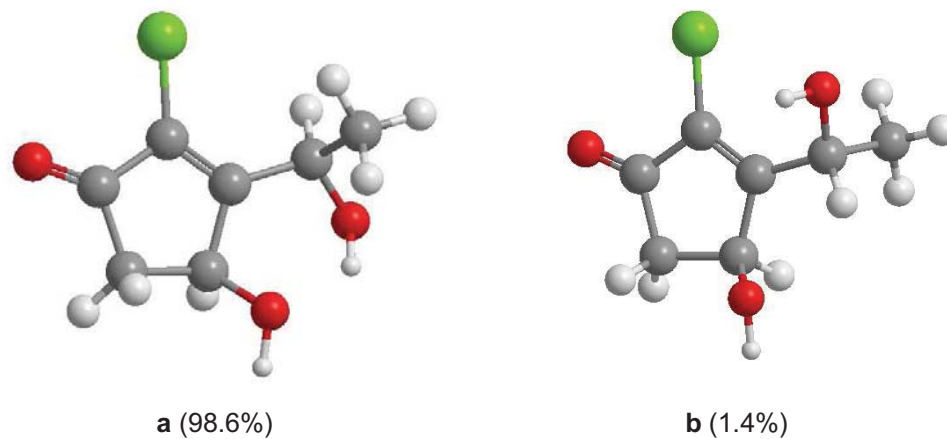

**Figure S63.** Energy-minimized conformers with populations of (3*S*,6*R*)-3-hydroxytrichodenone C.  
(Regardless of rotations of methyl and hydroxy groups)

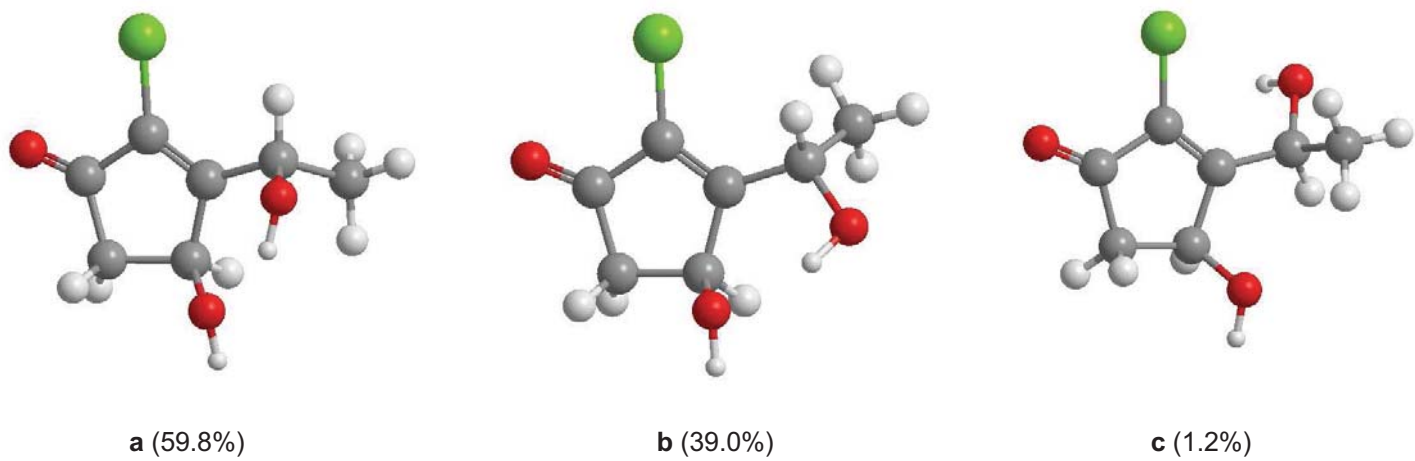

**Figure S64.** Energy-minimized conformers with populations of (3*S*,6*S*)-3-hydroxytrichodenone C.  
(Regardless of rotations of methyl and hydroxy groups)
